# Supplementary material
Source: PubMed Central journal article supplement (PMC4223491)
Supplement: supp_M114.040196_mcp.M114.040196-4.pdf [file supp_M114.040196_mcp.M114.040196-4.pdf]

**Peptide View**

MS/MS Fragmentation of **DPLVIELGQK**

Found in **gil3544973581reflXP\_003510787.11**, PREDICTED: peptidyl-prolyl cis-trans isomerase FKBP11-like [Cricetulus griseus]

Match to Query 1907: 1112.685448 from(557.350000,2+) intensity(2865.8213) rtinseconds(2080.6358) index(5746)

Title: 17496\_20120917\_cho\_glp1r\_inj2.6900.6900.0.dta

Data file 17496\_20120917\_cho\_glp1r\_inj2.prh1.mgf

Click mouse within plot area to zoom in by factor of two about that point

Or,  to  Da

Label all possible matches  Label matches used for scoring

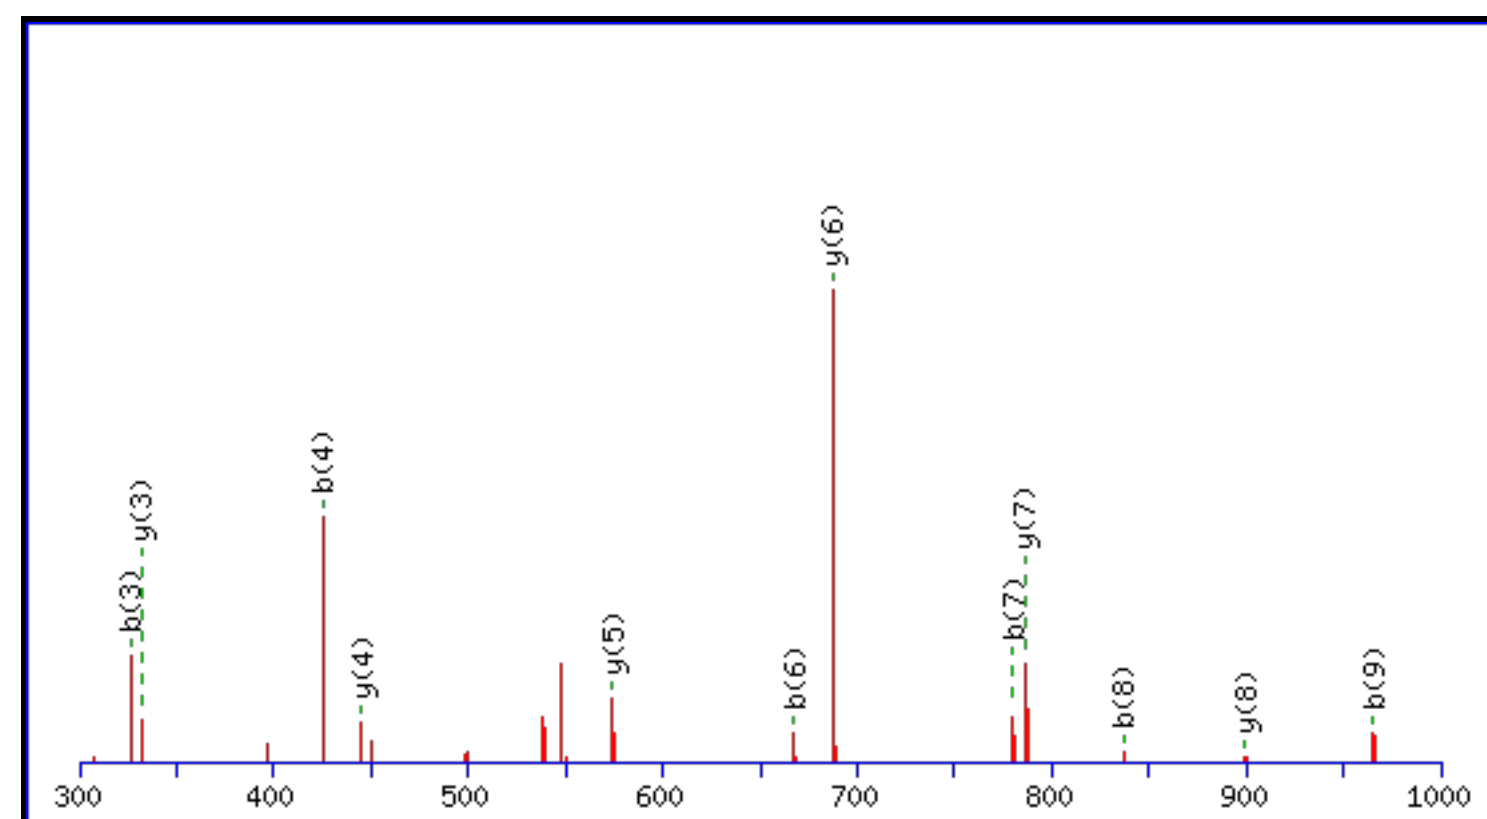

**Monoisotopic mass of neutral peptide Mr(calc):** 1110.6285

**Fixed modifications:** Carboxymethyl (C) (apply to specified residues or termini only)

**Ions Score:** 54 **Expect:** 0.0041

**Matches :** 12/84 fragment ions using 20 most intense peaks ([help](#))

| #  | b               | b <sup>++</sup> | b <sup>*</sup> | b <sup>*++</sup> | b <sup>0</sup> | b <sup>0++</sup> | Seq.     | y               | y <sup>++</sup> | y <sup>*</sup> | y <sup>*++</sup> | y <sup>0</sup> | y <sup>0++</sup> | #         |
|----|-----------------|-----------------|----------------|------------------|----------------|------------------|----------|-----------------|-----------------|----------------|------------------|----------------|------------------|-----------|
| 1  | 116.0342        | 58.5207         |                |                  | 98.0237        | 49.5155          | <b>D</b> |                 |                 |                |                  |                |                  | <b>10</b> |
| 2  | 213.0870        | 107.0471        |                |                  | 195.0764       | 98.0418          | <b>P</b> | 996.6088        | 498.8080        | 979.5823       | 490.2948         | 978.5982       | 489.8028         | <b>9</b>  |
| 3  | <b>326.1710</b> | 163.5892        |                |                  | 308.1605       | 154.5839         | <b>L</b> | <b>899.5560</b> | 450.2817        | 882.5295       | 441.7684         | 881.5455       | 441.2764         | <b>8</b>  |
| 4  | <b>425.2395</b> | 213.1234        |                |                  | 407.2289       | 204.1181         | <b>V</b> | <b>786.4720</b> | 393.7396        | 769.4454       | 385.2264         | 768.4614       | 384.7343         | <b>7</b>  |
| 5  | 538.3235        | 269.6654        |                |                  | 520.3130       | 260.6601         | <b>I</b> | <b>687.4036</b> | 344.2054        | 670.3770       | 335.6921         | 669.3930       | 335.2001         | <b>6</b>  |
| 6  | <b>667.3661</b> | 334.1867        |                |                  | 649.3556       | 325.1814         | <b>E</b> | <b>574.3195</b> | 287.6634        | 557.2930       | 279.1501         | 556.3089       | 278.6581         | <b>5</b>  |
| 7  | <b>780.4502</b> | 390.7287        |                |                  | 762.4396       | 381.7234         | <b>L</b> | <b>445.2769</b> | 223.1421        | 428.2504       | 214.6288         |                |                  | <b>4</b>  |
| 8  | <b>837.4716</b> | 419.2395        |                |                  | 819.4611       | 410.2342         | <b>G</b> | <b>332.1928</b> | 166.6001        | 315.1663       | 158.0868         |                |                  | <b>3</b>  |
| 9  | <b>965.5302</b> | 483.2688        | 948.5037       | 474.7555         | 947.5197       | 474.2635         | <b>Q</b> | 275.1714        | 138.0893        | 258.1448       | 129.5761         |                |                  | <b>2</b>  |
| 10 |                 |                 |                |                  |                |                  | <b>K</b> | 147.1128        | 74.0600         | 130.0863       | 65.5468          |                |                  | <b>1</b>  |

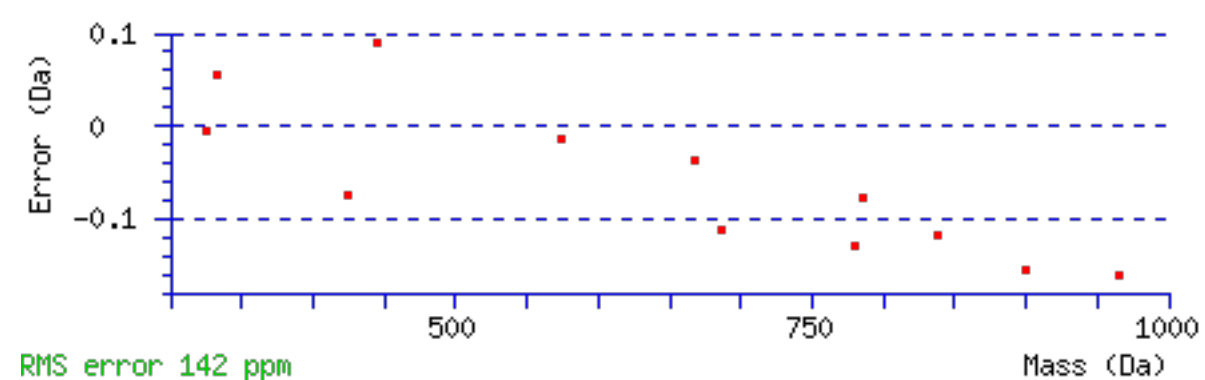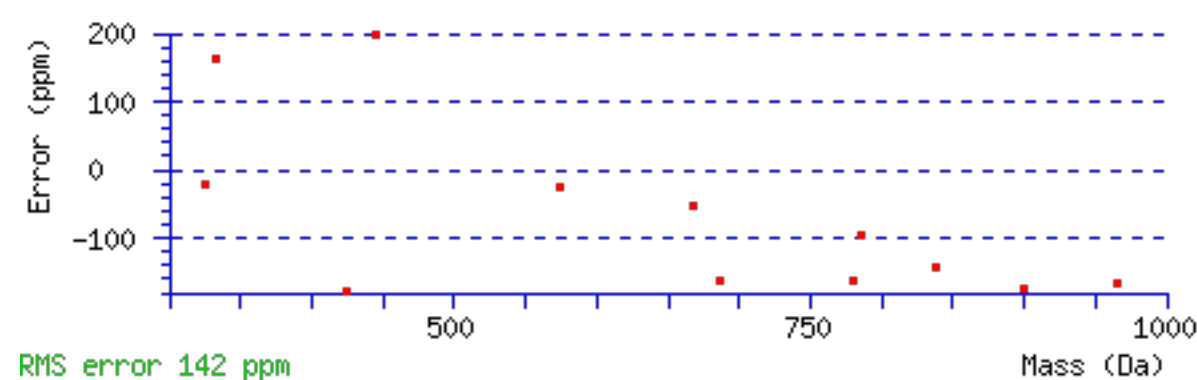

NCBI **BLAST** search of [DPLVIELGQK](#)

(Parameters: blastp, nr protein database, expect=20000, no filter, PAM30)

Other BLAST [web gateways](#)

**All matches to this query**

| Score | Mr(calc): | Delta  | Sequence                    |
|-------|-----------|--------|-----------------------------|
| 54.4  | 1110.6285 | 2.0570 | <a href="#">DPLVIELGQK</a>  |
| 22.1  | 1110.6761 | 2.0094 | <a href="#">EVPVLRITGLK</a> |
| 22.1  | 1110.6649 | 2.0206 | <a href="#">IVIVVPQDTK</a>  |
| 18.4  | 1111.3736 | 1.3118 | <a href="#">MMMMMMMK</a>    |
| 18.1  | 1111.6601 | 1.0254 | <a href="#">ALQLLLGAGEK</a> |
| 13.2  | 1111.5986 | 1.0869 | <a href="#">TSSGLIEHIR</a>  |
| 12.4  | 1111.5372 | 1.1483 | <a href="#">IPAYENFMK</a>   |

|      |           |        |                            |
|------|-----------|--------|----------------------------|
| 12.1 | 1111.5696 | 1.1159 | <a href="#">ARVTMIDYK</a>  |
| 11.5 | 1111.6713 | 1.0141 | <a href="#">VLIRVAEANK</a> |
| 10.0 | 1111.6489 | 1.0366 | <a href="#">DIPVDTVLLK</a> |

**Mascot:** <http://www.matrixscience.com/>

# MASCOT Search Results

## Peptide View

MS/MS Fragmentation of **EALKDEYDDLSDLTAAQQETLSDWESQFTFK**

Found in **gil354475732reflXP\_003500081.11**, PREDICTED: membrane-associated progesterone receptor component 1-like [Cricetulus griseus]

Match to Query 15213: 3622.388172 from(1208.470000,3+) intensity(4439.7368) rtinseconds(3784.4942) index(10141)

Title: 17492\_20120825\_cho\_glp1r\_2hrp.12329.12329.0.dta

Data file 17492\_20120825\_cho\_glp1r\_2hrp.prh1.mgf

Click mouse within plot area to zoom in by factor of two about that point

Or,  to  Da

Label all possible matches  Label matches used for scoring

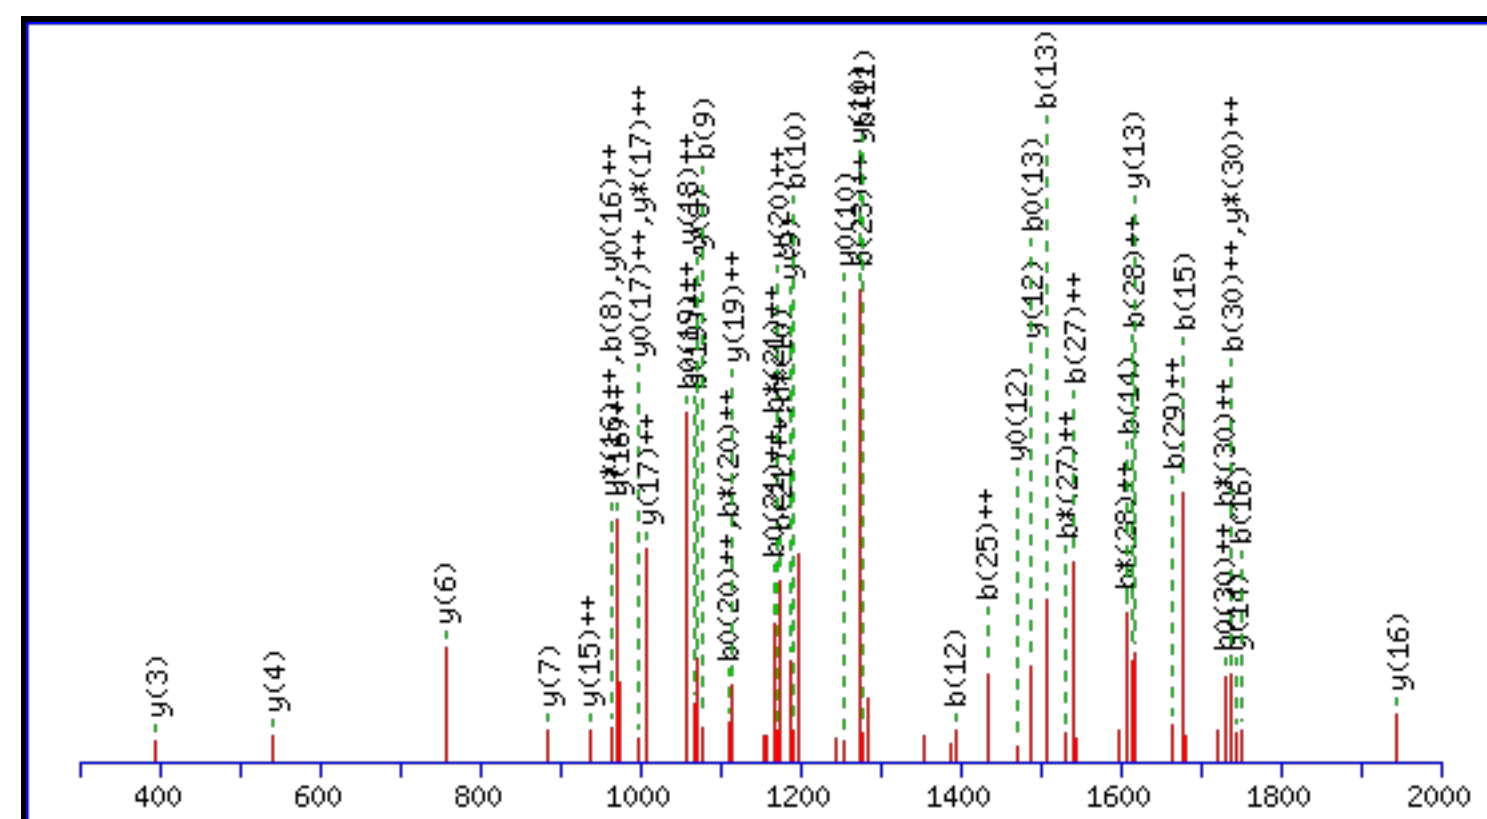

Monoisotopic mass of neutral peptide  $M_r(\text{calc})$ : 3622.6475

Fixed modifications: Carboxymethyl (C) (apply to specified residues or termini only)

Ions Score: 93 Expect: 2.3e-07

Matches : 52/350 fragment ions using 58 most intense peaks ([help](#))

| #  | b         | b <sup>++</sup> | b <sup>*</sup> | b <sup>*++</sup> | b <sup>0</sup> | b <sup>0++</sup> | Seq. | y         | y <sup>++</sup> | y <sup>*</sup> | y <sup>*++</sup> | y <sup>0</sup> | y <sup>0++</sup> | #  |
|----|-----------|-----------------|----------------|------------------|----------------|------------------|------|-----------|-----------------|----------------|------------------|----------------|------------------|----|
| 1  | 130.0499  | 65.5286         |                |                  | 112.0393       | 56.5233          | E    |           |                 |                |                  |                |                  | 31 |
| 2  | 201.0870  | 101.0471        |                |                  | 183.0764       | 92.0418          | A    | 3494.6122 | 1747.8097       | 3477.5856      | 1739.2965        | 3476.6016      | 1738.8044        | 30 |
| 3  | 314.1710  | 157.5892        |                |                  | 296.1605       | 148.5839         | L    | 3423.5751 | 1712.2912       | 3406.5485      | 1703.7779        | 3405.5645      | 1703.2859        | 29 |
| 4  | 442.2660  | 221.6366        | 425.2395       | 213.1234         | 424.2554       | 212.6314         | K    | 3310.4910 | 1655.7491       | 3293.4645      | 1647.2359        | 3292.4804      | 1646.7439        | 28 |
| 5  | 557.2930  | 279.1501        | 540.2664       | 270.6368         | 539.2824       | 270.1448         | D    | 3182.3960 | 1591.7017       | 3165.3695      | 1583.1884        | 3164.3855      | 1582.6964        | 27 |
| 6  | 686.3355  | 343.6714        | 669.3090       | 335.1581         | 668.3250       | 334.6661         | E    | 3067.3691 | 1534.1882       | 3050.3426      | 1525.6749        | 3049.3585      | 1525.1829        | 26 |
| 7  | 849.3989  | 425.2031        | 832.3723       | 416.6898         | 831.3883       | 416.1978         | Y    | 2938.3265 | 1469.6669       | 2921.3000      | 1461.1536        | 2920.3159      | 1460.6616        | 25 |
| 8  | 964.4258  | 482.7165        | 947.3993       | 474.2033         | 946.4153       | 473.7113         | D    | 2775.2632 | 1388.1352       | 2758.2366      | 1379.6220        | 2757.2526      | 1379.1299        | 24 |
| 9  | 1079.4528 | 540.2300        | 1062.4262      | 531.7167         | 1061.4422      | 531.2247         | D    | 2660.2362 | 1330.6218       | 2643.2097      | 1322.1085        | 2642.2257      | 1321.6165        | 23 |
| 10 | 1192.5368 | 596.7721        | 1175.5103      | 588.2588         | 1174.5263      | 587.7668         | L    | 2545.2093 | 1273.1083       | 2528.1827      | 1264.5950        | 2527.1987      | 1264.1030        | 22 |
| 11 | 1279.5689 | 640.2881        | 1262.5423      | 631.7748         | 1261.5583      | 631.2828         | S    | 2432.1252 | 1216.5663       | 2415.0987      | 1208.0530        | 2414.1147      | 1207.5610        | 21 |
| 12 | 1394.5958 | 697.8015        | 1377.5692      | 689.2883         | 1376.5852      | 688.7963         | D    | 2345.0932 | 1173.0502       | 2328.0667      | 1164.5370        | 2327.0826      | 1164.0450        | 20 |
| 13 | 1507.6799 | 754.3436        | 1490.6533      | 745.8303         | 1489.6693      | 745.3383         | L    | 2230.0663 | 1115.5368       | 2213.0397      | 1107.0235        | 2212.0557      | 1106.5315        | 19 |
| 14 | 1608.7275 | 804.8674        | 1591.7010      | 796.3541         | 1590.7170      | 795.8621         | T    | 2116.9822 | 1058.9947       | 2099.9556      | 1050.4815        | 2098.9716      | 1049.9895        | 18 |
| 15 | 1679.7647 | 840.3860        | 1662.7381      | 831.8727         | 1661.7541      | 831.3807         | A    | 2015.9345 | 1008.4709       | 1998.9080      | 999.9576         | 1997.9239      | 999.4656         | 17 |
| 16 | 1750.8018 | 875.9045        | 1733.7752      | 867.3912         | 1732.7912      | 866.8992         | A    | 1944.8974 | 972.9523        | 1927.8709      | 964.4391         | 1926.8868      | 963.9471         | 16 |
| 17 | 1878.8603 | 939.9338        | 1861.8338      | 931.4205         | 1860.8498      | 930.9285         | Q    | 1873.8603 | 937.4338        | 1856.8337      | 928.9205         | 1855.8497      | 928.4285         | 15 |
| 18 | 2006.9189 | 1003.9631       | 1989.8924      | 995.4498         | 1988.9084      | 994.9578         | Q    | 1745.8017 | 873.4045        | 1728.7752      | 864.8912         | 1727.7911      | 864.3992         | 14 |
| 19 | 2135.9615 | 1068.4844       | 2118.9350      | 1059.9711        | 2117.9510      | 1059.4791        | E    | 1617.7431 | 809.3752        | 1600.7166      | 800.8619         | 1599.7326      | 800.3699         | 13 |
| 20 | 2237.0092 | 1119.0082       | 2219.9826      | 1110.4950        | 2218.9986      | 1110.0030        | T    | 1488.7005 | 744.8539        | 1471.6740      | 736.3406         | 1470.6900      | 735.8486         | 12 |
| 21 | 2350.0933 | 1175.5503       | 2333.0667      | 1167.0370        | 2332.0827      | 1166.5450        | L    | 1387.6529 | 694.3301        | 1370.6263      | 685.8168         | 1369.6423      | 685.3248         | 11 |
| 22 | 2437.1253 | 1219.0663       | 2420.0987      | 1210.5530        | 2419.1147      | 1210.0610        | S    | 1274.5688 | 637.7880        | 1257.5422      | 629.2748         | 1256.5582      | 628.7828         | 10 |
| 23 | 2552.1522 | 1276.5798       | 2535.1257      | 1268.0665        | 2534.1417      | 1267.5745        | D    | 1187.5368 | 594.2720        | 1170.5102      | 585.7587         | 1169.5262      | 585.2667         | 9  |
| 24 | 2738.2315 | 1369.6194       | 2721.2050      | 1361.1061        | 2720.2210      | 1360.6141        | W    | 1072.5098 | 536.7585        | 1055.4833      | 528.2453         | 1054.4993      | 527.7533         | 8  |
| 25 | 2867.2741 | 1434.1407       | 2850.2476      | 1425.6274        | 2849.2636      | 1425.1354        | E    | 886.4305  | 443.7189        | 869.4040       | 435.2056         | 868.4199       | 434.7136         | 7  |
| 26 | 2954.3062 | 1477.6567       | 2937.2796      | 1469.1434        | 2936.2956      | 1468.6514        | S    | 757.3879  | 379.1976        | 740.3614       | 370.6843         | 739.3774       | 370.1923         | 6  |
| 27 | 3082.3647 | 1541.6860       | 3065.3382      | 1533.1727        | 3064.3542      | 1532.6807        | Q    | 670.3559  | 335.6816        | 653.3293       | 327.1683         | 652.3453       | 326.6763         | 5  |
| 28 | 3229.4332 | 1615.2202       | 3212.4066      | 1606.7069        | 3211.4226      | 1606.2149        | F    | 542.2973  | 271.6523        | 525.2708       | 263.1390         | 524.2867       | 262.6470         | 4  |
| 29 | 3330.4808 | 1665.7441       | 3313.4543      | 1657.2308        | 3312.4703      | 1656.7388        | T    | 395.2289  | 198.1181        | 378.2023       | 189.6048         | 377.2183       | 189.1128         | 3  |
| 30 | 3477.5492 | 1739.2783       | 3460.5227      | 1730.7650        | 3459.5387      | 1730.2730        | F    | 294.1812  | 147.5942        | 277.1547       | 139.0810         |                |                  | 2  |

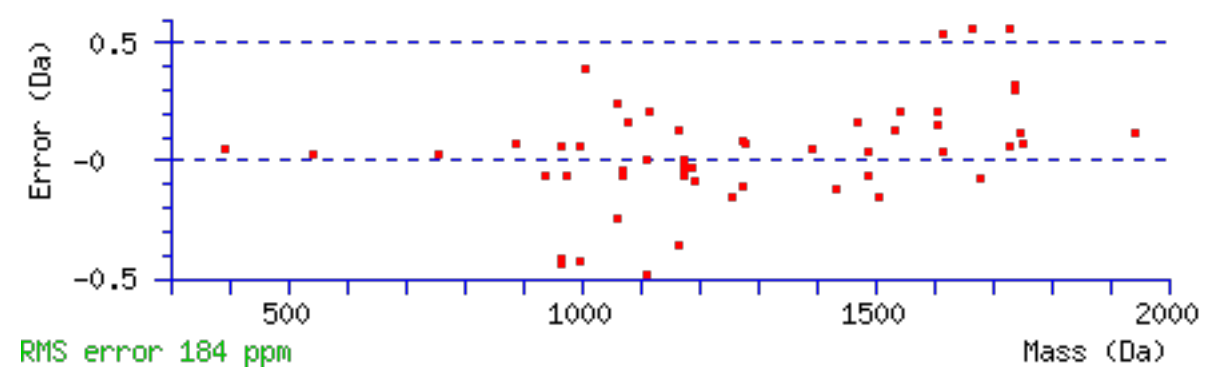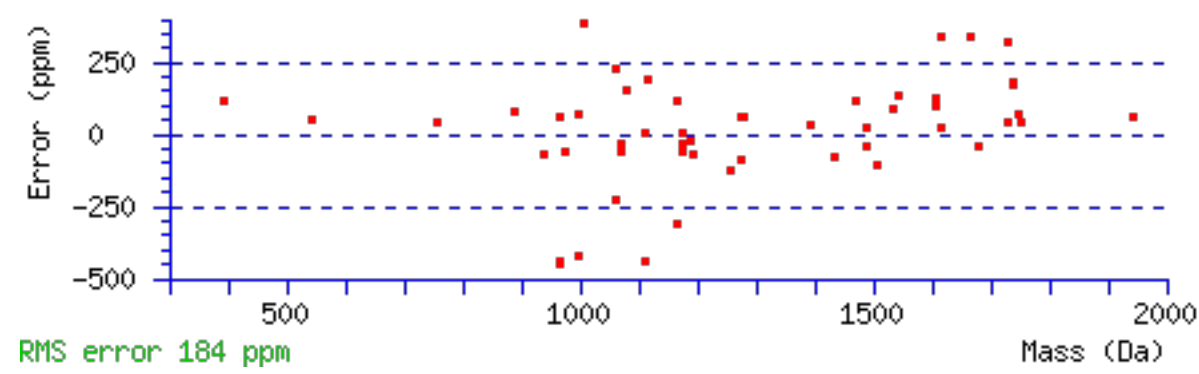

NCBI **BLAST** search of [EALKDEYDDLSDLTAAQOETLSDWESQFTFK](#)  
 (Parameters: blastp, nr protein database, expect=20000, no filter, PAM30)  
 Other BLAST [web gateways](#)

**All matches to this query**

| Score | Mr(calc): | Delta   | Sequence                                             |
|-------|-----------|---------|------------------------------------------------------|
| 93.3  | 3622.6475 | -0.2593 | <a href="#">EALKDEYDDLSDLTAAQOETLSDWESQFTFK</a>      |
| 7.6   | 3620.7709 | 1.6173  | <a href="#">LSEDTTPGEVMEQWIVQGDQPSTPGFIIYLLR</a>     |
| 7.3   | 3622.8449 | -0.4567 | <a href="#">GEAMVAVITDVAAAYLKAGPSTLGPCMINAGSLVFK</a> |
| 7.0   | 3622.8882 | -0.5001 | <a href="#">EIDALTLRGSANYLDALQYLIDIELPTVQGYR</a>     |
| 4.7   | 3619.7603 | 2.6278  | <a href="#">ILEEEVTTLFELFDGHDTSGLKLMQEVPER</a>       |
| 4.7   | 3619.6030 | 2.7852  | <a href="#">GLDTLEAVSSPTVETAMMEEDDGDVTPVASHDGTK</a>  |
| 4.7   | 3619.6030 | 2.7852  | <a href="#">GLDTLEAVSSPTVETAMMEEDDGDVTPVASHDGTK</a>  |
| 4.2   | 3623.6247 | -1.2365 | <a href="#">DMVAGGGWFMTMNYGVHAVMYSYALRAAGFR</a>      |
| 3.3   | 3623.6247 | -1.2365 | <a href="#">DMVAGGGWFMTMNYGVHAVMYSYALRAAGFR</a>      |
| 2.5   | 3623.8648 | -1.4766 | <a href="#">FLFVIHEMVIIFTMKAALVHWFQMNHVYK</a>        |

Mascot: <http://www.matrixscience.com/>



# MASCOT Search Results

## Peptide View

MS/MS Fragmentation of **IGIIGGTGLDDPEILEGR**

Found in **gil354493494reflXP\_003508876.1**, PREDICTED: S-methyl-5'-thioadenosine phosphorylase-like [*Cricetulus griseus*]

Match to Query 8207: 1824.625448 from(913.320000,2+) intensity(6016.0845) rtinseconds(2614.9864) index(7088)

Title: 17492\_20120825\_cho\_glp1r\_2hrp.8665.8665.0.dta

Data file 17492\_20120825\_cho\_glp1r\_2hrp.prh1.mgf

Click mouse within plot area to zoom in by factor of two about that point

Or,  to  Da

Label all possible matches  Label matches used for scoring

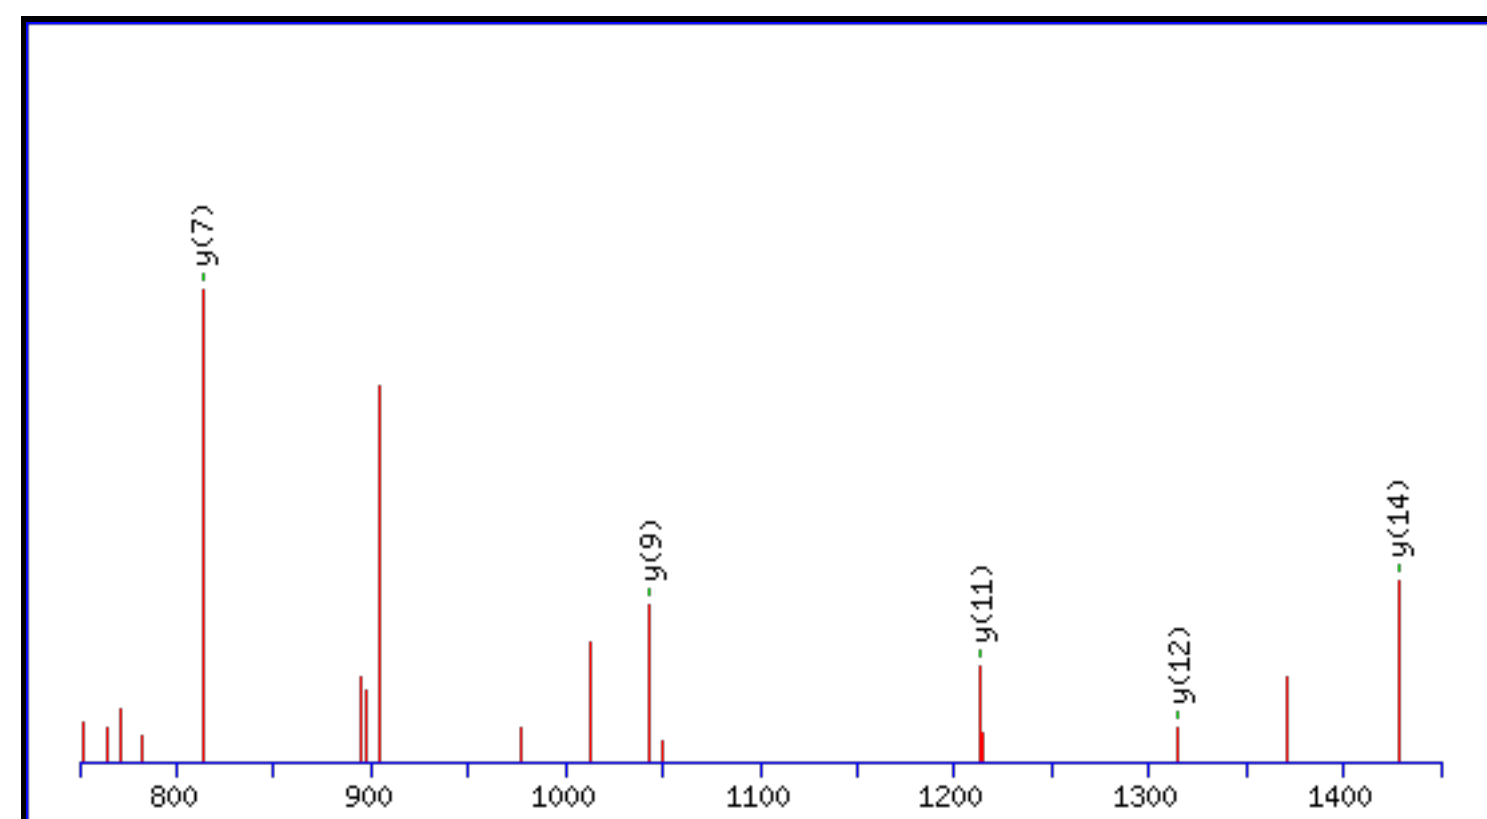

**Monoisotopic mass of neutral peptide Mr(calc):** 1823.9629

**Fixed modifications:** Carboxymethyl (C) (apply to specified residues or termini only)

**Ions Score:** 45 **Expect:** 0.024

**Matches :** 5/154 fragment ions using 6 most intense peaks ([help](#))

| #  | b         | b <sup>++</sup> | b <sup>0</sup> | b <sup>0++</sup> | Seq. | y                | y <sup>++</sup> | y <sup>*</sup> | y <sup>***</sup> | y <sup>0</sup> | y <sup>0++</sup> | #  |
|----|-----------|-----------------|----------------|------------------|------|------------------|-----------------|----------------|------------------|----------------|------------------|----|
| 1  | 114.0913  | 57.5493         |                |                  | I    |                  |                 |                |                  |                |                  | 18 |
| 2  | 171.1128  | 86.0600         |                |                  | G    | 1711.8861        | 856.4467        | 1694.8596      | 847.9334         | 1693.8755      | 847.4414         | 17 |
| 3  | 284.1969  | 142.6021        |                |                  | I    | 1654.8646        | 827.9360        | 1637.8381      | 819.4227         | 1636.8541      | 818.9307         | 16 |
| 4  | 397.2809  | 199.1441        |                |                  | I    | 1541.7806        | 771.3939        | 1524.7540      | 762.8807         | 1523.7700      | 762.3886         | 15 |
| 5  | 454.3024  | 227.6548        |                |                  | G    | <b>1428.6965</b> | 714.8519        | 1411.6700      | 706.3386         | 1410.6859      | 705.8466         | 14 |
| 6  | 511.3239  | 256.1656        |                |                  | G    | 1371.6751        | 686.3412        | 1354.6485      | 677.8279         | 1353.6645      | 677.3359         | 13 |
| 7  | 612.3715  | 306.6894        | 594.3610       | 297.6841         | T    | <b>1314.6536</b> | 657.8304        | 1297.6270      | 649.3172         | 1296.6430      | 648.8251         | 12 |
| 8  | 669.3930  | 335.2001        | 651.3824       | 326.1949         | G    | <b>1213.6059</b> | 607.3066        | 1196.5794      | 598.7933         | 1195.5953      | 598.3013         | 11 |
| 9  | 782.4771  | 391.7422        | 764.4665       | 382.7369         | L    | 1156.5844        | 578.7959        | 1139.5579      | 570.2826         | 1138.5739      | 569.7906         | 10 |
| 10 | 897.5040  | 449.2556        | 879.4934       | 440.2504         | D    | <b>1043.5004</b> | 522.2538        | 1026.4738      | 513.7406         | 1025.4898      | 513.2485         | 9  |
| 11 | 1012.5310 | 506.7691        | 994.5204       | 497.7638         | D    | 928.4734         | 464.7404        | 911.4469       | 456.2271         | 910.4629       | 455.7351         | 8  |
| 12 | 1109.5837 | 555.2955        | 1091.5732      | 546.2902         | P    | <b>813.4465</b>  | 407.2269        | 796.4199       | 398.7136         | 795.4359       | 398.2216         | 7  |
| 13 | 1238.6263 | 619.8168        | 1220.6157      | 610.8115         | E    | 716.3937         | 358.7005        | 699.3672       | 350.1872         | 698.3832       | 349.6952         | 6  |
| 14 | 1351.7104 | 676.3588        | 1333.6998      | 667.3535         | I    | 587.3511         | 294.1792        | 570.3246       | 285.6659         | 569.3406       | 285.1739         | 5  |
| 15 | 1464.7944 | 732.9009        | 1446.7839      | 723.8956         | L    | 474.2671         | 237.6372        | 457.2405       | 229.1239         | 456.2565       | 228.6319         | 4  |
| 16 | 1593.8370 | 797.4222        | 1575.8265      | 788.4169         | E    | 361.1830         | 181.0951        | 344.1565       | 172.5819         | 343.1724       | 172.0899         | 3  |
| 17 | 1650.8585 | 825.9329        | 1632.8479      | 816.9276         | G    | 232.1404         | 116.5738        | 215.1139       | 108.0606         |                |                  | 2  |
| 18 |           |                 |                |                  | R    | 175.1190         | 88.0631         | 158.0924       | 79.5498          |                |                  | 1  |

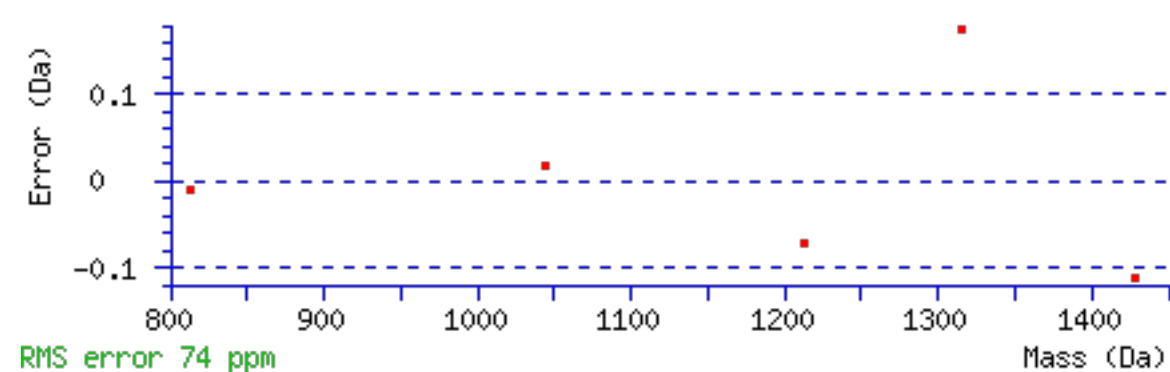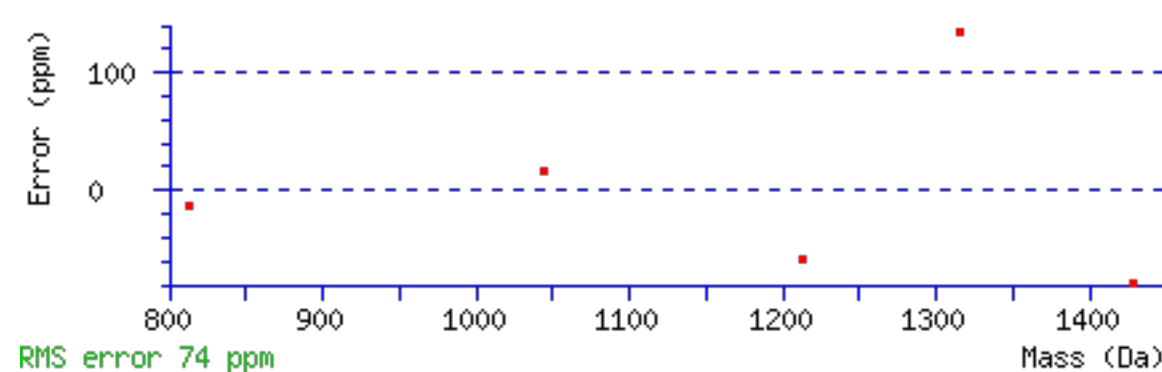

NCBI BLAST search of [IGIIGGTGLDDPEILEGR](#)

(Parameters: blastp, nr protein database, expect=20000, no filter, PAM30)

Other BLAST [web gateways](#)

All matches to this query

| Score | Mr(calc)  | Delta   | Sequence                            |
|-------|-----------|---------|-------------------------------------|
| 44.7  | 1823.9629 | 0.6626  | <a href="#">IGIIGGTGLDDPEILEGR</a>  |
| 7.0   | 1824.8927 | -0.2673 | <a href="#">IALEGEIGKEICSSYR</a>    |
| 5.2   | 1824.8901 | -0.2646 | <a href="#">LRAGGGGPSAMAIEVGPDR</a> |
| 4.7   | 1823.7771 | 0.8483  | <a href="#">PDNEVEEMVEEYVDK</a>     |
| 4.5   | 1821.8050 | 2.8204  | <a href="#">SENVVTNGEMEAATAASPK</a> |
| 4.1   | 1822.8771 | 1.7484  | <a href="#">VLREEEGPVSMASFK</a>     |
| 4.0   | 1826.9131 | -2.2877 | <a href="#">ALGQMNLGKEVHDMIR</a>    |
| 3.4   | 1826.9097 | -2.2843 | <a href="#">SDQALGPLPPPAMHQPR</a>   |
| 3.2   | 1826.8581 | -2.2326 | <a href="#">HSPQTESMISSIGNPAR</a>   |
| 3.1   | 1824.8862 | -0.2608 | <a href="#">SMYNRVSDPLIVVCR</a>     |

Mascot: <http://www.matrixscience.com/>

# MASCOT Search Results

## Peptide View

MS/MS Fragmentation of **ALLANALTSALR**

Found in **gil354503516reflXP\_003513827.11**, PREDICTED: transmembrane protein 33-like [Cricetulus griseus]

Match to Query 2953: 1212.225448 from(607.120000,2+) intensity(1455.7898) rtinseconds(2586.5322) index(7105)

Title: 17496\_20120917\_cho\_glp1r\_inj2.8530.8530.0.dta

Data file 17496\_20120917\_cho\_glp1r\_inj2.prh1.mgf

Click mouse within plot area to zoom in by factor of two about that point

Or,   to  Da

Label all possible matches  Label matches used for scoring

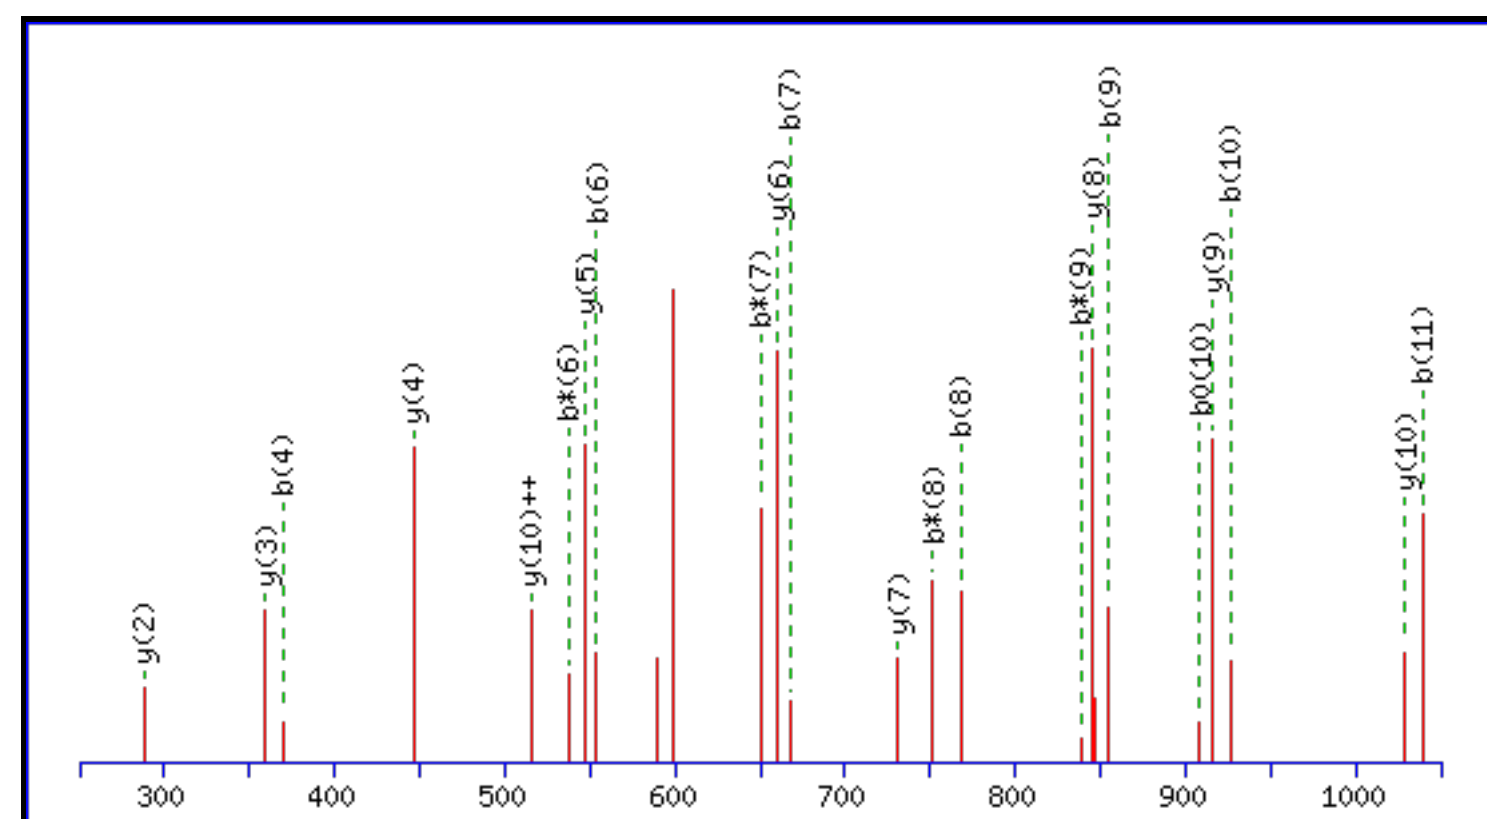

Monoisotopic mass of neutral peptide  $M_r(\text{calc})$ : 1212.7190

Fixed modifications: Carboxymethyl (C) (apply to specified residues or termini only)

Ions Score: 95 Expect: 3.6e-07

Matches : 22/104 fragment ions using 25 most intense peaks ([help](#))

| #  | b         | b <sup>++</sup> | b*        | b <sup>*++</sup> | b <sup>0</sup> | b <sup>0++</sup> | Seq. | y         | y <sup>++</sup> | y*        | y <sup>*++</sup> | y <sup>0</sup> | y <sup>0++</sup> | #  |
|----|-----------|-----------------|-----------|------------------|----------------|------------------|------|-----------|-----------------|-----------|------------------|----------------|------------------|----|
| 1  | 72.0444   | 36.5258         |           |                  |                |                  | A    |           |                 |           |                  |                |                  | 12 |
| 2  | 185.1285  | 93.0679         |           |                  |                |                  | L    | 1142.6892 | 571.8482        | 1125.6626 | 563.3350         | 1124.6786      | 562.8429         | 11 |
| 3  | 298.2125  | 149.6099        |           |                  |                |                  | L    | 1029.6051 | 515.3062        | 1012.5786 | 506.7929         | 1011.5946      | 506.3009         | 10 |
| 4  | 369.2496  | 185.1285        |           |                  |                |                  | A    | 916.5211  | 458.7642        | 899.4945  | 450.2509         | 898.5105       | 449.7589         | 9  |
| 5  | 483.2926  | 242.1499        | 466.2660  | 233.6366         |                |                  | N    | 845.4839  | 423.2456        | 828.4574  | 414.7323         | 827.4734       | 414.2403         | 8  |
| 6  | 554.3297  | 277.6685        | 537.3031  | 269.1552         |                |                  | A    | 731.4410  | 366.2241        | 714.4145  | 357.7109         | 713.4305       | 357.2189         | 7  |
| 7  | 667.4137  | 334.2105        | 650.3872  | 325.6972         |                |                  | L    | 660.4039  | 330.7056        | 643.3774  | 322.1923         | 642.3933       | 321.7003         | 6  |
| 8  | 768.4614  | 384.7343        | 751.4349  | 376.2211         | 750.4509       | 375.7291         | T    | 547.3198  | 274.1636        | 530.2933  | 265.6503         | 529.3093       | 265.1583         | 5  |
| 9  | 855.4934  | 428.2504        | 838.4669  | 419.7371         | 837.4829       | 419.2451         | S    | 446.2722  | 223.6397        | 429.2456  | 215.1264         | 428.2616       | 214.6344         | 4  |
| 10 | 926.5306  | 463.7689        | 909.5040  | 455.2556         | 908.5200       | 454.7636         | A    | 359.2401  | 180.1237        | 342.2136  | 171.6104         |                |                  | 3  |
| 11 | 1039.6146 | 520.3109        | 1022.5881 | 511.7977         | 1021.6041      | 511.3057         | L    | 288.2030  | 144.6051        | 271.1765  | 136.0919         |                |                  | 2  |
| 12 |           |                 |           |                  |                |                  | R    | 175.1190  | 88.0631         | 158.0924  | 79.5498          |                |                  | 1  |

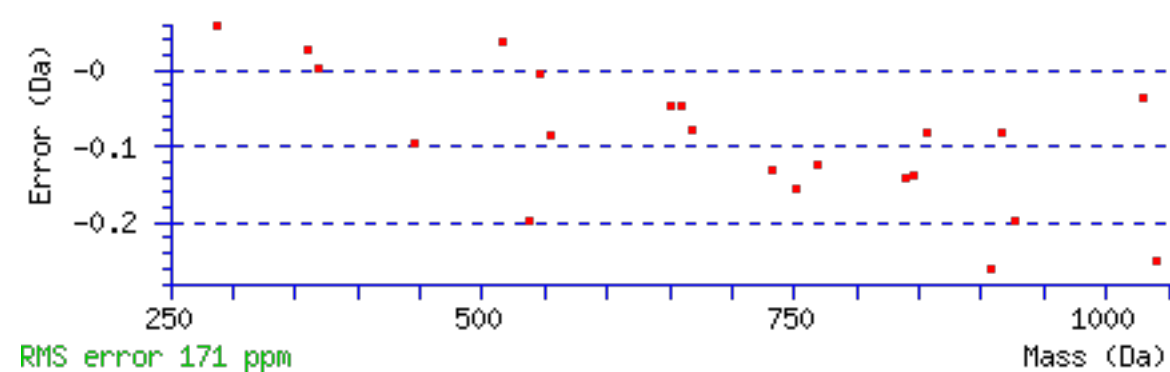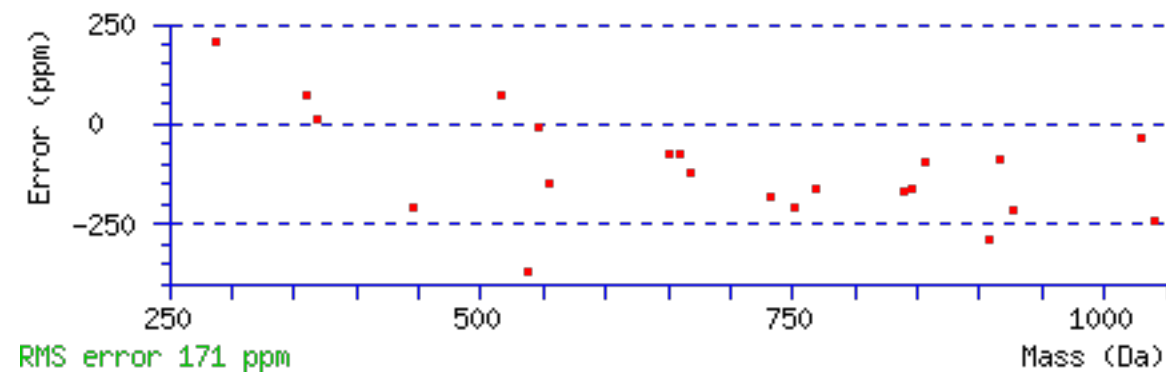

NCBI BLAST search of [ALLANALTSALR](#)

(Parameters: blastp, nr protein database, expect=20000, no filter, PAM30)

Other BLAST [web gateways](#)

All matches to this query

| Score | $M_r(\text{calc})$ | Delta   | Sequence                     |
|-------|--------------------|---------|------------------------------|
| 94.7  | 1212.7190          | -0.4935 | <a href="#">ALLANALTSALR</a> |
| 14.3  | 1214.6407          | -2.4153 | <a href="#">WIAQDLSNLR</a>   |
| 14.2  | 1212.6574          | -0.4320 | <a href="#">ARLAGEEQALR</a>  |
| 13.7  | 1212.6107          | -0.3853 | <a href="#">GMFMLRGTLR</a>   |
| 13.5  | 1209.6717          | 2.5537  | <a href="#">GTISSTITEKR</a>  |

|      |           |         |                               |
|------|-----------|---------|-------------------------------|
| 12.2 | 1213.7030 | -1.4776 | <a href="#">LVPSDRTSLVK</a>   |
| 12.1 | 1214.7234 | -2.4980 | <a href="#">VLSAQVGLSLTK</a>  |
| 11.8 | 1211.6986 | 0.5268  | <a href="#">GRGPGTGALSIVK</a> |
| 11.6 | 1209.6466 | 2.5789  | <a href="#">NGALSLGLGSHGK</a> |
| 10.5 | 1212.6033 | -0.3779 | <a href="#">RTTSEVPMHR</a>    |

**Mascot:** <http://www.matrixscience.com/>
