# Supplementary material
Source: PubMed Central journal article supplement (PMC4223491)
Supplement: supp_M114.040196_mcp.M114.040196-5.pdf [file supp_M114.040196_mcp.M114.040196-5.pdf]

## Peptide View

MS/MS Fragmentation of **ILLNPVQVFDVTK**

Found in **gi19506541**, diacylglycerol kinase epsilon [Mus musculus]

Match to Query 9320: 1485.805448 from(743.910000,2+) intensity(32282.5762) rtinseconds(2377.8054) index(6513)

Title: 15859\_20130128\_Glp1r\_mouse.7857.7857.

Data file 15859\_20130128\_Glp1r\_mouse.mgf

Click mouse within plot area to zoom in by factor of two about that point

Or,   to  Da

Label all possible matches  Label matches used for scoring

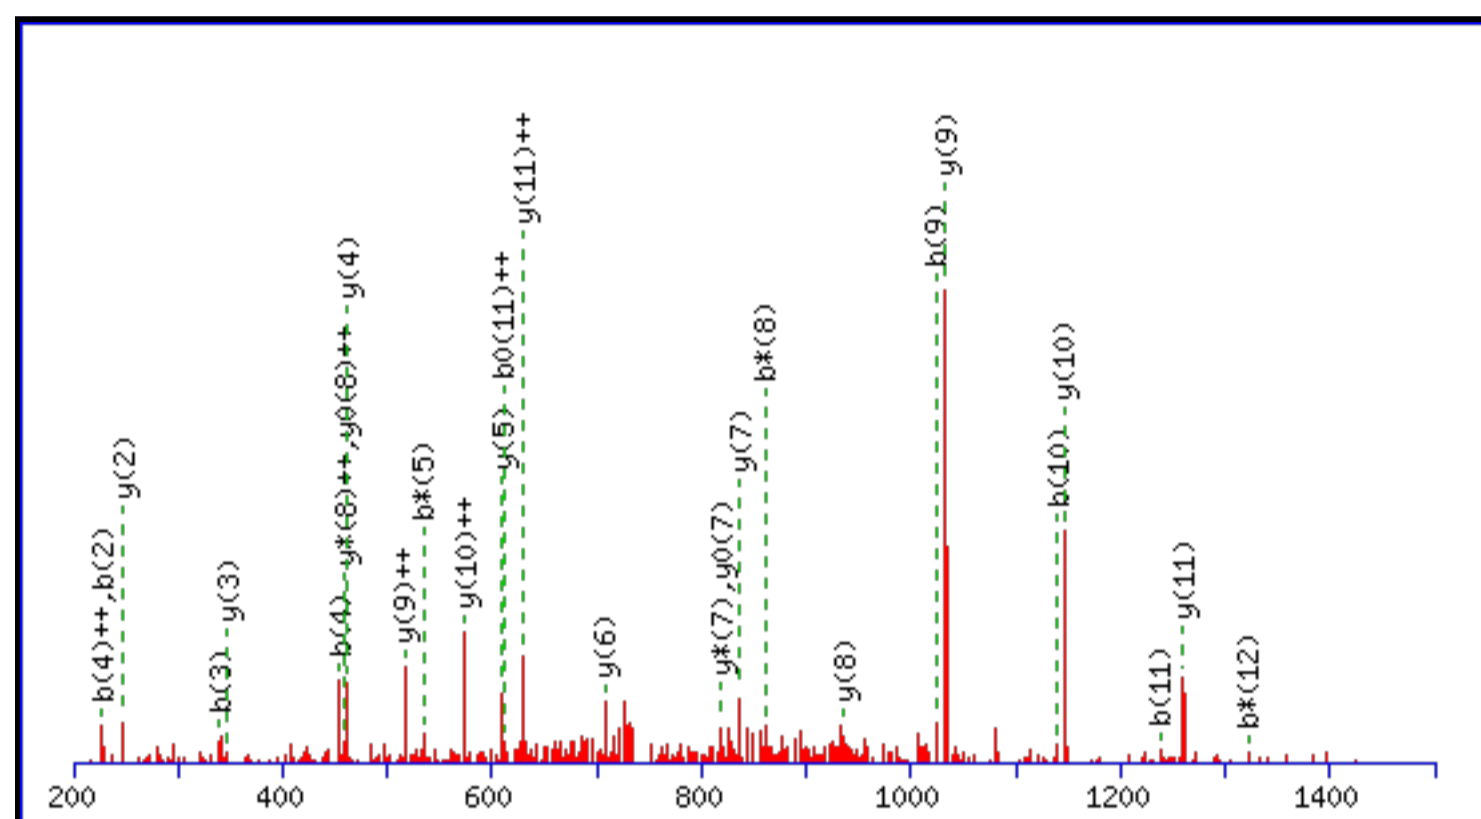

**Monoisotopic mass of neutral peptide Mr(calc):** 1484.8603

**Fixed modifications:** Carbamidomethyl (C) (apply to specified residues or termini only)

**Ions Score:** 63 **Expect:** 0.00041

**Matches :** 28/118 fragment ions using 49 most intense peaks ([help](#))

| #  | b                | b <sup>++</sup> | b <sup>*</sup>   | b <sup>*++</sup> | b <sup>0</sup> | b <sup>0++</sup> | Seq. | y                | y <sup>++</sup> | y <sup>*</sup>  | y <sup>*++</sup> | y <sup>0</sup>  | y <sup>0++</sup> | #  |
|----|------------------|-----------------|------------------|------------------|----------------|------------------|------|------------------|-----------------|-----------------|------------------|-----------------|------------------|----|
| 1  | 114.0913         | 57.5493         |                  |                  |                |                  | I    |                  |                 |                 |                  |                 |                  | 13 |
| 2  | <b>227.1754</b>  | 114.0913        |                  |                  |                |                  | L    | 1372.7835        | 686.8954        | 1355.7569       | 678.3821         | 1354.7729       | 677.8901         | 12 |
| 3  | <b>340.2595</b>  | 170.6334        |                  |                  |                |                  | L    | <b>1259.6994</b> | <b>630.3533</b> | 1242.6729       | 621.8401         | 1241.6889       | 621.3481         | 11 |
| 4  | <b>454.3024</b>  | <b>227.6548</b> | 437.2758         | 219.1416         |                |                  | N    | <b>1146.6154</b> | <b>573.8113</b> | 1129.5888       | 565.2980         | 1128.6048       | 564.8060         | 10 |
| 5  | 551.3552         | 276.1812        | <b>534.3286</b>  | 267.6679         |                |                  | P    | <b>1032.5724</b> | <b>516.7899</b> | 1015.5459       | 508.2766         | 1014.5619       | 507.7846         | 9  |
| 6  | 650.4236         | 325.7154        | 633.3970         | 317.2022         |                |                  | V    | <b>935.5197</b>  | 468.2635        | 918.4931        | <b>459.7502</b>  | 917.5091        | <b>459.2582</b>  | 8  |
| 7  | 778.4822         | 389.7447        | 761.4556         | 381.2314         |                |                  | Q    | <b>836.4512</b>  | 418.7293        | <b>819.4247</b> | 410.2160         | <b>818.4407</b> | 409.7240         | 7  |
| 8  | 877.5506         | 439.2789        | <b>860.5240</b>  | 430.7656         |                |                  | V    | <b>708.3927</b>  | 354.7000        | 691.3661        | 346.1867         | 690.3821        | 345.6947         | 6  |
| 9  | <b>1024.6190</b> | 512.8131        | 1007.5924        | 504.2999         |                |                  | F    | <b>609.3243</b>  | 305.1658        | 592.2977        | 296.6525         | 591.3137        | 296.1605         | 5  |
| 10 | <b>1139.6459</b> | 570.3266        | 1122.6194        | 561.8133         | 1121.6354      | 561.3213         | D    | <b>462.2558</b>  | 231.6316        | 445.2293        | 223.1183         | 444.2453        | 222.6263         | 4  |
| 11 | <b>1238.7143</b> | 619.8608        | 1221.6878        | 611.3475         | 1220.7038      | <b>610.8555</b>  | V    | <b>347.2289</b>  | 174.1181        | 330.2023        | 165.6048         | 329.2183        | 165.1128         | 3  |
| 12 | 1339.7620        | 670.3846        | <b>1322.7355</b> | 661.8714         | 1321.7514      | 661.3794         | T    | <b>248.1605</b>  | 124.5839        | 231.1339        | 116.0706         | 230.1499        | 115.5786         | 2  |
| 13 |                  |                 |                  |                  |                |                  | K    | 147.1128         | 74.0600         | 130.0863        | 65.5468          |                 |                  | 1  |

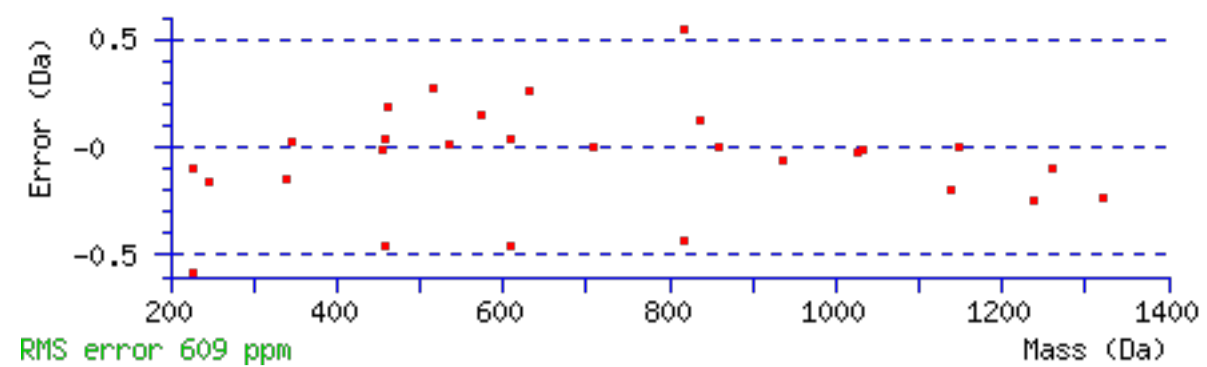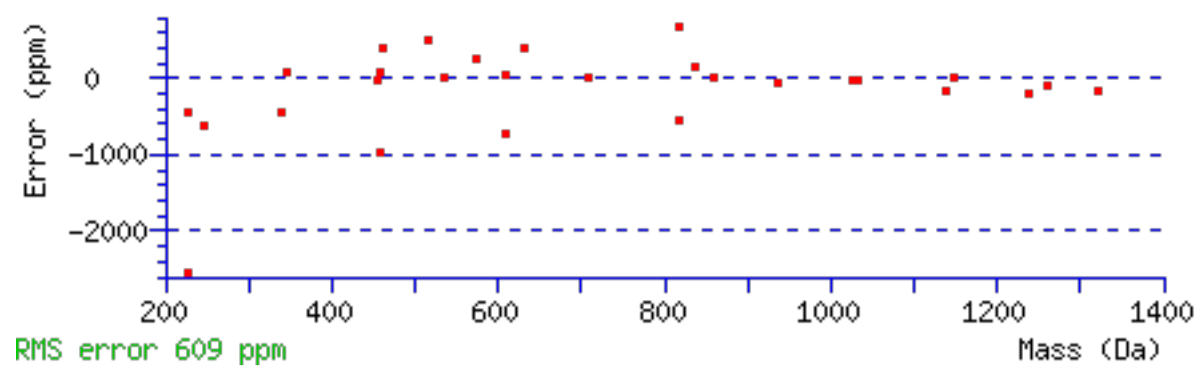

NCBI BLAST search of [ILLNPVQVFDVTK](#)

(Parameters: blastp, nr protein database, expect=20000, no filter, PAM30)

Other BLAST [web gateways](#)

**All matches to this query**

| Score | Mr(calc): | Delta   | Sequence                       |
|-------|-----------|---------|--------------------------------|
| 62.6  | 1484.8603 | 0.9452  | <a href="#">ILLNPVQVFDVTK</a>  |
| 17.4  | 1487.7766 | -1.9711 | <a href="#">QTLNVLEEVCKR</a>   |
| 15.6  | 1485.7940 | 0.0115  | <a href="#">ILNLRDQQFPDK</a>   |
| 13.4  | 1485.8780 | -0.0725 | <a href="#">RALGPGIPHIINTK</a> |
| 13.1  | 1484.8715 | 0.9340  | <a href="#">LLNIPINDIVHPK</a>  |
| 12.8  | 1484.8450 | 0.9604  | <a href="#">KPLDVTASSLVDLK</a> |
| 10.9  | 1484.7697 | 1.0357  | <a href="#">IILNFTSMDLYR</a>   |
| 10.8  | 1485.7948 | 0.0106  | <a href="#">KVIGGMVWNPVMR</a>  |
| 7.2   | 1485.7762 | 0.0292  | <a href="#">LLINSVFHMGAER</a>  |
| 6.5   | 1487.6602 | -1.8548 | <a href="#">VEINPPDDMEWK</a>   |

Mascot: <http://www.matrixscience.com/>

## Peptide View

MS/MS Fragmentation of **SDPLLMGIPTSENPFK**

Found in **gi13384618**, guanine nucleotide-binding protein G(I)/G(S)/G(O) subunit gamma-12 [Mus musculus]

Match to Query 11651: 1745.545448 from(873.780000,2+) intensity(39879.7344) rtinseconds(2290.7407) index(6283)

Title: 15859\_20130128\_Glp1r\_mouse.7581.7581.

Data file 15859\_20130128\_Glp1r\_mouse.mgf

Click mouse within plot area to zoom in by factor of two about that point

Or,   to  Da

Label all possible matches  Label matches used for scoring

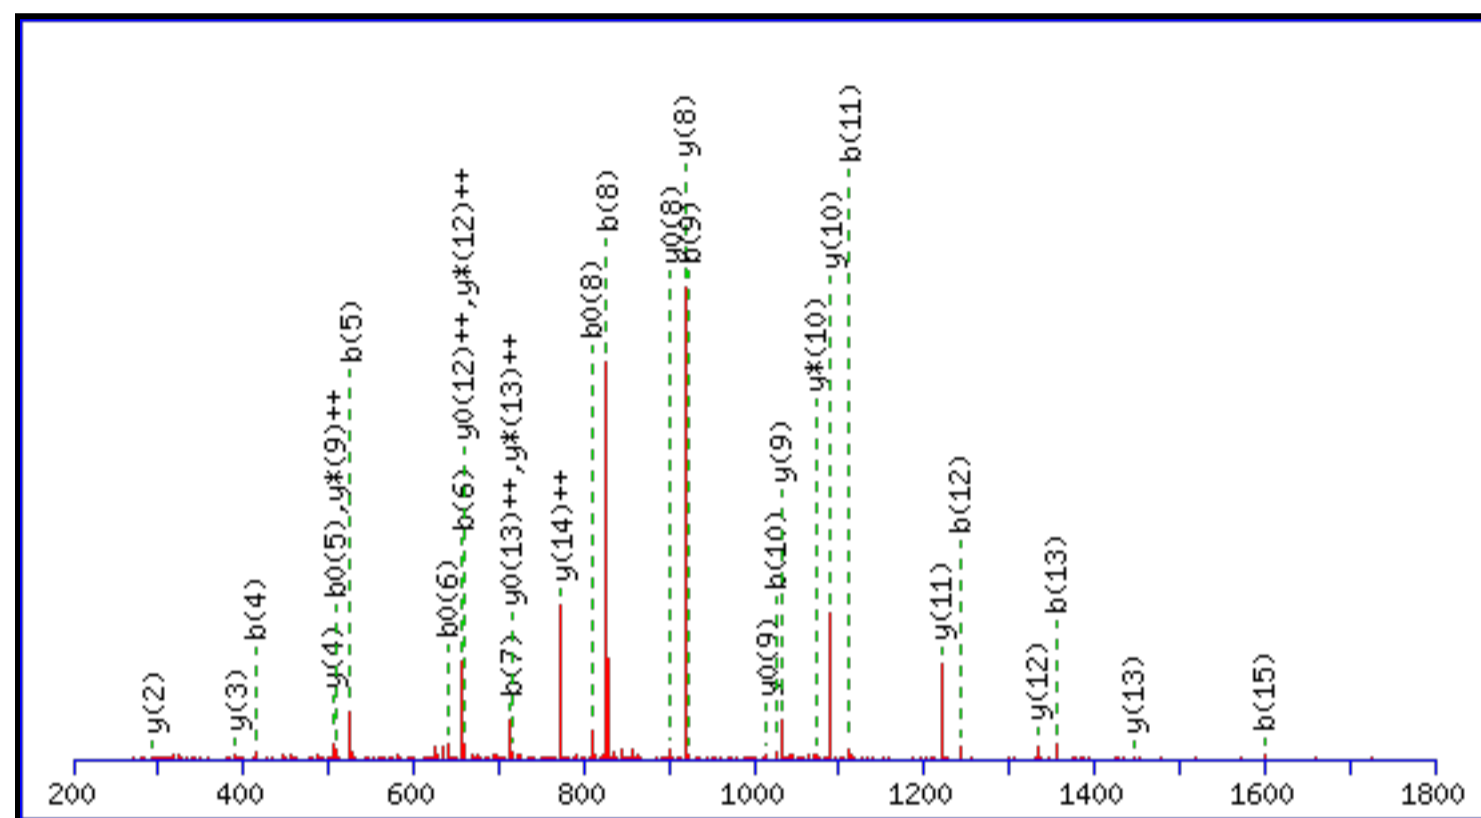

**Monoisotopic mass of neutral peptide Mr(calc):** 1744.8706

**Fixed modifications:** Carbamidomethyl (C) (apply to specified residues or termini only)

**Ions Score:** 67 **Expect:** 0.00014

**Matches :** 32/148 fragment ions using 55 most intense peaks ([help](#))

| #  | b         | b <sup>++</sup> | b*        | b <sup>+++</sup> | b <sup>0</sup> | b <sup>0++</sup> | Seq. | y         | y <sup>++</sup> | y*        | y <sup>+++</sup> | y <sup>0</sup> | y <sup>0++</sup> | #  |
|----|-----------|-----------------|-----------|------------------|----------------|------------------|------|-----------|-----------------|-----------|------------------|----------------|------------------|----|
| 1  | 88.0393   | 44.5233         |           |                  | 70.0287        | 35.5180          | S    |           |                 |           |                  |                |                  | 16 |
| 2  | 203.0662  | 102.0368        |           |                  | 185.0557       | 93.0315          | D    | 1658.8458 | 829.9265        | 1641.8193 | 821.4133         | 1640.8353      | 820.9213         | 15 |
| 3  | 300.1190  | 150.5631        |           |                  | 282.1084       | 141.5579         | P    | 1543.8189 | 772.4131        | 1526.7923 | 763.8998         | 1525.8083      | 763.4078         | 14 |
| 4  | 413.2031  | 207.1052        |           |                  | 395.1925       | 198.0999         | L    | 1446.7661 | 723.8867        | 1429.7396 | 715.3734         | 1428.7555      | 714.8814         | 13 |
| 5  | 526.2871  | 263.6472        |           |                  | 508.2766       | 254.6419         | L    | 1333.6821 | 667.3447        | 1316.6555 | 658.8314         | 1315.6715      | 658.3394         | 12 |
| 6  | 657.3276  | 329.1675        |           |                  | 639.3171       | 320.1622         | M    | 1220.5980 | 610.8026        | 1203.5714 | 602.2894         | 1202.5874      | 601.7973         | 11 |
| 7  | 714.3491  | 357.6782        |           |                  | 696.3385       | 348.6729         | G    | 1089.5575 | 545.2824        | 1072.5310 | 536.7691         | 1071.5469      | 536.2771         | 10 |
| 8  | 827.4332  | 414.2202        |           |                  | 809.4226       | 405.2149         | I    | 1032.5360 | 516.7717        | 1015.5095 | 508.2584         | 1014.5255      | 507.7664         | 9  |
| 9  | 924.4859  | 462.7466        |           |                  | 906.4754       | 453.7413         | P    | 919.4520  | 460.2296        | 902.4254  | 451.7164         | 901.4414       | 451.2243         | 8  |
| 10 | 1025.5336 | 513.2704        |           |                  | 1007.5230      | 504.2652         | T    | 822.3992  | 411.7032        | 805.3727  | 403.1900         | 804.3886       | 402.6980         | 7  |
| 11 | 1112.5656 | 556.7864        |           |                  | 1094.5551      | 547.7812         | S    | 721.3515  | 361.1794        | 704.3250  | 352.6661         | 703.3410       | 352.1741         | 6  |
| 12 | 1241.6082 | 621.3077        |           |                  | 1223.5977      | 612.3025         | E    | 634.3195  | 317.6634        | 617.2930  | 309.1501         | 616.3089       | 308.6581         | 5  |
| 13 | 1355.6511 | 678.3292        | 1338.6246 | 669.8159         | 1337.6406      | 669.3239         | N    | 505.2769  | 253.1421        | 488.2504  | 244.6288         |                |                  | 4  |
| 14 | 1452.7039 | 726.8556        | 1435.6774 | 718.3423         | 1434.6933      | 717.8503         | P    | 391.2340  | 196.1206        | 374.2074  | 187.6074         |                |                  | 3  |
| 15 | 1599.7723 | 800.3898        | 1582.7458 | 791.8765         | 1581.7618      | 791.3845         | F    | 294.1812  | 147.5942        | 277.1547  | 139.0810         |                |                  | 2  |
| 16 |           |                 |           |                  |                |                  | K    | 147.1128  | 74.0600         | 130.0863  | 65.5468          |                |                  | 1  |

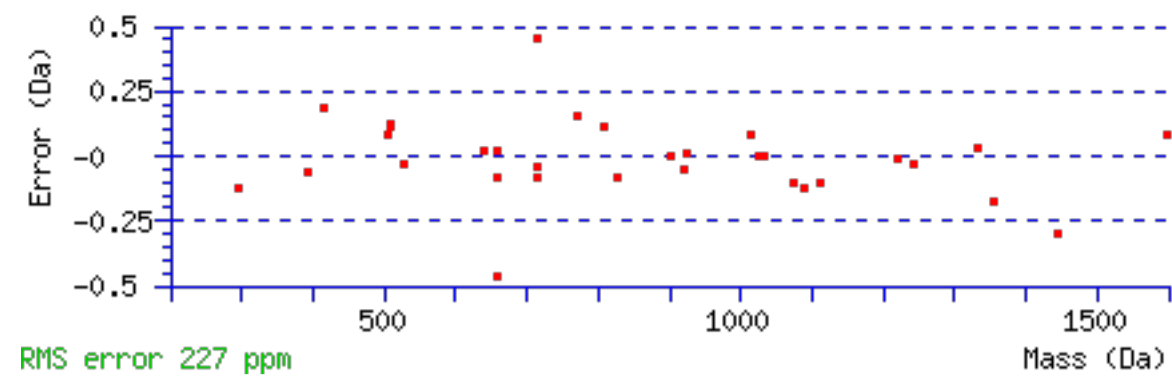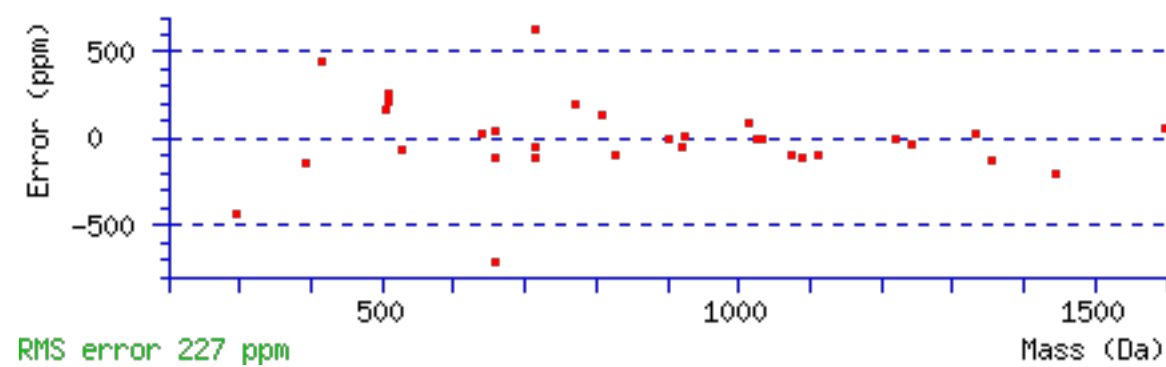

NCBI **BLAST** search of [SDPLLMGIPTSENPFK](#)  
 (Parameters: blastp, nr protein database, expect=20000, no filter, PAM30)  
 Other BLAST [web gateways](#)

**All matches to this query**

| Score | Mr(calc): | Delta   | Sequence                          |
|-------|-----------|---------|-----------------------------------|
| 66.5  | 1744.8706 | 0.6749  | <a href="#">SDPLLMGIPTSENPFK</a>  |
| 13.4  | 1745.8618 | -0.3163 | <a href="#">ELLGNATOPTSCASGLK</a> |
| 7.9   | 1745.7340 | -0.1885 | <a href="#">HSEAEGSEKAQSDDEK</a>  |
| 5.3   | 1744.7470 | 0.7985  | <a href="#">NNVTPDMMMEEMYKK</a>   |
| 5.3   | 1744.7470 | 0.7985  | <a href="#">NNVTPDMMMEEMYKK</a>   |
| 3.7   | 1745.9213 | -0.3758 | <a href="#">SGRLLVPAYTYHVDR</a>   |
| 3.2   | 1744.9723 | 0.5731  | <a href="#">HKFSTISTLGDISVLK</a>  |
| 2.2   | 1747.9403 | -2.3949 | <a href="#">HRPAVVMDLIDLTPR</a>   |
| 1.7   | 1746.9516 | -1.4061 | <a href="#">KLSGLSAFDIAEELVR</a>  |
| 1.4   | 1744.0685 | 1.4770  | <a href="#">VYIGKLNMILVQILK</a>   |

Mascot: <http://www.matrixscience.com/>

## Peptide View

MS/MS Fragmentation of **ISSTLYQATAPVLT**PAK

Found in **gi13384696**, keratinocyte-associated protein 2 [Mus musculus]

Match to Query 11744: 1760.645448 from(881.330000,2+) intensity(39946.9609) rtinseconds(1344.8266) index(3736)

Title: 15859\_20130128\_Glp1r\_mouse.4524.4524.

Data file 15859\_20130128\_Glp1r\_mouse.mgf

Click mouse within plot area to zoom in by factor of two about that point

Or,   to  Da

Label all possible matches  Label matches used for scoring

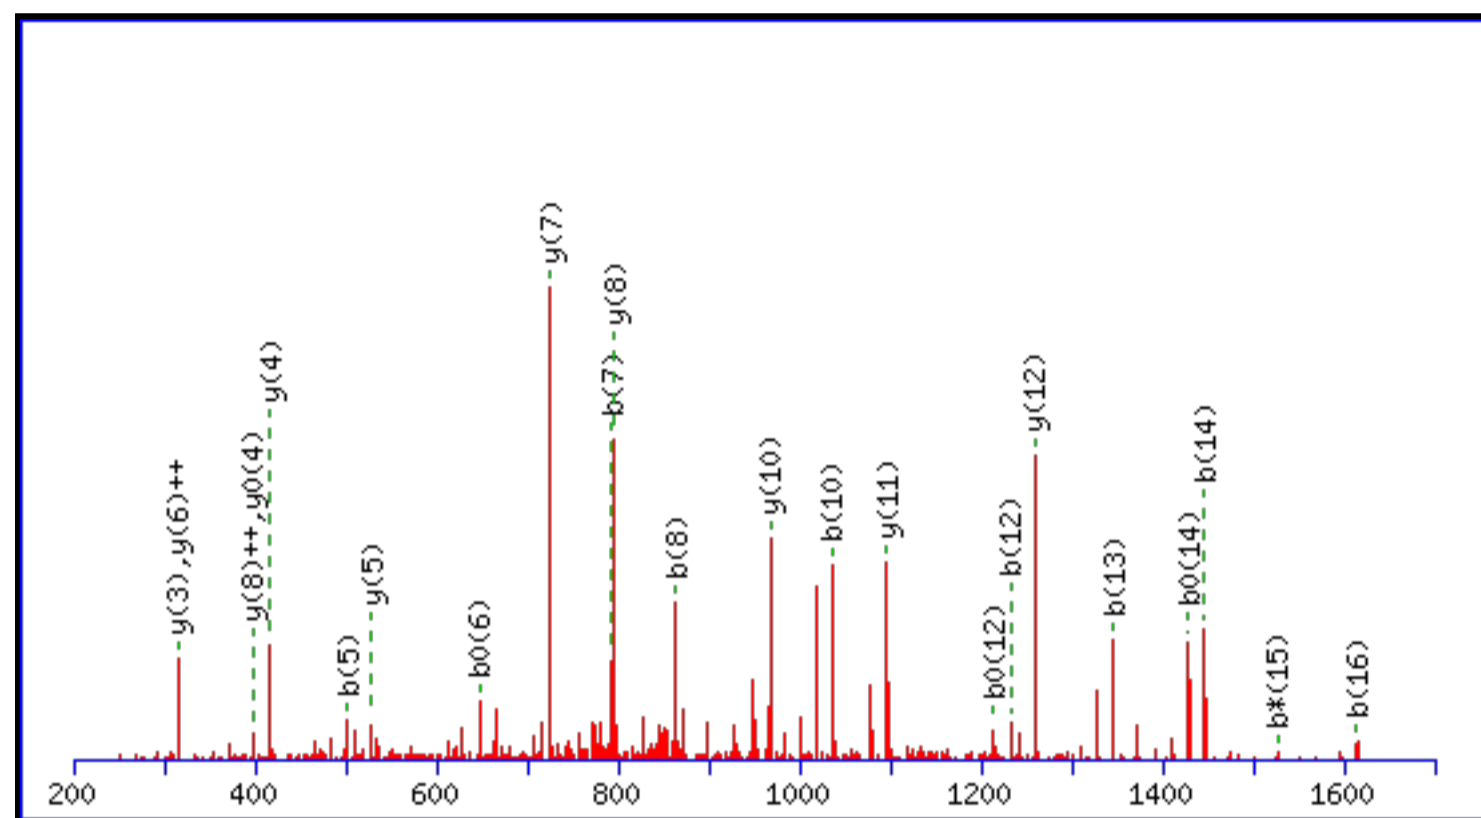

**Monoisotopic mass of neutral peptide Mr(calc):** 1759.9720

**Fixed modifications:** Carbamidomethyl (C) (apply to specified residues or termini only)

**Ions Score:** 70 **Expect:** 6.6e-05

**Matches :** 23/172 fragment ions using 28 most intense peaks ([help](#))

| #  | b                | b <sup>++</sup> | b <sup>*</sup>   | b <sup>*++</sup> | b <sup>0</sup>   | b <sup>0++</sup> | Seq. | y                | y <sup>++</sup> | y <sup>*</sup> | y <sup>*++</sup> | y <sup>0</sup>  | y <sup>0++</sup> | #  |
|----|------------------|-----------------|------------------|------------------|------------------|------------------|------|------------------|-----------------|----------------|------------------|-----------------|------------------|----|
| 1  | 114.0913         | 57.5493         |                  |                  |                  |                  | I    |                  |                 |                |                  |                 |                  | 17 |
| 2  | 201.1234         | 101.0653        |                  |                  | 183.1128         | 92.0600          | S    | 1647.8952        | 824.4512        | 1630.8687      | 815.9380         | 1629.8847       | 815.4460         | 16 |
| 3  | 288.1554         | 144.5813        |                  |                  | 270.1448         | 135.5761         | S    | 1560.8632        | 780.9352        | 1543.8366      | 772.4220         | 1542.8526       | 771.9299         | 15 |
| 4  | 389.2031         | 195.1052        |                  |                  | 371.1925         | 186.0999         | T    | 1473.8312        | 737.4192        | 1456.8046      | 728.9059         | 1455.8206       | 728.4139         | 14 |
| 5  | <b>502.2871</b>  | 251.6472        |                  |                  | 484.2766         | 242.6419         | L    | 1372.7835        | 686.8954        | 1355.7569      | 678.3821         | 1354.7729       | 677.8901         | 13 |
| 6  | 665.3505         | 333.1789        |                  |                  | <b>647.3399</b>  | 324.1736         | Y    | <b>1259.6994</b> | 630.3533        | 1242.6729      | 621.8401         | 1241.6889       | 621.3481         | 12 |
| 7  | <b>793.4090</b>  | 397.2082        | 776.3825         | 388.6949         | 775.3985         | 388.2029         | Q    | <b>1096.6361</b> | 548.8217        | 1079.6095      | 540.3084         | 1078.6255       | 539.8164         | 11 |
| 8  | <b>864.4462</b>  | 432.7267        | 847.4196         | 424.2134         | 846.4356         | 423.7214         | A    | <b>968.5775</b>  | 484.7924        | 951.5510       | 476.2791         | 950.5669        | 475.7871         | 10 |
| 9  | 965.4938         | 483.2506        | 948.4673         | 474.7373         | 947.4833         | 474.2453         | T    | 897.5404         | 449.2738        | 880.5138       | 440.7606         | 879.5298        | 440.2686         | 9  |
| 10 | <b>1036.5310</b> | 518.7691        | 1019.5044        | 510.2558         | 1018.5204        | 509.7638         | A    | <b>796.4927</b>  | <b>398.7500</b> | 779.4662       | 390.2367         | 778.4822        | 389.7447         | 8  |
| 11 | 1133.5837        | 567.2955        | 1116.5572        | 558.7822         | 1115.5732        | 558.2902         | P    | <b>725.4556</b>  | 363.2314        | 708.4291       | 354.7182         | 707.4450        | 354.2262         | 7  |
| 12 | <b>1232.6521</b> | 616.8297        | 1215.6256        | 608.3164         | <b>1214.6416</b> | 607.8244         | V    | 628.4028         | <b>314.7051</b> | 611.3763       | 306.1918         | 610.3923        | 305.6998         | 6  |
| 13 | <b>1345.7362</b> | 673.3717        | 1328.7096        | 664.8585         | 1327.7256        | 664.3665         | L    | <b>529.3344</b>  | 265.1709        | 512.3079       | 256.6576         | 511.3239        | 256.1656         | 5  |
| 14 | <b>1446.7839</b> | 723.8956        | 1429.7573        | 715.3823         | <b>1428.7733</b> | 714.8903         | T    | <b>416.2504</b>  | 208.6288        | 399.2238       | 200.1155         | <b>398.2398</b> | 199.6235         | 4  |
| 15 | 1543.8366        | 772.4220        | <b>1526.8101</b> | 763.9087         | 1525.8261        | 763.4167         | P    | <b>315.2027</b>  | 158.1050        | 298.1761       | 149.5917         |                 |                  | 3  |
| 16 | <b>1614.8738</b> | 807.9405        | 1597.8472        | 799.4272         | 1596.8632        | 798.9352         | A    | 218.1499         | 109.5786        | 201.1234       | 101.0653         |                 |                  | 2  |
| 17 |                  |                 |                  |                  |                  |                  | K    | 147.1128         | 74.0600         | 130.0863       | 65.5468          |                 |                  | 1  |

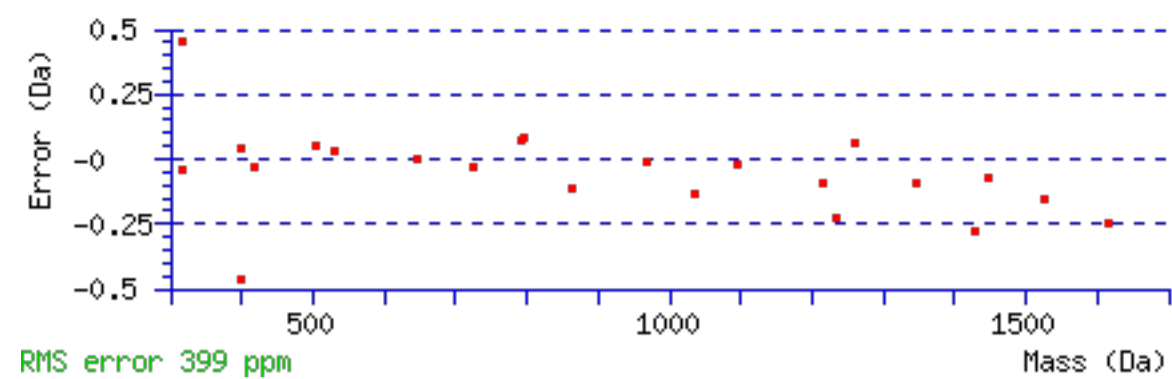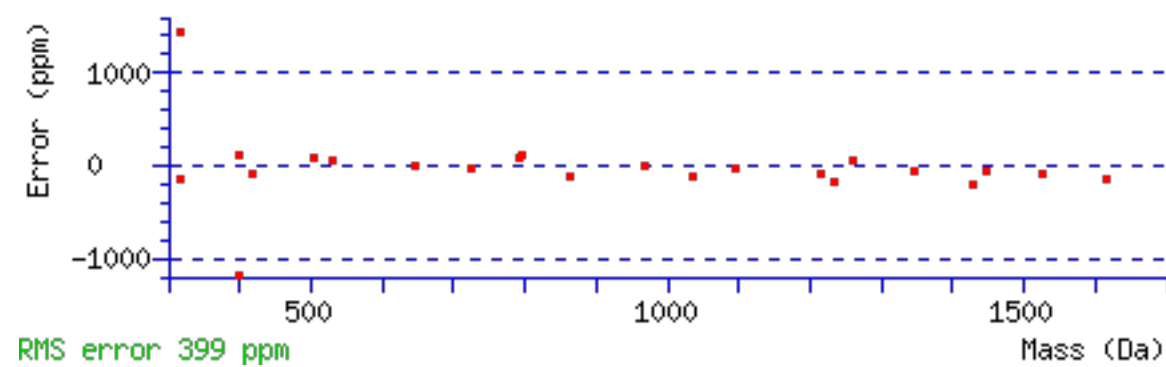

NCBI **BLAST** search of [ISSTLYQATAPVLTPAK](#)  
 (Parameters: blastp, nr protein database, expect=20000, no filter, PAM30)  
 Other BLAST [web gateways](#)

**All matches to this query**

| Score | Mr(calc): | Delta   | Sequence                           |
|-------|-----------|---------|------------------------------------|
| 69.7  | 1759.9720 | 0.6735  | <a href="#">ISSTLYQATAPVLTPAK</a>  |
| 7.5   | 1758.8069 | 1.8385  | <a href="#">CYLYQARDLPAMDK</a>     |
| 6.3   | 1760.8801 | -0.2346 | <a href="#">TTMGLLVVHKEGEGMK</a>   |
| 3.4   | 1759.8682 | 0.7773  | <a href="#">APFYWDDAHLRIEK</a>     |
| 3.4   | 1760.9165 | -0.2710 | <a href="#">VVTATGTLALGINMPCK</a>  |
| 2.5   | 1759.9073 | 0.7382  | <a href="#">AAQLCGAGMAAVVEKIR</a>  |
| 2.1   | 1759.8887 | 0.7568  | <a href="#">QLRMPNEVTSTDITR</a>    |
| 1.8   | 1762.9690 | -2.3235 | <a href="#">QGLIKQQQQIPNPSGK</a>   |
| 1.4   | 1759.8662 | 0.7793  | <a href="#">TGOELKEAALEPSMEK</a>   |
| 0.2   | 1759.0356 | 1.6098  | <a href="#">SGLLLHGPPGTGKTLLAK</a> |

**Mascot:** <http://www.matrixscience.com/>



# Mascot Search Results

## Peptide View

MS/MS Fragmentation of **LDWTSLLPSSIK**

Found in **gil30520239**, neutral cholesterol ester hydrolase 1 [Mus musculus]

Match to Query 6844: 1359.345448 from(680.680000,2+) intensity(8220.8672) rtinseconds(2822.01) index(7717)

Title: 16590\_20130315\_min6\_glp1R\_2hrp.09279.09279.0.dta

Data file 16590\_20130315\_min6\_glp1R\_2hrp.mgf

Click mouse within plot area to zoom in by factor of two about that point

Or, Plot from  to  Da

Label all possible matches  Label matches used for scoring

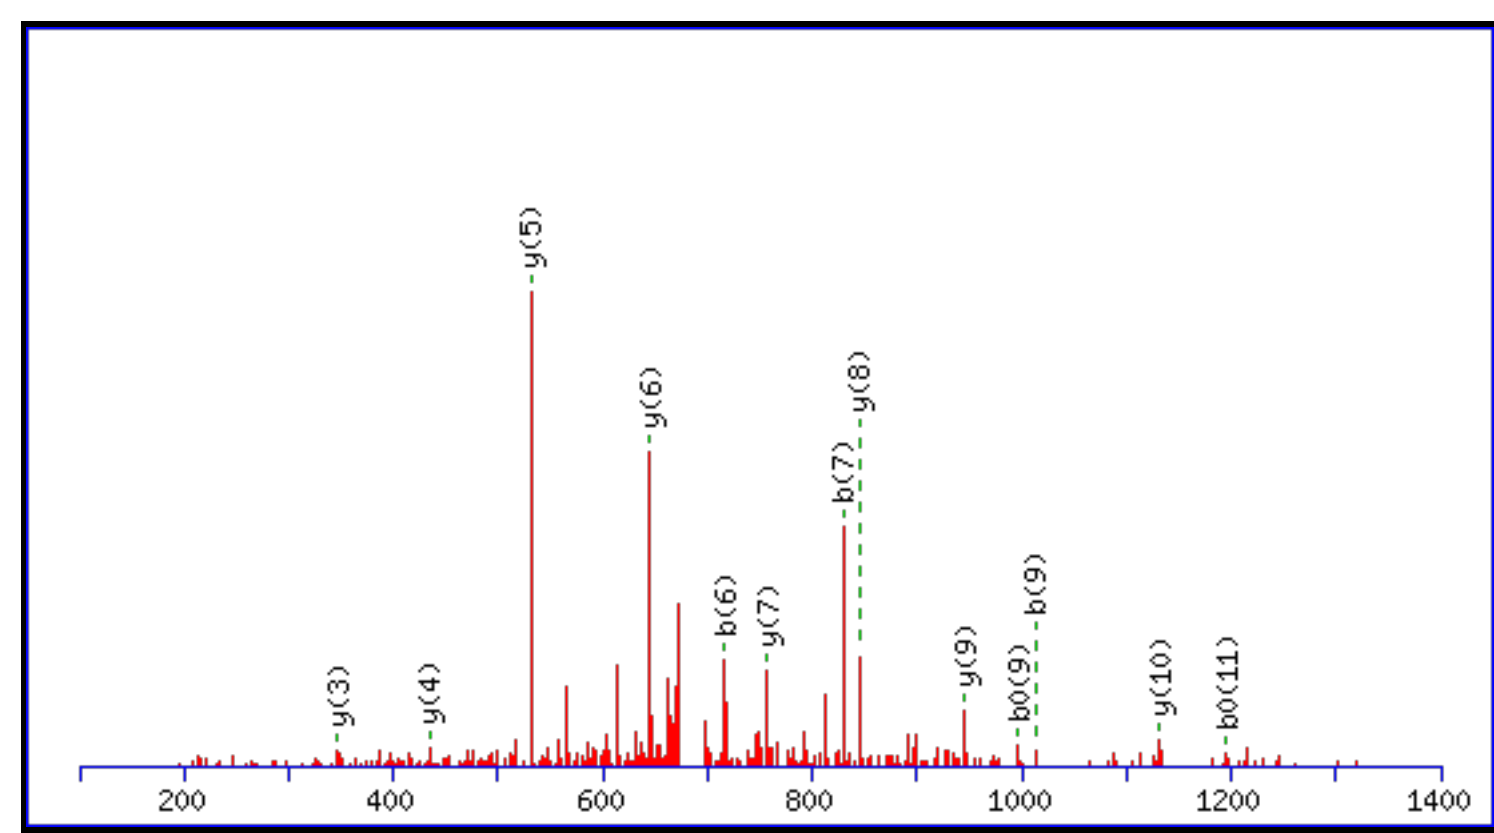

**Monoisotopic mass of neutral peptide Mr(calc):** 1358.7446

**Fixed modifications:** Carbamidomethyl (C) (apply to specified residues or termini only)

**Ions Score:** 54 **Expect:** 0.0033

**Matches :** 13/104 fragment ions using 24 most intense peaks ([help](#))

| #  | b                | b <sup>++</sup> | b <sup>0</sup>   | b <sup>0++</sup> | Seq. | y                | y <sup>++</sup> | y <sup>*</sup> | y <sup>*++</sup> | y <sup>0</sup> | y <sup>0++</sup> | #  |
|----|------------------|-----------------|------------------|------------------|------|------------------|-----------------|----------------|------------------|----------------|------------------|----|
| 1  | 114.0913         | 57.5493         |                  |                  | L    |                  |                 |                |                  |                |                  | 12 |
| 2  | 229.1183         | 115.0628        | 211.1077         | 106.0575         | D    | 1246.6678        | 623.8375        | 1229.6412      | 615.3243         | 1228.6572      | 614.8322         | 11 |
| 3  | 415.1976         | 208.1024        | 397.1870         | 199.0972         | W    | <b>1131.6408</b> | 566.3241        | 1114.6143      | 557.8108         | 1113.6303      | 557.3188         | 10 |
| 4  | 516.2453         | 258.6263        | 498.2347         | 249.6210         | T    | <b>945.5615</b>  | 473.2844        | 928.5350       | 464.7711         | 927.5510       | 464.2791         | 9  |
| 5  | 603.2773         | 302.1423        | 585.2667         | 293.1370         | S    | <b>844.5138</b>  | 422.7606        | 827.4873       | 414.2473         | 826.5033       | 413.7553         | 8  |
| 6  | <b>716.3614</b>  | 358.6843        | 698.3508         | 349.6790         | L    | <b>757.4818</b>  | 379.2445        | 740.4553       | 370.7313         | 739.4713       | 370.2393         | 7  |
| 7  | <b>829.4454</b>  | 415.2264        | 811.4349         | 406.2211         | L    | <b>644.3978</b>  | 322.7025        | 627.3712       | 314.1892         | 626.3872       | 313.6972         | 6  |
| 8  | 926.4982         | 463.7527        | 908.4876         | 454.7475         | P    | <b>531.3137</b>  | 266.1605        | 514.2871       | 257.6472         | 513.3031       | 257.1552         | 5  |
| 9  | <b>1013.5302</b> | 507.2687        | <b>995.5197</b>  | 498.2635         | S    | <b>434.2609</b>  | 217.6341        | 417.2344       | 209.1208         | 416.2504       | 208.6288         | 4  |
| 10 | 1100.5623        | 550.7848        | 1082.5517        | 541.7795         | S    | <b>347.2289</b>  | 174.1181        | 330.2023       | 165.6048         | 329.2183       | 165.1128         | 3  |
| 11 | 1213.6463        | 607.3268        | <b>1195.6357</b> | 598.3215         | I    | 260.1969         | 130.6021        | 243.1703       | 122.0888         |                |                  | 2  |

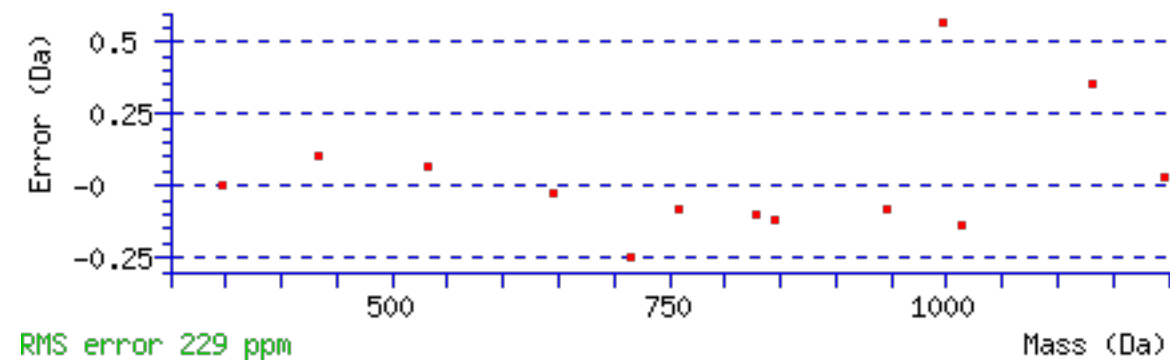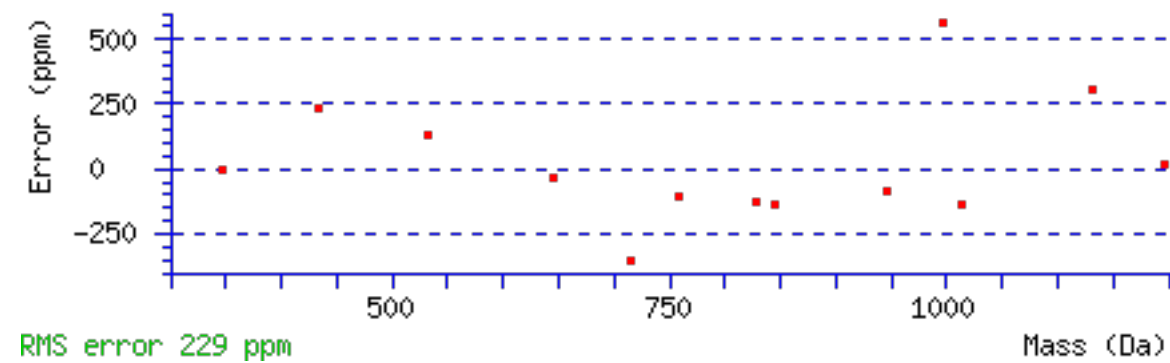

NCBI BLAST search of [LDWTSLLPSSIK](#)

(Parameters: blastp, nr protein database, expect=20000, no filter, PAM30)

Other BLAST [web gateways](#)

### All matches to this query

| Score | Mr(calc): | Delta   | Sequence                      |
|-------|-----------|---------|-------------------------------|
| 54.0  | 1358.7446 | 0.6009  | <a href="#">LDWTSLLPSSIK</a>  |
| 12.7  | 1358.8173 | 0.5281  | <a href="#">FAALITVLALAEK</a> |
| 9.8   | 1358.7531 | 0.5924  | <a href="#">FQGLRARPSTAR</a>  |
| 9.1   | 1360.7020 | -1.3566 | <a href="#">MELSQLLNEIR</a>   |
| 8.4   | 1358.8021 | 0.5434  | <a href="#">EKTLILLDVSTK</a>  |
| 7.7   | 1358.5959 | 0.7496  | <a href="#">YRGMGSLDAMDK</a>  |
| 6.2   | 1357.7864 | 1.5591  | <a href="#">MIATGGLLRISAR</a> |
| 4.7   | 1360.6809 | -1.3355 | <a href="#">FPKGTDATMLHK</a>  |
| 4.3   | 1360.7384 | -1.3930 | <a href="#">VMLQVNGKELSK</a>  |
| 3.7   | 1356.5438 | 2.8016  | <a href="#">DCHVEPCPESK</a>   |

Mascot: <http://www.matrixscience.com/>



## Peptide View

MS/MS Fragmentation of **ELTLQAMADGVNK**

Found in **gil6679229**, neuroendocrine convertase 2 precursor [Mus musculus]

Match to Query 8404: 1389.725448 from(695.870000,2+) intensity(31416.9336) rtinseconds(1388.4489) index(3856)

Title: 15859\_20130128\_Glp1r\_mouse.4668.4668.

Data file 15859\_20130128\_Glp1r\_mouse.mgf

Click mouse within plot area to zoom in by factor of two about that point

Or,   to  Da

Label all possible matches  Label matches used for scoring

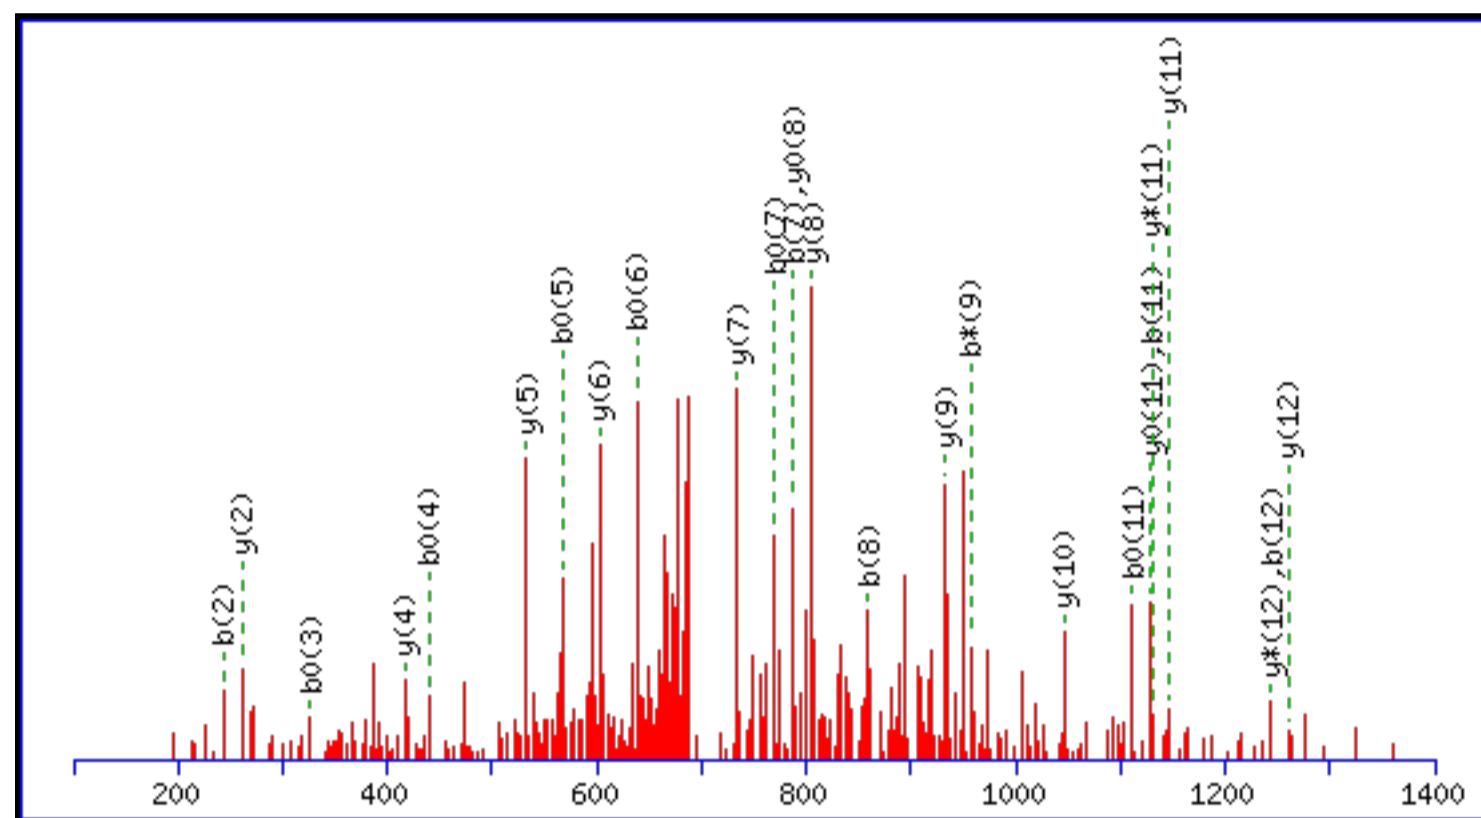

**Monoisotopic mass of neutral peptide Mr(calc):** 1388.6969

**Fixed modifications:** Carbamidomethyl (C) (apply to specified residues or termini only)

**Ions Score:** 64 **Expect:** 0.00035

**Matches :** 26/128 fragment ions using 47 most intense peaks ([help](#))

| #  | b                | b <sup>++</sup> | b*              | b <sup>+++</sup> | b <sup>0</sup>   | b <sup>0++</sup> | Seq. | y                | y <sup>++</sup> | y*               | y <sup>+++</sup> | y <sup>0</sup>   | y <sup>0++</sup> | #  |
|----|------------------|-----------------|-----------------|------------------|------------------|------------------|------|------------------|-----------------|------------------|------------------|------------------|------------------|----|
| 1  | 130.0499         | 65.5286         |                 |                  | 112.0393         | 56.5233          | E    |                  |                 |                  |                  |                  |                  | 13 |
| 2  | <b>243.1339</b>  | 122.0706        |                 |                  | 225.1234         | 113.0653         | L    | <b>1260.6617</b> | 630.8345        | <b>1243.6351</b> | 622.3212         | 1242.6511        | 621.8292         | 12 |
| 3  | 344.1816         | 172.5944        |                 |                  | <b>326.1710</b>  | 163.5892         | T    | <b>1147.5776</b> | 574.2924        | <b>1130.5510</b> | 565.7792         | <b>1129.5670</b> | 565.2871         | 11 |
| 4  | 457.2657         | 229.1365        |                 |                  | <b>439.2551</b>  | 220.1312         | L    | <b>1046.5299</b> | 523.7686        | 1029.5034        | 515.2553         | 1028.5193        | 514.7633         | 10 |
| 5  | 585.3243         | 293.1658        | 568.2977        | 284.6525         | <b>567.3137</b>  | 284.1605         | Q    | <b>933.4458</b>  | 467.2266        | 916.4193         | 458.7133         | 915.4353         | 458.2213         | 9  |
| 6  | 656.3614         | 328.6843        | 639.3348        | 320.1710         | <b>638.3508</b>  | 319.6790         | A    | <b>805.3873</b>  | 403.1973        | 788.3607         | 394.6840         | <b>787.3767</b>  | 394.1920         | 8  |
| 7  | <b>787.4019</b>  | 394.2046        | 770.3753        | 385.6913         | <b>769.3913</b>  | 385.1993         | M    | <b>734.3502</b>  | 367.6787        | 717.3236         | 359.1654         | 716.3396         | 358.6734         | 7  |
| 8  | <b>858.4390</b>  | 429.7231        | 841.4124        | 421.2098         | 840.4284         | 420.7178         | A    | <b>603.3097</b>  | 302.1585        | 586.2831         | 293.6452         | 585.2991         | 293.1532         | 6  |
| 9  | 973.4659         | 487.2366        | <b>956.4394</b> | 478.7233         | 955.4553         | 478.2313         | D    | <b>532.2726</b>  | 266.6399        | 515.2460         | 258.1266         | 514.2620         | 257.6346         | 5  |
| 10 | 1030.4874        | 515.7473        | 1013.4608       | 507.2341         | 1012.4768        | 506.7420         | G    | <b>417.2456</b>  | 209.1264        | 400.2191         | 200.6132         |                  |                  | 4  |
| 11 | <b>1129.5558</b> | 565.2815        | 1112.5292       | 556.7683         | <b>1111.5452</b> | 556.2762         | V    | 360.2241         | 180.6157        | 343.1976         | 172.1024         |                  |                  | 3  |
| 12 | <b>1243.5987</b> | 622.3030        | 1226.5722       | 613.7897         | 1225.5882        | 613.2977         | N    | <b>261.1557</b>  | 131.0815        | 244.1292         | 122.5682         |                  |                  | 2  |
| 13 |                  |                 |                 |                  |                  |                  | K    | 147.1128         | 74.0600         | 130.0863         | 65.5468          |                  |                  | 1  |

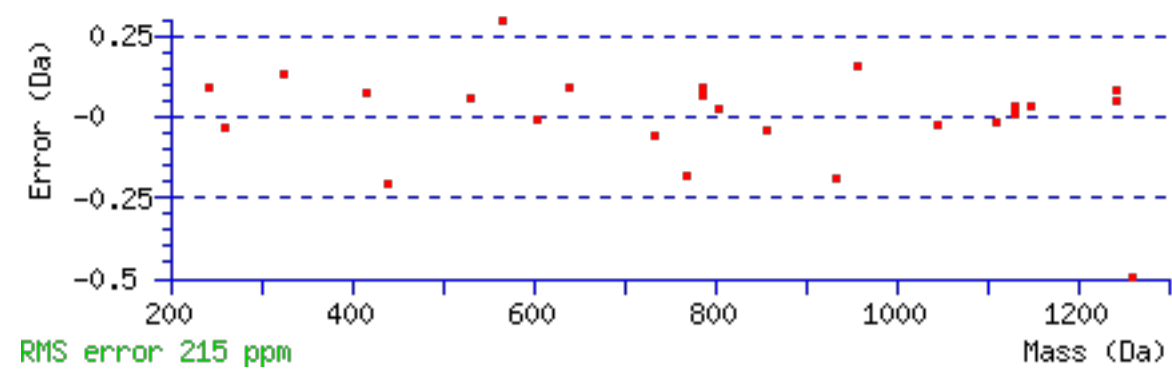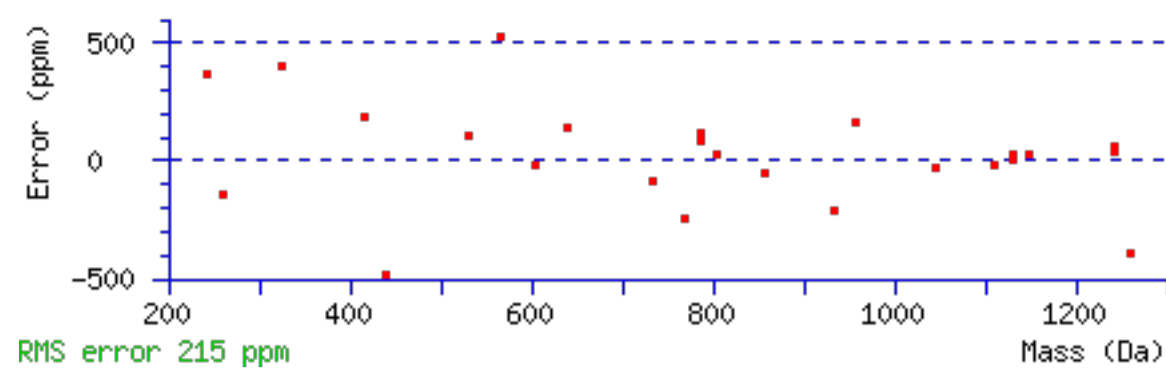

NCBI **BLAST** search of [ELTLQAMADGVNK](#)

(Parameters: blastp, nr protein database, expect=20000, no filter, PAM30)

Other BLAST [web gateways](#)

**All matches to this query**

| Score | Mr(calc): | Delta   | Sequence                      |
|-------|-----------|---------|-------------------------------|
| 63.6  | 1388.6969 | 1.0285  | <a href="#">ELTLQAMADGVNK</a> |
| 7.2   | 1388.6056 | 1.1199  | <a href="#">DAETDGPEKGDQK</a> |
| 4.3   | 1389.6848 | 0.0406  | <a href="#">IEQTNQTEKGSR</a>  |
| 3.3   | 1388.7446 | 0.9809  | <a href="#">AGIRVVMITGDNK</a> |
| 3.3   | 1389.7113 | 0.0142  | <a href="#">EIHSQQVKEHR</a>   |
| 2.6   | 1388.6606 | 1.0649  | <a href="#">ELETQQPCKEK</a>   |
| 2.2   | 1388.6572 | 1.0682  | <a href="#">EDDGKGNFSPVPK</a> |
| 1.7   | 1387.7055 | 2.0199  | <a href="#">QIEDLQGRTSNK</a>  |
| 1.4   | 1390.7642 | -1.0388 | <a href="#">FLRQEMVIEVK</a>   |
| 1.1   | 1387.6844 | 2.0410  | <a href="#">AGGPRTFSEVPDR</a> |

**Mascot:** <http://www.matrixscience.com/>

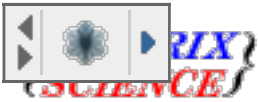

# Mascot Search Results

## Peptide View

MS/MS Fragmentation of **ALDDFVLGSAR**

Found in **gi20070422**, PRA1 family protein 2 [Mus musculus]

Match to Query 5497: 1164.525448 from(583.270000,2+) intensity(30006.5859) rtinseconds(1517.8133) index(4210)

Title: 15859\_20130128\_Glp1r\_mouse.5093.5093.

Data file 15859\_20130128\_Glp1r\_mouse.mgf

Click mouse within plot area to zoom in by factor of two about that point

Or, Plot from  to  Da

Label all possible matches  Label matches used for scoring

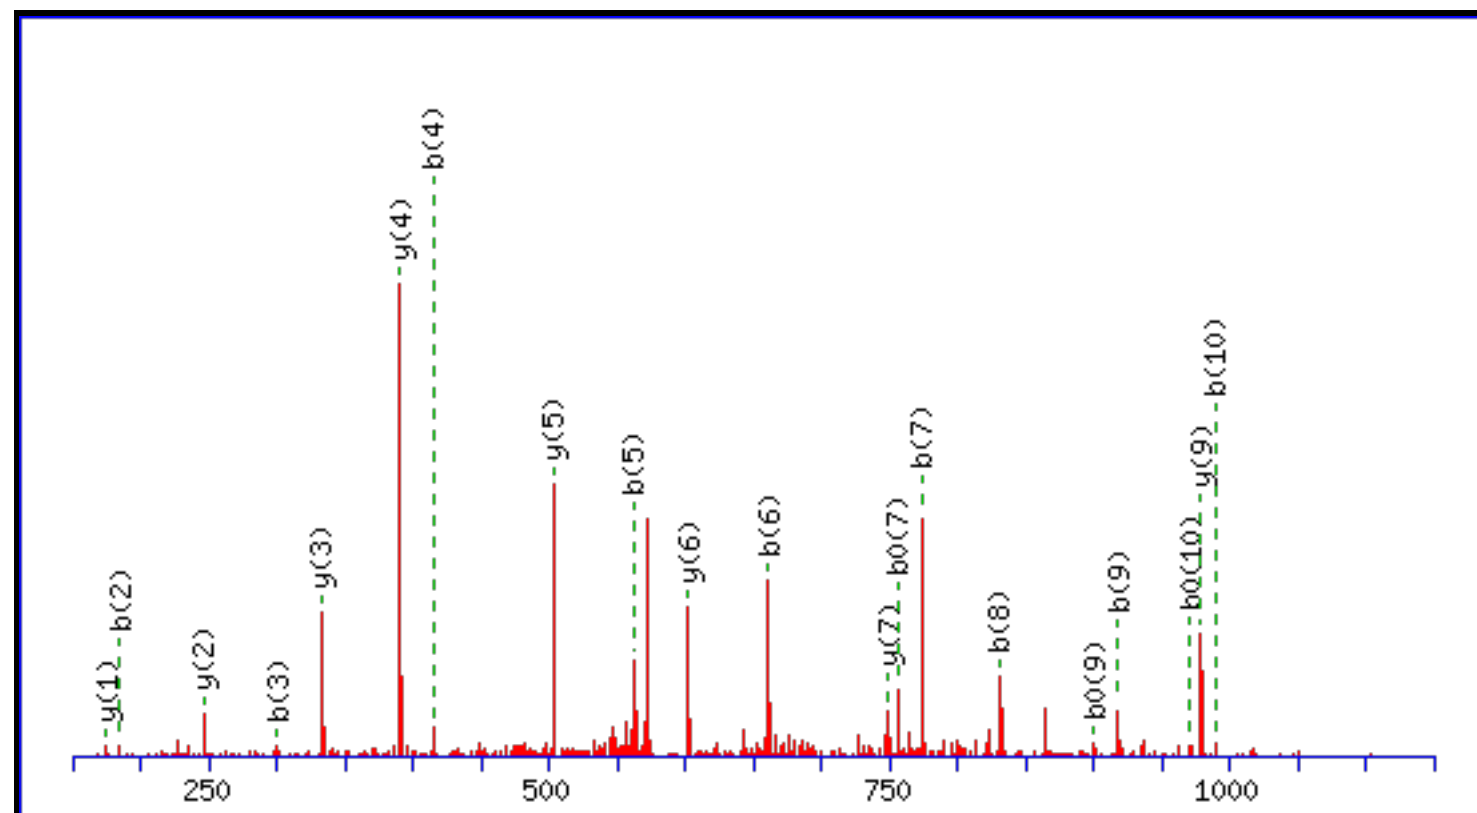

**Monoisotopic mass of neutral peptide Mr(calc):** 1162.5982

**Fixed modifications:** Carbamidomethyl (C) (apply to specified residues or termini only)

**Ions Score:** 67 **Expect:** 0.0002

**Matches :** 20/92 fragment ions using 37 most intense peaks ([help](#))

| #  | b               | b <sup>++</sup> | b <sup>0</sup>  | b <sup>0++</sup> | Seq. | y               | y <sup>++</sup> | y <sup>*</sup> | y <sup>*++</sup> | y <sup>0</sup> | y <sup>0++</sup> | #  |
|----|-----------------|-----------------|-----------------|------------------|------|-----------------|-----------------|----------------|------------------|----------------|------------------|----|
| 1  | 72.0444         | 36.5258         |                 |                  | A    |                 |                 |                |                  |                |                  | 11 |
| 2  | <b>185.1285</b> | 93.0679         |                 |                  | L    | 1092.5684       | 546.7878        | 1075.5419      | 538.2746         | 1074.5578      | 537.7826         | 10 |
| 3  | <b>300.1554</b> | 150.5813        | 282.1448        | 141.5761         | D    | <b>979.4843</b> | 490.2458        | 962.4578       | 481.7325         | 961.4738       | 481.2405         | 9  |
| 4  | <b>415.1823</b> | 208.0948        | 397.1718        | 199.0895         | D    | 864.4574        | 432.7323        | 847.4308       | 424.2191         | 846.4468       | 423.7271         | 8  |
| 5  | <b>562.2508</b> | 281.6290        | 544.2402        | 272.6237         | F    | <b>749.4305</b> | 375.2189        | 732.4039       | 366.7056         | 731.4199       | 366.2136         | 7  |
| 6  | <b>661.3192</b> | 331.1632        | 643.3086        | 322.1579         | V    | <b>602.3620</b> | 301.6847        | 585.3355       | 293.1714         | 584.3515       | 292.6794         | 6  |
| 7  | <b>774.4032</b> | 387.7053        | <b>756.3927</b> | 378.7000         | L    | <b>503.2936</b> | 252.1504        | 486.2671       | 243.6372         | 485.2831       | 243.1452         | 5  |
| 8  | <b>831.4247</b> | 416.2160        | 813.4141        | 407.2107         | G    | <b>390.2096</b> | 195.6084        | 373.1830       | 187.0951         | 372.1990       | 186.6031         | 4  |
| 9  | <b>918.4567</b> | 459.7320        | <b>900.4462</b> | 450.7267         | S    | <b>333.1881</b> | 167.0977        | 316.1615       | 158.5844         | 315.1775       | 158.0924         | 3  |
| 10 | <b>989.4938</b> | 495.2506        | <b>971.4833</b> | 486.2453         | A    | <b>246.1561</b> | 123.5817        | 229.1295       | 115.0684         |                |                  | 2  |

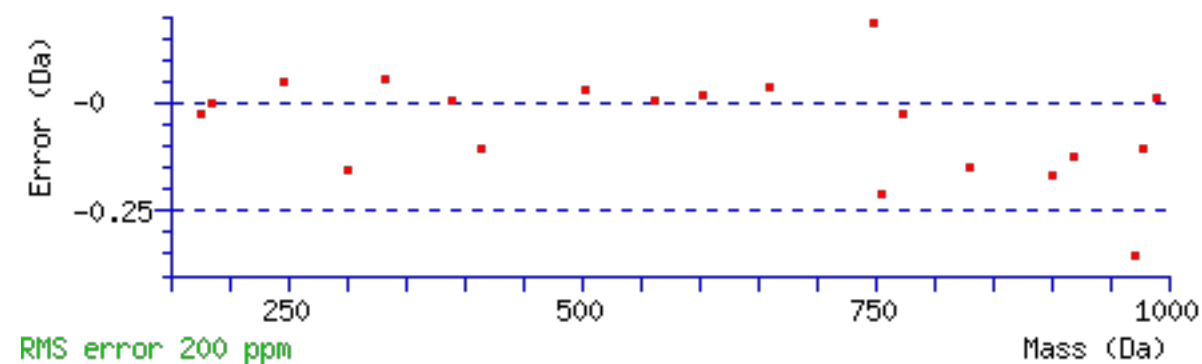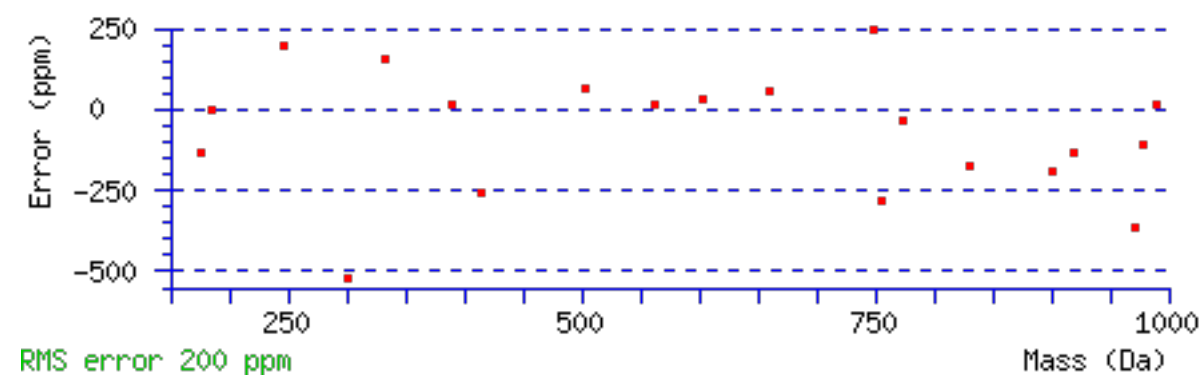

NCBI **BLAST** search of [ALDDFVLGSAR](#)

(Parameters: blastp, nr protein database, expect=20000, no filter, PAM30)

Other BLAST [web gateways](#)

#### All matches to this query

| Score | Mr(calc): | Delta   | Sequence                     |
|-------|-----------|---------|------------------------------|
| 66.9  | 1162.5982 | 1.9272  | <a href="#">ALDDFVLGSAR</a>  |
| 24.8  | 1162.5401 | 1.9854  | <a href="#">GTSCPLSASGAR</a> |
| 15.8  | 1162.4924 | 2.0330  | <a href="#">AEPSNCDGSVK</a>  |
| 15.8  | 1162.4924 | 2.0330  | <a href="#">MNSTPNENEK</a>   |
| 15.8  | 1162.6207 | 1.9048  | <a href="#">SGNVIFRGSAR</a>  |
| 13.3  | 1162.5652 | 1.9602  | <a href="#">LMESTDPSKR</a>   |
| 12.6  | 1162.6710 | 1.8545  | <a href="#">LLYGLTNTLR</a>   |
| 12.1  | 1162.5553 | 1.9701  | <a href="#">SPDFRPSMAR</a>   |
| 11.5  | 1166.5311 | -2.0057 | <a href="#">DVDSLALCMK</a>   |
| 10.0  | 1163.5796 | 0.9459  | <a href="#">QGNPQHLSQR</a>   |

Mascot: <http://www.matrixscience.com/>



# Mascot Search Results

## Peptide View

MS/MS Fragmentation of **IIASSPDMDLPTVSALR**

Found in **gil19526878**, pyrroline-5-carboxylate reductase 2 [Mus musculus]

Match to Query 11504: 1786.565448 from(894.290000,2+) intensity(16815.4043) rtinseconds(1898.64) index(5288)

Title: 16590\_20130315\_min6\_glp1R\_2hrp.06359.06359.0.dta

Data file 16590\_20130315\_min6\_glp1R\_2hrp.mgf

Click mouse within plot area to zoom in by factor of two about that point

Or, Plot from  to  Da

Label all possible matches  Label matches used for scoring

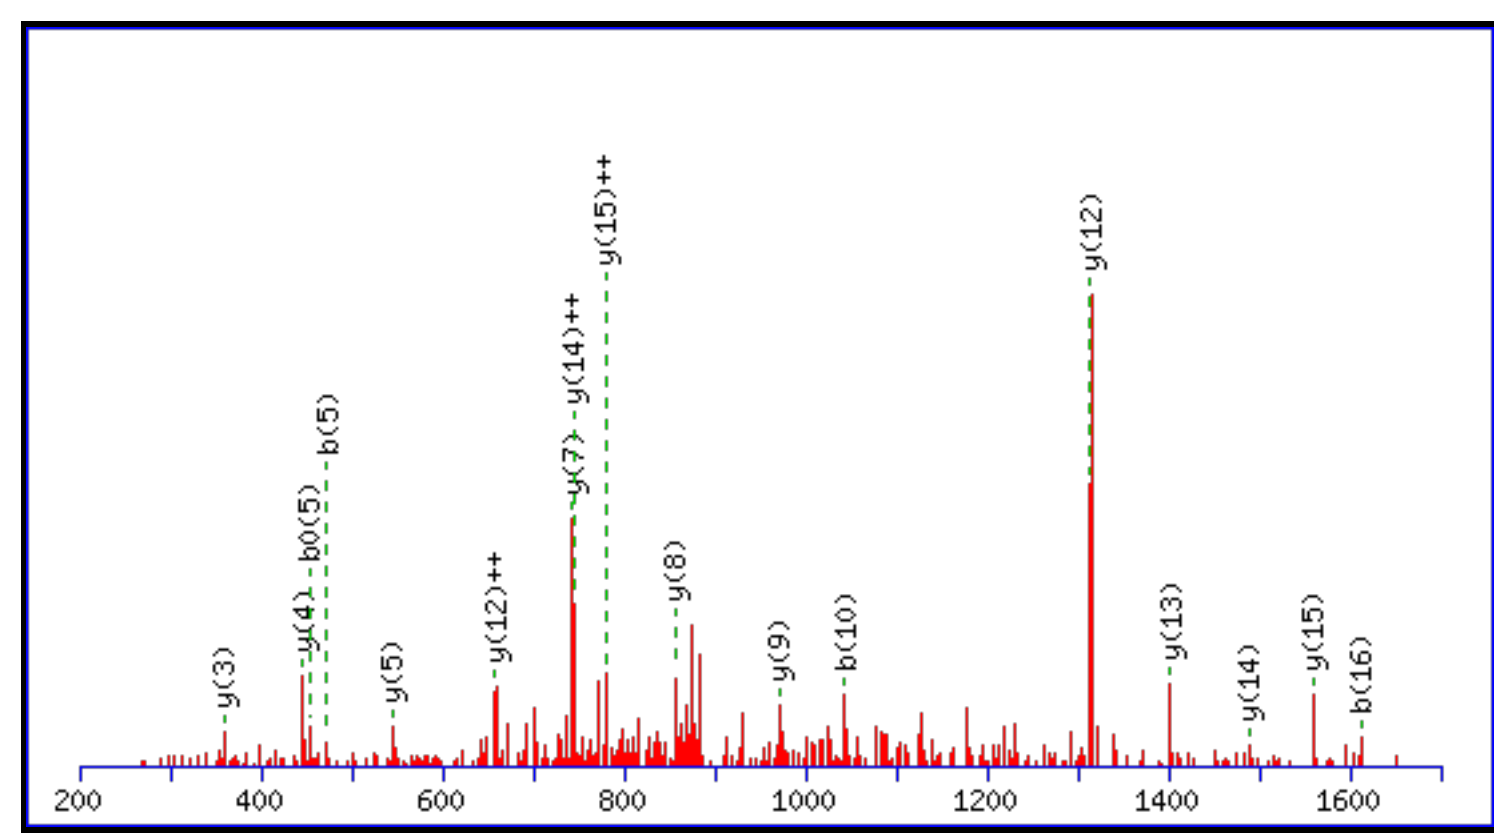

**Monoisotopic mass of neutral peptide Mr(calc):** 1784.9342

**Fixed modifications:** Carbamidomethyl (C) (apply to specified residues or termini only)

**Ions Score:** 72 **Expect:** 4e-05

**Matches :** 17/148 fragment ions using 28 most intense peaks ([help](#))

| #                  | b                | b <sup>++</sup> | b <sup>0</sup>  | b <sup>0++</sup> | Seq.     | y                | y <sup>++</sup> | y <sup>*</sup> | y <sup>*++</sup> | y <sup>0</sup> | y <sup>0++</sup> | #                  |
|--------------------|------------------|-----------------|-----------------|------------------|----------|------------------|-----------------|----------------|------------------|----------------|------------------|--------------------|
| <a href="#">1</a>  | 114.0913         | 57.5493         |                 |                  | <b>I</b> |                  |                 |                |                  |                |                  | <a href="#">17</a> |
| <a href="#">2</a>  | 227.1754         | 114.0913        |                 |                  | <b>I</b> | 1672.8574        | 836.9324        | 1655.8309      | 828.4191         | 1654.8469      | 827.9271         | <a href="#">16</a> |
| <a href="#">3</a>  | 298.2125         | 149.6099        |                 |                  | <b>A</b> | <b>1559.7734</b> | <b>780.3903</b> | 1542.7468      | 771.8771         | 1541.7628      | 771.3850         | <a href="#">15</a> |
| <a href="#">4</a>  | 385.2445         | 193.1259        | 367.2340        | 184.1206         | <b>S</b> | <b>1488.7363</b> | <b>744.8718</b> | 1471.7097      | 736.3585         | 1470.7257      | 735.8665         | <a href="#">14</a> |
| <a href="#">5</a>  | <b>472.2766</b>  | 236.6419        | <b>454.2660</b> | 227.6366         | <b>S</b> | <b>1401.7042</b> | 701.3558        | 1384.6777      | 692.8425         | 1383.6937      | 692.3505         | <a href="#">13</a> |
| <a href="#">6</a>  | 569.3293         | 285.1683        | 551.3188        | 276.1630         | <b>P</b> | <b>1314.6722</b> | <b>657.8397</b> | 1297.6457      | 649.3265         | 1296.6616      | 648.8345         | <a href="#">12</a> |
| <a href="#">7</a>  | 684.3563         | 342.6818        | 666.3457        | 333.6765         | <b>D</b> | 1217.6194        | 609.3134        | 1200.5929      | 600.8001         | 1199.6089      | 600.3081         | <a href="#">11</a> |
| <a href="#">8</a>  | 815.3968         | 408.2020        | 797.3862        | 399.1967         | <b>M</b> | 1102.5925        | 551.7999        | 1085.5660      | 543.2866         | 1084.5819      | 542.7946         | <a href="#">10</a> |
| <a href="#">9</a>  | 930.4237         | 465.7155        | 912.4131        | 456.7102         | <b>D</b> | <b>971.5520</b>  | 486.2796        | 954.5255       | 477.7664         | 953.5415       | 477.2744         | <a href="#">9</a>  |
| <a href="#">10</a> | <b>1043.5078</b> | 522.2575        | 1025.4972       | 513.2522         | <b>L</b> | <b>856.5251</b>  | 428.7662        | 839.4985       | 420.2529         | 838.5145       | 419.7609         | <a href="#">8</a>  |
| <a href="#">11</a> | 1140.5605        | 570.7839        | 1122.5500       | 561.7786         | <b>P</b> | <b>743.4410</b>  | 372.2241        | 726.4145       | 363.7109         | 725.4305       | 363.2189         | <a href="#">7</a>  |

|           |                  |          |           |          |          |                 |          |          |          |          |          |          |
|-----------|------------------|----------|-----------|----------|----------|-----------------|----------|----------|----------|----------|----------|----------|
| <b>12</b> | 1241.6082        | 621.3077 | 1223.5977 | 612.3025 | <b>T</b> | 646.3883        | 323.6978 | 629.3617 | 315.1845 | 628.3777 | 314.6925 | <b>6</b> |
| <b>13</b> | 1340.6766        | 670.8420 | 1322.6661 | 661.8367 | <b>V</b> | <b>545.3406</b> | 273.1739 | 528.3140 | 264.6606 | 527.3300 | 264.1686 | <b>5</b> |
| <b>14</b> | 1427.7087        | 714.3580 | 1409.6981 | 705.3527 | <b>S</b> | <b>446.2722</b> | 223.6397 | 429.2456 | 215.1264 | 428.2616 | 214.6344 | <b>4</b> |
| <b>15</b> | 1498.7458        | 749.8765 | 1480.7352 | 740.8712 | <b>A</b> | <b>359.2401</b> | 180.1237 | 342.2136 | 171.6104 |          |          | <b>3</b> |
| <b>16</b> | <b>1611.8298</b> | 806.4186 | 1593.8193 | 797.4133 | <b>L</b> | 288.2030        | 144.6051 | 271.1765 | 136.0919 |          |          | <b>2</b> |
| <b>17</b> |                  |          |           |          | <b>R</b> | 175.1190        | 88.0631  | 158.0924 | 79.5498  |          |          | <b>1</b> |

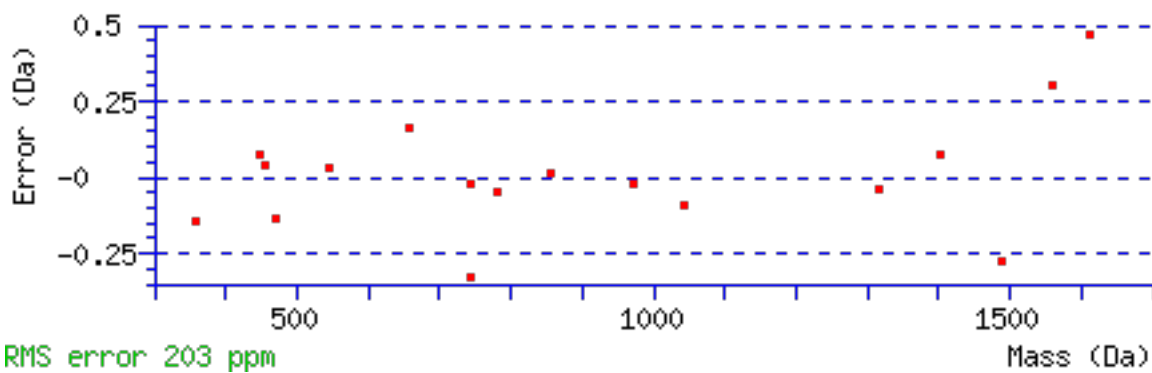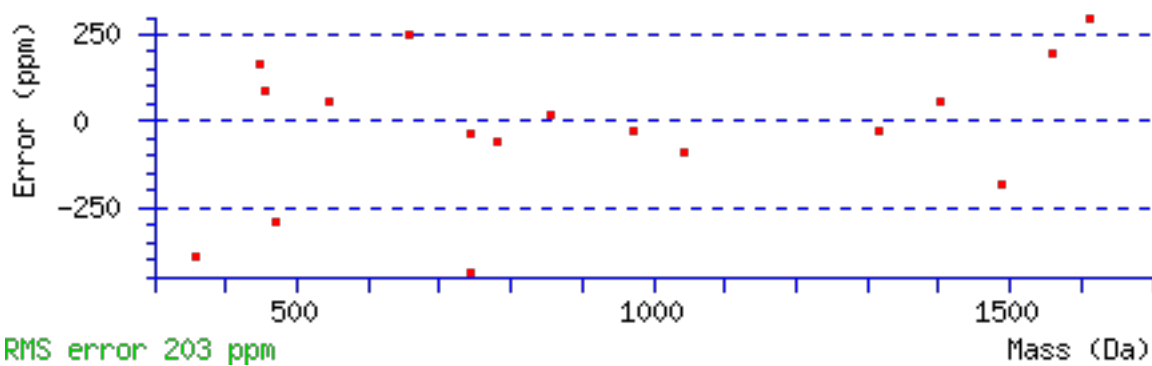

NCBI **BLAST** search of [IIASSPDMDLPTVSALR](#)

(Parameters: blastp, nr protein database, expect=20000, no filter, PAM30)

Other BLAST [web gateways](#)

**All matches to this query**

| Score | Mr(calc): | Delta   | Sequence                          |
|-------|-----------|---------|-----------------------------------|
| 71.8  | 1784.9342 | 1.6312  | <a href="#">IIASSPDMDLPTVSALR</a> |
| 10.8  | 1785.9083 | 0.6571  | <a href="#">AENMHLTELYLSLPR</a>   |
| 8.0   | 1784.9396 | 1.6258  | <a href="#">IIARGFCIDGFTFLR</a>   |
| 8.0   | 1784.9396 | 1.6258  | <a href="#">ILARGFCVGEFTFLR</a>   |
| 6.9   | 1786.8445 | -0.2791 | <a href="#">RESDGTPGGLASLENER</a> |
| 5.3   | 1784.9309 | 1.6346  | <a href="#">EQTLEAAYVPVVVDPR</a>  |
| 5.0   | 1785.9221 | 0.6434  | <a href="#">SNPSVSSLLQKVDEQR</a>  |
| 4.9   | 1786.9247 | -0.3593 | <a href="#">LDGEGITCIGNLEKLR</a>  |
| 4.0   | 1785.8720 | 0.6935  | <a href="#">ETSNFGFMLSSGKLPR</a>  |
| 3.5   | 1786.8632 | -0.2977 | <a href="#">NNRSTSPVTDPSMPIR</a>  |

Mascot: <http://www.matrixscience.com/>

## Peptide View

MS/MS Fragmentation of **GVDLTEPAQPAR**

Found in **gil13385374**, ras-related protein Rab-5A [Mus musculus]

Match to Query 6087: 1253.245448 from(627.630000,2+) intensity(39021.2031) rtinseconds(759.023) index(2151)

Title: 17006\_20130508\_glp1R\_lig\_min6cells\_num2.2586.2586.0.dta

Data file 17006\_20130508\_glp1R\_lig\_min6cells\_num2.mgf

Click mouse within plot area to zoom in by factor of two about that point

Or,   to  Da

Label all possible matches  Label matches used for scoring

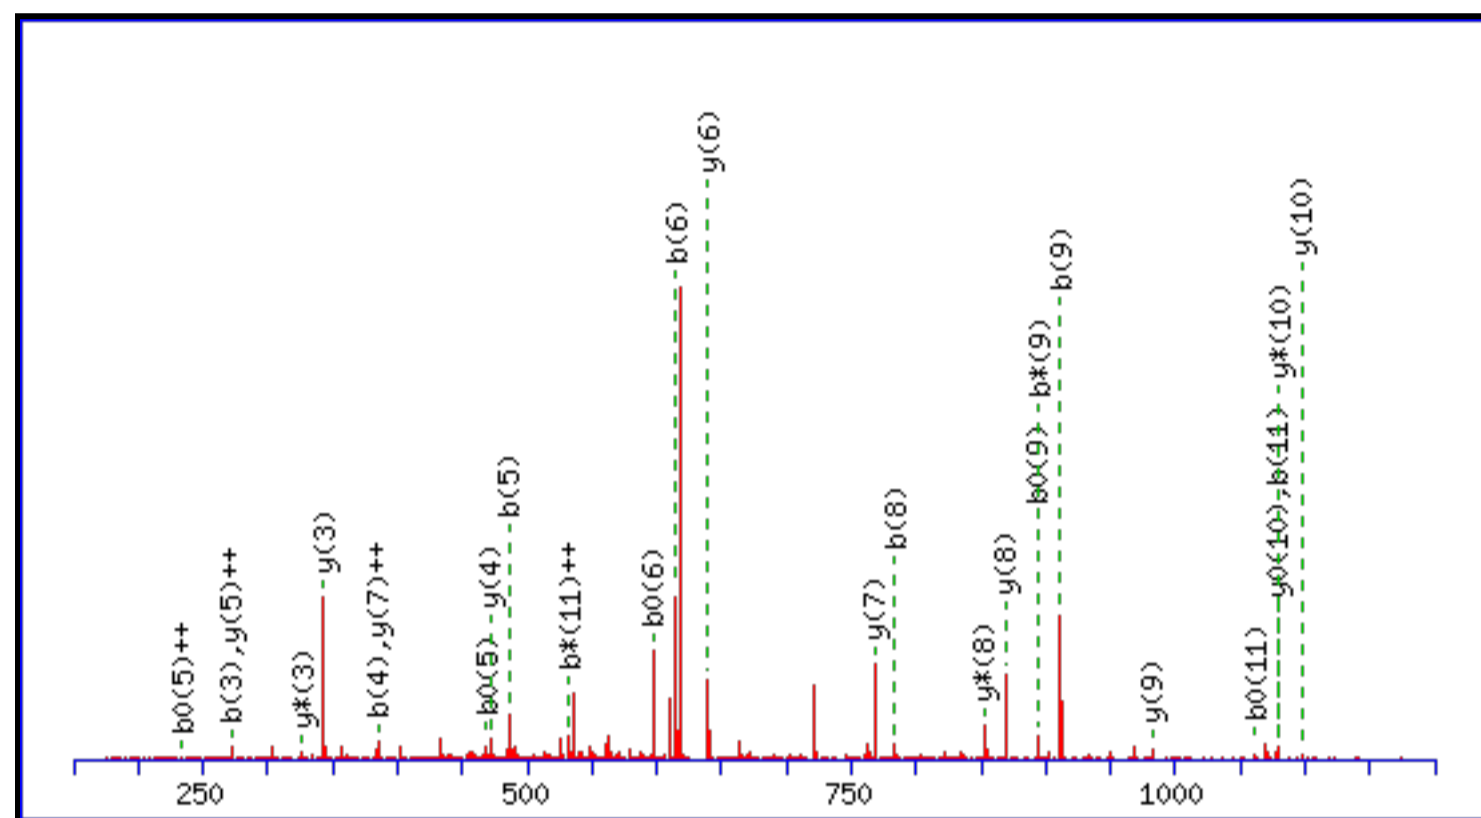

**Monoisotopic mass of neutral peptide Mr(calc):** 1252.6412

**Fixed modifications:** Carbamidomethyl (C) (apply to specified residues or termini only)

**Ions Score:** 38 **Expect:** 0.14

**Matches :** 27/100 fragment ions using 50 most intense peaks ([help](#))

| #  | b                | b <sup>++</sup> | b <sup>*</sup>  | b <sup>*++</sup> | b <sup>0</sup>   | b <sup>0++</sup> | Seq.     | y                | y <sup>++</sup> | y <sup>*</sup>   | y <sup>*++</sup> | y <sup>0</sup>   | y <sup>0++</sup> | #         |
|----|------------------|-----------------|-----------------|------------------|------------------|------------------|----------|------------------|-----------------|------------------|------------------|------------------|------------------|-----------|
| 1  | 58.0287          | 29.5180         |                 |                  |                  |                  | <b>G</b> |                  |                 |                  |                  |                  |                  | <b>12</b> |
| 2  | 157.0972         | 79.0522         |                 |                  |                  |                  | <b>V</b> | 1196.6270        | 598.8171        | 1179.6004        | 590.3039         | 1178.6164        | 589.8118         | <b>11</b> |
| 3  | <b>272.1241</b>  | 136.5657        |                 |                  | 254.1135         | 127.5604         | <b>D</b> | <b>1097.5586</b> | 549.2829        | <b>1080.5320</b> | 540.7696         | <b>1079.5480</b> | 540.2776         | <b>10</b> |
| 4  | <b>385.2082</b>  | 193.1077        |                 |                  | 367.1976         | 184.1024         | <b>L</b> | <b>982.5316</b>  | 491.7694        | 965.5051         | 483.2562         | 964.5211         | 482.7642         | <b>9</b>  |
| 5  | <b>486.2558</b>  | 243.6316        |                 |                  | 468.2453         | 234.6263         | <b>T</b> | <b>869.4476</b>  | 435.2274        | <b>852.4210</b>  | 426.7141         | 851.4370         | 426.2221         | <b>8</b>  |
| 6  | <b>615.2984</b>  | 308.1529        |                 |                  | 597.2879         | 299.1476         | <b>E</b> | <b>768.3999</b>  | <b>384.7036</b> | 751.3733         | 376.1903         | 750.3893         | 375.6983         | <b>7</b>  |
| 7  | 712.3512         | 356.6792        |                 |                  | 694.3406         | 347.6740         | <b>P</b> | <b>639.3573</b>  | 320.1823        | 622.3307         | 311.6690         |                  |                  | <b>6</b>  |
| 8  | <b>783.3883</b>  | 392.1978        |                 |                  | 765.3777         | 383.1925         | <b>A</b> | 542.3045         | <b>271.6559</b> | 525.2780         | 263.1426         |                  |                  | <b>5</b>  |
| 9  | <b>911.4469</b>  | 456.2271        | <b>894.4203</b> | 447.7138         | <b>893.4363</b>  | 447.2218         | <b>Q</b> | <b>471.2674</b>  | 236.1373        | 454.2409         | 227.6241         |                  |                  | <b>4</b>  |
| 10 | 1008.4997        | 504.7535        | 991.4731        | 496.2402         | 990.4891         | 495.7482         | <b>P</b> | <b>343.2088</b>  | 172.1081        | <b>326.1823</b>  | 163.5948         |                  |                  | <b>3</b>  |
| 11 | <b>1079.5368</b> | 540.2720        | 1062.5102       | <b>531.7587</b>  | <b>1061.5262</b> | 531.2667         | <b>A</b> | 246.1561         | 123.5817        | 229.1295         | 115.0684         |                  |                  | <b>2</b>  |
| 12 |                  |                 |                 |                  |                  |                  | <b>R</b> | 175.1190         | 88.0631         | 158.0924         | 79.5498          |                  |                  | <b>1</b>  |

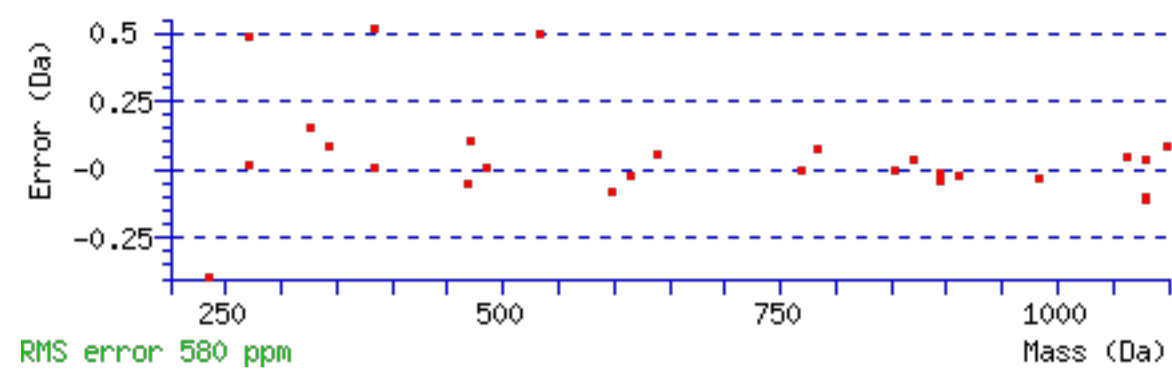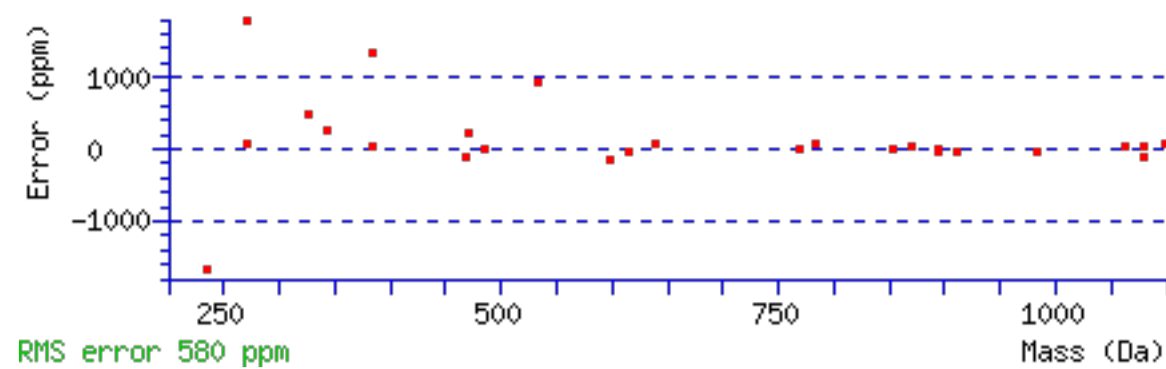

NCBI **BLAST** search of [GVDLTEPAQPAR](#)

(Parameters: blastp, nr protein database, expect=20000, no filter, PAM30)

Other BLAST [web gateways](#)

**All matches to this query**

| Score | Mr(calc): | Delta   | Sequence                     |
|-------|-----------|---------|------------------------------|
| 37.8  | 1252.6412 | 0.6043  | <a href="#">GVDLTEPAQPAR</a> |
| 25.6  | 1252.6452 | 0.6003  | <a href="#">AISESYAFLPR</a>  |
| 21.5  | 1252.6048 | 0.6407  | <a href="#">ANTPTEPAAEPR</a> |
| 17.3  | 1252.7252 | 0.5203  | <a href="#">VDGRLNITLPR</a>  |
| 16.0  | 1253.6074 | -0.3620 | <a href="#">LAASFQSMEVR</a>  |
| 14.9  | 1252.6048 | 0.6407  | <a href="#">LEEQPGEQAPR</a>  |
| 11.1  | 1252.7768 | 0.4687  | <a href="#">KPFLRNLLPR</a>   |
| 11.1  | 1253.5749 | -0.3294 | <a href="#">EGREHEDGGLR</a>  |
| 10.7  | 1252.5870 | 0.6584  | <a href="#">SLCAEGAYQVR</a>  |
| 10.6  | 1252.6598 | 0.5857  | <a href="#">GQPAVIMAVDPR</a> |

**Mascot:** <http://www.matrixscience.com/>



## Peptide View

MS/MS Fragmentation of **LVFLGEQSVGK**

Found in **gi30424655**, ras-related protein Rab-6B [Mus musculus]

Match to Query 5650: 1175.765448 from(588.890000,2+) intensity(46726.2031) rtinseconds(1162.0777) index(3229)

Title: 15859\_20130128\_Glp1r\_mouse.3916.3916.

Data file 15859\_20130128\_Glp1r\_mouse.mgf

Click mouse within plot area to zoom in by factor of two about that point

Or,   to  Da

Label all possible matches  Label matches used for scoring

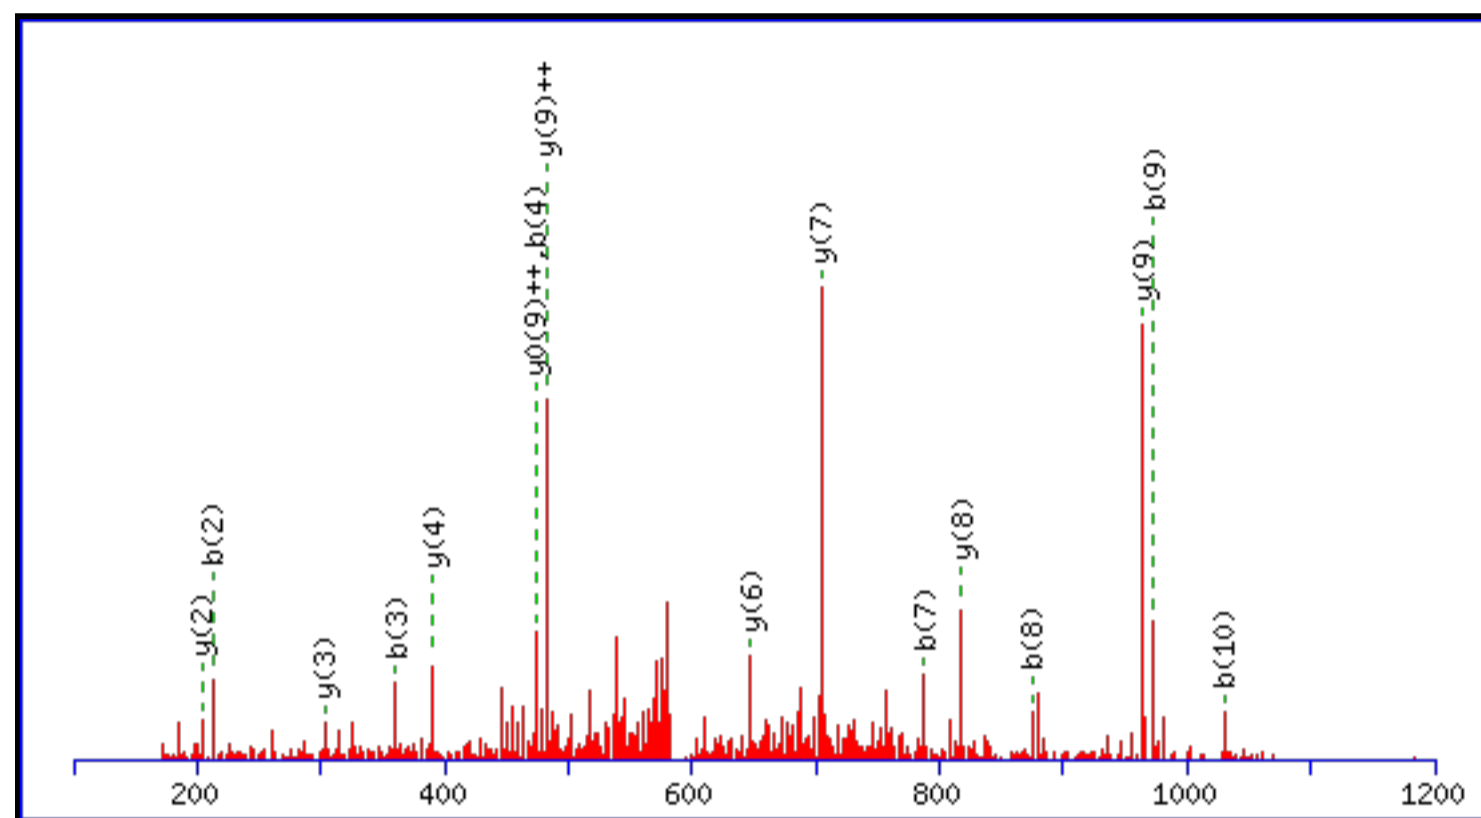

**Monoisotopic mass of neutral peptide  $M_r(\text{calc})$ :** 1175.6550

**Fixed modifications:** Carbamidomethyl (C) (apply to specified residues or termini only)

**Ions Score:** 50 **Expect:** 0.0091

**Matches :** 16/92 fragment ions using 27 most intense peaks ([help](#))

| #  | b                | b <sup>++</sup> | b*        | b <sup>+++</sup> | b <sup>0</sup> | b <sup>0++</sup> | Seq. | y               | y <sup>++</sup> | y*        | y <sup>+++</sup> | y <sup>0</sup> | y <sup>0++</sup> | #  |
|----|------------------|-----------------|-----------|------------------|----------------|------------------|------|-----------------|-----------------|-----------|------------------|----------------|------------------|----|
| 1  | 114.0913         | 57.5493         |           |                  |                |                  | L    |                 |                 |           |                  |                |                  | 11 |
| 2  | <b>213.1598</b>  | 107.0835        |           |                  |                |                  | V    | 1063.5782       | 532.2928        | 1046.5517 | 523.7795         | 1045.5677      | 523.2875         | 10 |
| 3  | <b>360.2282</b>  | 180.6177        |           |                  |                |                  | F    | <b>964.5098</b> | <b>482.7585</b> | 947.4833  | 474.2453         | 946.4993       | <b>473.7533</b>  | 9  |
| 4  | <b>473.3122</b>  | 237.1598        |           |                  |                |                  | L    | <b>817.4414</b> | 409.2243        | 800.4149  | 400.7111         | 799.4308       | 400.2191         | 8  |
| 5  | 530.3337         | 265.6705        |           |                  |                |                  | G    | <b>704.3573</b> | 352.6823        | 687.3308  | 344.1690         | 686.3468       | 343.6770         | 7  |
| 6  | 659.3763         | 330.1918        |           |                  | 641.3657       | 321.1865         | E    | <b>647.3359</b> | 324.1716        | 630.3093  | 315.6583         | 629.3253       | 315.1663         | 6  |
| 7  | <b>787.4349</b>  | 394.2211        | 770.4083  | 385.7078         | 769.4243       | 385.2158         | Q    | 518.2933        | 259.6503        | 501.2667  | 251.1370         | 500.2827       | 250.6450         | 5  |
| 8  | <b>874.4669</b>  | 437.7371        | 857.4403  | 429.2238         | 856.4563       | 428.7318         | S    | <b>390.2347</b> | 195.6210        | 373.2082  | 187.1077         | 372.2241       | 186.6157         | 4  |
| 9  | <b>973.5353</b>  | 487.2713        | 956.5088  | 478.7580         | 955.5247       | 478.2660         | V    | <b>303.2027</b> | 152.1050        | 286.1761  | 143.5917         |                |                  | 3  |
| 10 | <b>1030.5568</b> | 515.7820        | 1013.5302 | 507.2688         | 1012.5462      | 506.7767         | G    | <b>204.1343</b> | 102.5708        | 187.1077  | 94.0575          |                |                  | 2  |
| 11 |                  |                 |           |                  |                |                  | K    | 147.1128        | 74.0600         | 130.0863  | 65.5468          |                |                  | 1  |

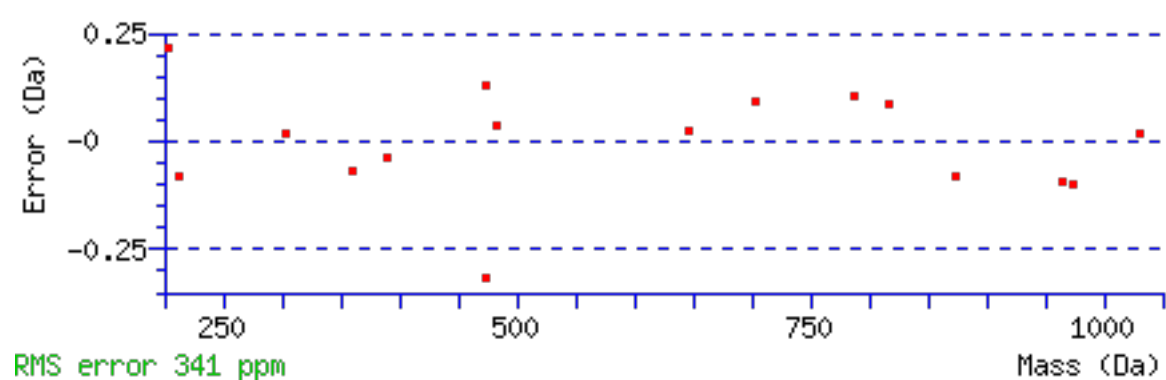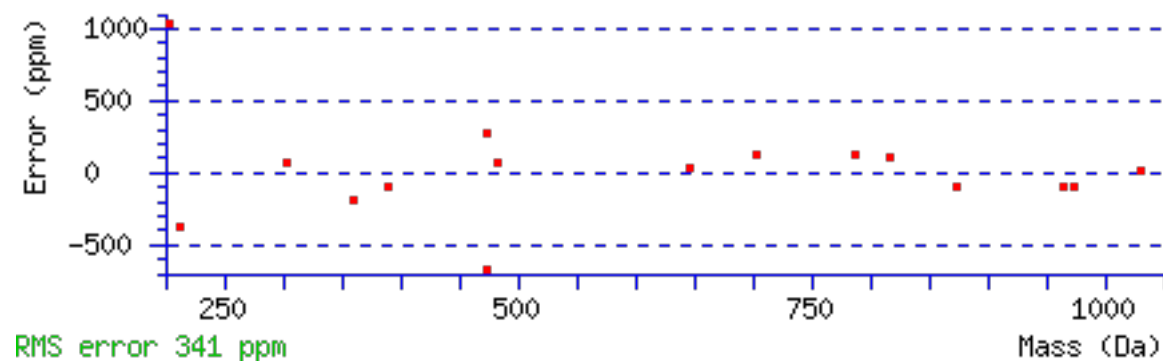

NCBI BLAST search of [LVFLGEQSVGK](#)

(Parameters: blastp, nr protein database, expect=20000, no filter, PAM30)

Other BLAST [web gateways](#)

**All matches to this query**

| Score | Mr(calc): | Delta   | Sequence                    |
|-------|-----------|---------|-----------------------------|
| 50.2  | 1175.6550 | 0.1104  | <a href="#">LVFLGEQSVGK</a> |
| 19.8  | 1175.6662 | 0.0992  | <a href="#">LVISNPYSRK</a>  |
| 14.1  | 1175.7026 | 0.0628  | <a href="#">IAILGYRSVGK</a> |
| 11.3  | 1177.6013 | -1.8358 | <a href="#">DVMKTVVQDK</a>  |
| 10.8  | 1173.6427 | 2.1227  | <a href="#">IVLLGDMNVGK</a> |
| 10.5  | 1173.6104 | 2.1551  | <a href="#">MEYKLSFIK</a>   |
| 9.9   | 1175.5968 | 0.1686  | <a href="#">DAVAMTDRLGK</a> |
| 8.7   | 1177.6707 | -1.9052 | <a href="#">TLLFISNDKK</a>  |
| 8.5   | 1172.6037 | 3.1617  | <a href="#">VOELESQVNK</a>  |
| 8.1   | 1175.6815 | 0.0839  | <a href="#">LVFRLWQSK</a>   |

**Mascot:** <http://www.matrixscience.com/>



# Mascot Search Results

## Peptide View

### MS/MS Fragmentation of **ATVNLLGDEK**

Found in **gil161016826**, receptor expression-enhancing protein 5 [Mus musculus]

Match to Query 2941: 1060.205448 from(531.110000,2+) intensity(37886.5312) rtinseconds(566.534) index(1592)

Title: 16590\_20130315\_min6\_glp1R\_2hrp.01923.01923.0.dta

Data file 16590\_20130315\_min6\_glp1R\_2hrp.mgf

Click mouse within plot area to zoom in by factor of two about that point

Or,   to  Da

Label all possible matches  Label matches used for scoring

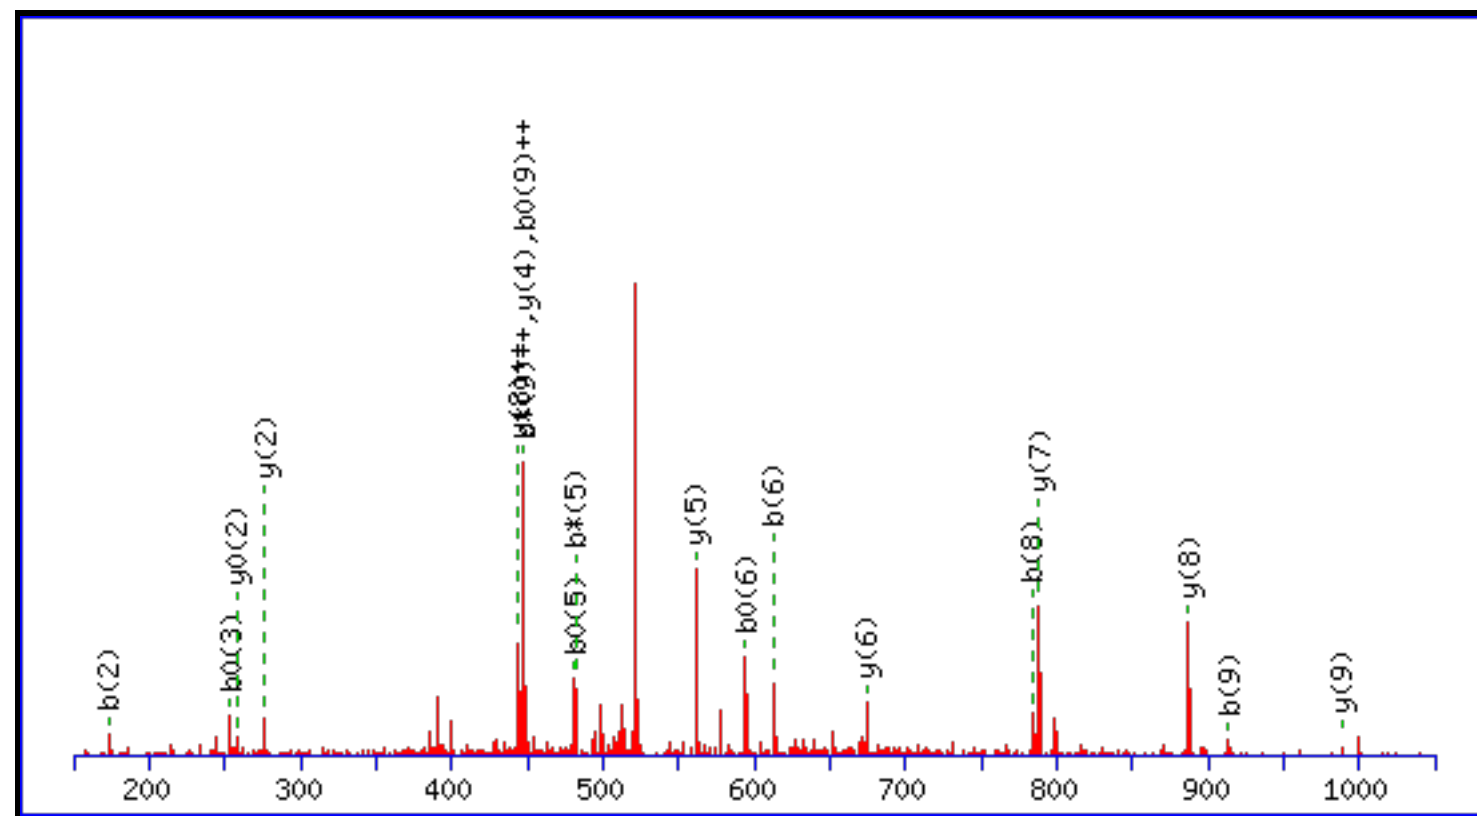

**Monoisotopic mass of neutral peptide Mr(calc):** 1058.5608

**Fixed modifications:** Carbamidomethyl (C) (apply to specified residues or termini only)

**Ions Score:** 53 **Expect:** 0.0055

**Matches :** 19/98 fragment ions using 27 most intense peaks ([help](#))

| #  | b               | b <sup>++</sup> | b*              | b <sup>*++</sup> | b <sup>0</sup>  | b <sup>0++</sup> | Seq. | y               | y <sup>++</sup> | y*       | y <sup>*++</sup> | y <sup>0</sup>  | y <sup>0++</sup> | #  |
|----|-----------------|-----------------|-----------------|------------------|-----------------|------------------|------|-----------------|-----------------|----------|------------------|-----------------|------------------|----|
| 1  | 72.0444         | 36.5258         |                 |                  |                 |                  | A    |                 |                 |          |                  |                 |                  | 10 |
| 2  | <b>173.0921</b> | 87.0497         |                 |                  | 155.0815        | 78.0444          | T    | <b>988.5310</b> | 494.7691        | 971.5044 | 486.2558         | 970.5204        | 485.7638         | 9  |
| 3  | 272.1605        | 136.5839        |                 |                  | <b>254.1499</b> | 127.5786         | V    | <b>887.4833</b> | <b>444.2453</b> | 870.4567 | 435.7320         | 869.4727        | 435.2400         | 8  |
| 4  | 386.2034        | 193.6053        | 369.1769        | 185.0921         | 368.1928        | 184.6001         | N    | <b>788.4149</b> | 394.7111        | 771.3883 | 386.1978         | 770.4043        | 385.7058         | 7  |
| 5  | 499.2875        | 250.1474        | <b>482.2609</b> | 241.6341         | <b>481.2769</b> | 241.1421         | L    | <b>674.3719</b> | 337.6896        | 657.3454 | 329.1763         | 656.3614        | 328.6843         | 6  |
| 6  | <b>612.3715</b> | 306.6894        | 595.3450        | 298.1761         | <b>594.3610</b> | 297.6841         | L    | <b>561.2879</b> | 281.1476        | 544.2613 | 272.6343         | 543.2773        | 272.1423         | 5  |
| 7  | 669.3930        | 335.2001        | 652.3665        | 326.6869         | 651.3824        | 326.1949         | G    | <b>448.2038</b> | 224.6055        | 431.1773 | 216.0923         | 430.1932        | 215.6003         | 4  |
| 8  | <b>784.4199</b> | 392.7136        | 767.3934        | 384.2003         | 766.4094        | 383.7083         | D    | 391.1823        | 196.0948        | 374.1558 | 187.5815         | 373.1718        | 187.0895         | 3  |
| 9  | <b>913.4625</b> | 457.2349        | 896.4360        | <b>448.7216</b>  | 895.4520        | <b>448.2296</b>  | E    | <b>276.1554</b> | 138.5813        | 259.1288 | 130.0681         | <b>258.1448</b> | 129.5761         | 2  |
| 10 |                 |                 |                 |                  |                 |                  | K    | 147.1128        | 74.0600         | 130.0863 | 65.5468          |                 |                  | 1  |

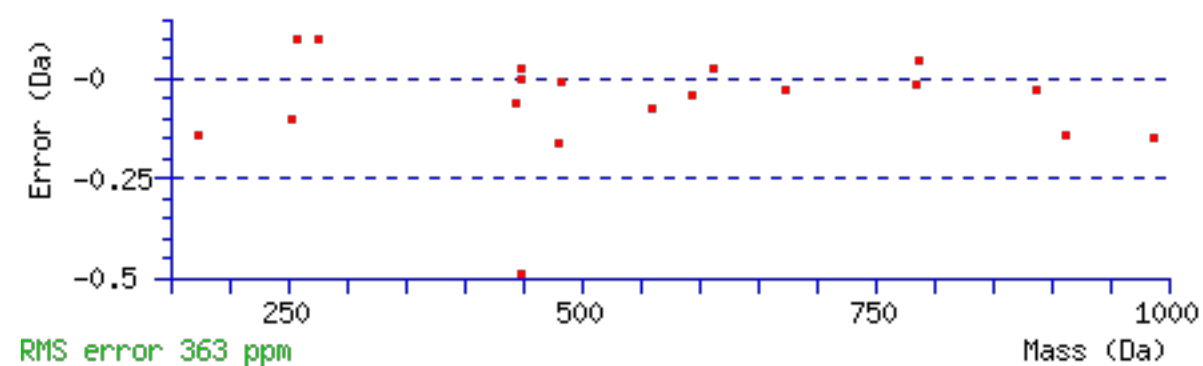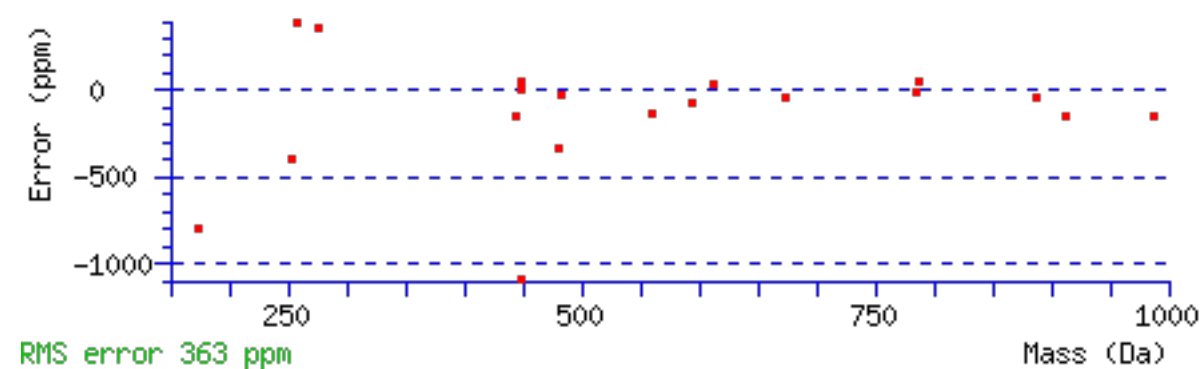

NCBI **BLAST** search of [ATVNLLGDEK](#)  
 (Parameters: blastp, nr protein database, expect=20000, no filter, PAM30)  
 Other BLAST [web gateways](#)

**All matches to this query**

| Score | Mr(calc): | Delta   | Sequence                   |
|-------|-----------|---------|----------------------------|
| 52.8  | 1058.5608 | 1.6447  | <a href="#">ATVNLLGDEK</a> |
| 20.5  | 1058.5972 | 1.6083  | <a href="#">EQQLLSTLK</a>  |
| 17.7  | 1060.5335 | -0.3281 | <a href="#">MANDILVNR</a>  |
| 15.4  | 1058.5608 | 1.6447  | <a href="#">AKEGIEVGEK</a> |
| 14.1  | 1059.5825 | 0.6229  | <a href="#">RETILWSR</a>   |
| 13.9  | 1058.5972 | 1.6083  | <a href="#">ATVLGTELOK</a> |
| 13.8  | 1058.5356 | 1.6698  | <a href="#">AASRPEATEK</a> |
| 13.6  | 1059.5600 | 0.6454  | <a href="#">ADSLLVWEK</a>  |
| 11.6  | 1057.6131 | 2.5923  | <a href="#">IRDLLDVSK</a>  |
| 11.6  | 1057.6244 | 2.5811  | <a href="#">LIRDLATTR</a>  |

**Mascot:** <http://www.matrixscience.com/>

## Peptide View

MS/MS Fragmentation of **NYDIGAALDTIQYSK**

Found in **gil6754954**, sequestosome-1 [Mus musculus]

Match to Query 11061: 1671.405448 from(836.710000,2+) intensity(24918.2344) rtinseconds(1870.3582) index(5162)

Title: 15859\_20130128\_Glp1r\_mouse.6235.6235.

Data file 15859\_20130128\_Glp1r\_mouse.mgf

Click mouse within plot area to zoom in by factor of two about that point

Or, Plot from  to  Da

Label all possible matches  Label matches used for scoring

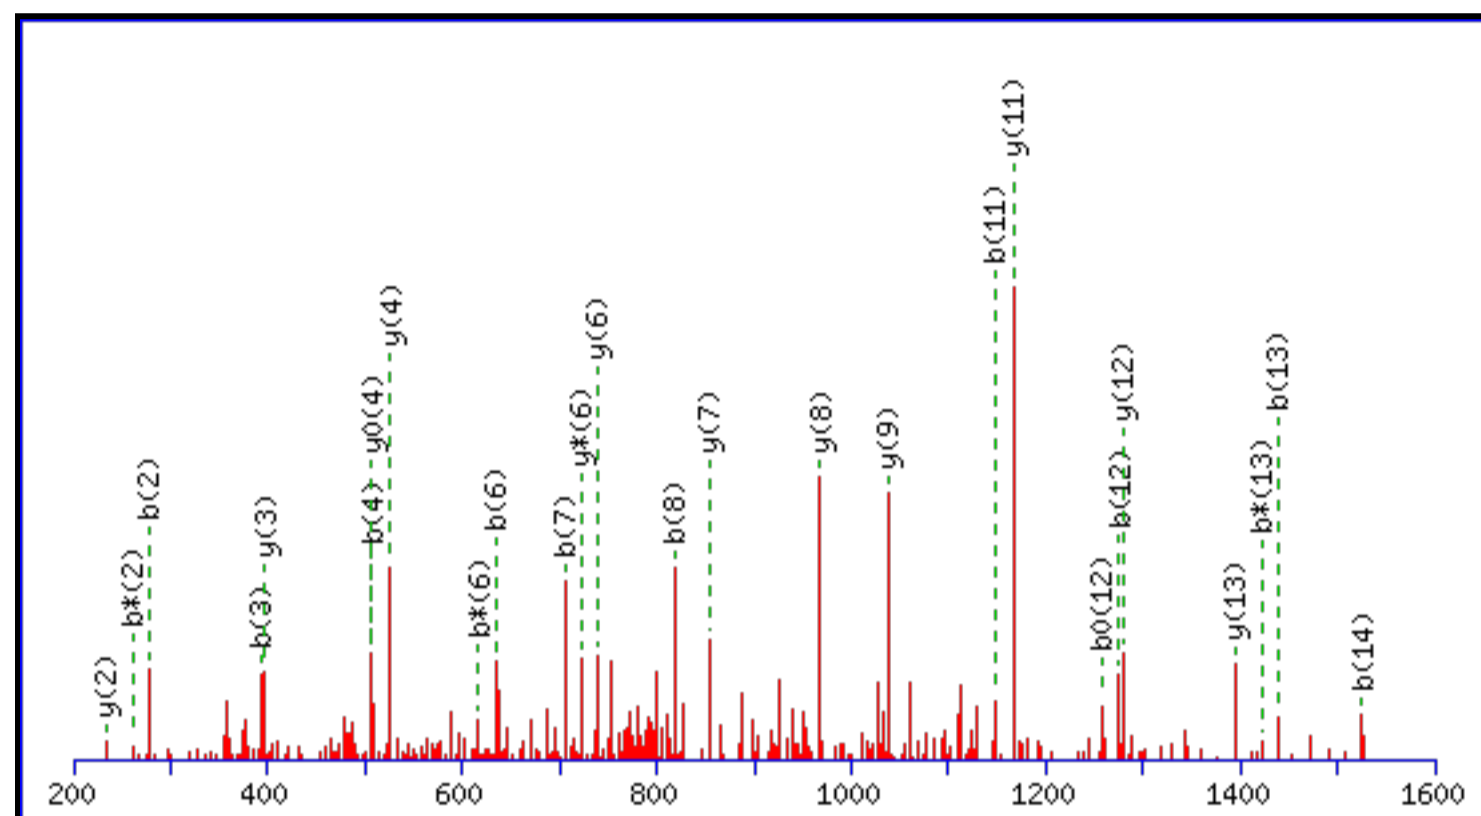

**Monoisotopic mass of neutral peptide Mr(calc):** 1670.8151

**Fixed modifications:** Carbamidomethyl (C) (apply to specified residues or termini only)

**Ions Score:** 76 **Expect:** 1.5e-05

**Matches :** 26/162 fragment ions using 39 most intense peaks ([help](#))

| #  | b                | b <sup>++</sup> | b*               | b <sup>+++</sup> | b <sup>0</sup>   | b <sup>0++</sup> | Seq. | y                | y <sup>++</sup> | y*              | y <sup>+++</sup> | y <sup>0</sup>  | y <sup>0++</sup> | #  |
|----|------------------|-----------------|------------------|------------------|------------------|------------------|------|------------------|-----------------|-----------------|------------------|-----------------|------------------|----|
| 1  | 115.0502         | 58.0287         | 98.0237          | 49.5155          |                  |                  | N    |                  |                 |                 |                  |                 |                  | 15 |
| 2  | <b>278.1135</b>  | 139.5604        | <b>261.0870</b>  | 131.0471         |                  |                  | Y    | 1557.7795        | 779.3934        | 1540.7530       | 770.8801         | 1539.7690       | 770.3881         | 14 |
| 3  | <b>393.1405</b>  | 197.0739        | 376.1139         | 188.5606         | 375.1299         | 188.0686         | D    | <b>1394.7162</b> | 697.8617        | 1377.6896       | 689.3485         | 1376.7056       | 688.8564         | 13 |
| 4  | <b>506.2245</b>  | 253.6159        | 489.1980         | 245.1026         | 488.2140         | 244.6106         | I    | <b>1279.6892</b> | 640.3483        | 1262.6627       | 631.8350         | 1261.6787       | 631.3430         | 12 |
| 5  | 563.2460         | 282.1266        | 546.2195         | 273.6134         | 545.2354         | 273.1214         | G    | <b>1166.6052</b> | 583.8062        | 1149.5786       | 575.2930         | 1148.5946       | 574.8009         | 11 |
| 6  | <b>634.2831</b>  | 317.6452        | <b>617.2566</b>  | 309.1319         | 616.2726         | 308.6399         | A    | 1109.5837        | 555.2955        | 1092.5572       | 546.7822         | 1091.5732       | 546.2902         | 10 |
| 7  | <b>705.3202</b>  | 353.1638        | 688.2937         | 344.6505         | 687.3097         | 344.1585         | A    | <b>1038.5466</b> | 519.7769        | 1021.5201       | 511.2637         | 1020.5360       | 510.7717         | 9  |
| 8  | <b>818.4043</b>  | 409.7058        | 801.3777         | 401.1925         | 800.3937         | 400.7005         | L    | <b>967.5095</b>  | 484.2584        | 950.4829        | 475.7451         | 949.4989        | 475.2531         | 8  |
| 9  | 933.4312         | 467.2193        | 916.4047         | 458.7060         | 915.4207         | 458.2140         | D    | <b>854.4254</b>  | 427.7164        | 837.3989        | 419.2031         | 836.4149        | 418.7111         | 7  |
| 10 | 1034.4789        | 517.7431        | 1017.4524        | 509.2298         | 1016.4684        | 508.7378         | T    | <b>739.3985</b>  | 370.2029        | <b>722.3719</b> | 361.6896         | 721.3879        | 361.1976         | 6  |
| 11 | <b>1147.5630</b> | 574.2851        | 1130.5364        | 565.7719         | 1129.5524        | 565.2798         | I    | 638.3508         | 319.6790        | 621.3243        | 311.1658         | 620.3402        | 310.6738         | 5  |
| 12 | <b>1275.6216</b> | 638.3144        | 1258.5950        | 629.8011         | <b>1257.6110</b> | 629.3091         | Q    | <b>525.2667</b>  | 263.1370        | 508.2402        | 254.6237         | <b>507.2562</b> | 254.1317         | 4  |
| 13 | <b>1438.6849</b> | 719.8461        | <b>1421.6583</b> | 711.3328         | 1420.6743        | 710.8408         | Y    | <b>397.2082</b>  | 199.1077        | 380.1816        | 190.5944         | 379.1976        | 190.1024         | 3  |
| 14 | <b>1525.7169</b> | 763.3621        | 1508.6904        | 754.8488         | 1507.7064        | 754.3568         | S    | <b>234.1448</b>  | 117.5761        | 217.1183        | 109.0628         | 216.1343        | 108.5708         | 2  |
| 15 |                  |                 |                  |                  |                  |                  | K    | 147.1128         | 74.0600         | 130.0863        | 65.5468          |                 |                  | 1  |

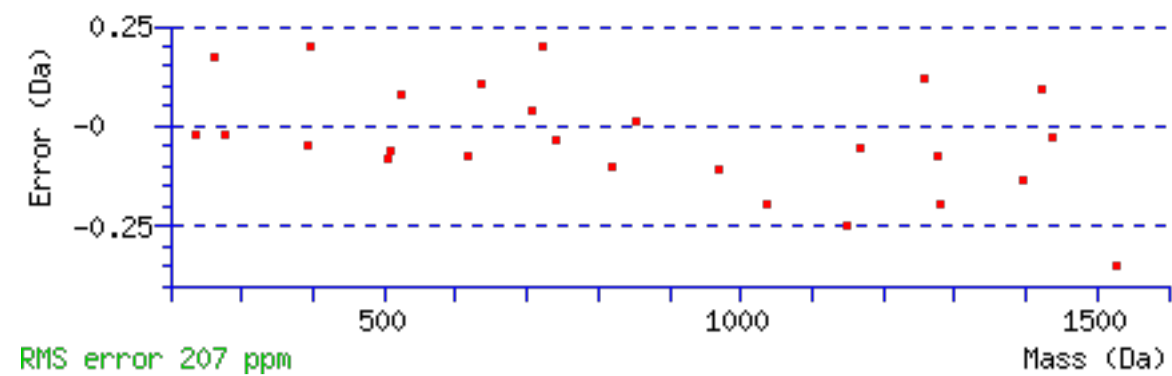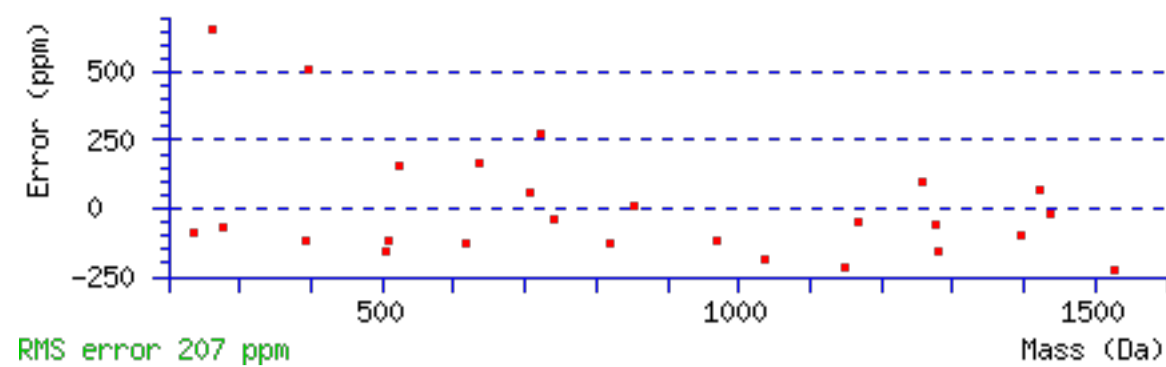

NCBI **BLAST** search of [NYDIGAALDTIQYSK](#)  
 (Parameters: blastp, nr protein database, expect=20000, no filter, PAM30)  
 Other BLAST [web gateways](#)

**All matches to this query**

| Score | Mr(calc): | Delta   | Sequence                         |
|-------|-----------|---------|----------------------------------|
| 76.1  | 1670.8151 | 0.5903  | <a href="#">NYDIGAALDTIQYSK</a>  |
| 16.3  | 1670.9719 | 0.4335  | <a href="#">DLKQQLQALKPVYK</a>   |
| 14.3  | 1670.8484 | 0.5571  | <a href="#">MGVSRSAATVLAYAMK</a> |
| 6.8   | 1671.0083 | 0.3971  | <a href="#">LVLRLQSDLQFVLK</a>   |
| 6.1   | 1670.7424 | 0.6631  | <a href="#">SADSEYQWVTSPSSK</a>  |
| 4.5   | 1670.9290 | 0.4764  | <a href="#">MVKLDIHTLAHHLK</a>   |
| 3.9   | 1670.8820 | 0.5234  | <a href="#">FIPROPFAEYIYK</a>    |
| 3.6   | 1670.8385 | 0.5670  | <a href="#">NLRPEFMQMQUIK</a>    |
| 3.1   | 1671.7893 | -0.3838 | <a href="#">FNSQSASYPQGYVPK</a>  |
| 3.0   | 1670.6617 | 0.7437  | <a href="#">SYEDDEDMDLQPSK</a>   |

**Mascot:** <http://www.matrixscience.com/>

## Peptide View

MS/MS Fragmentation of **QLVEQVEQIQK**

Found in **gi145966911**, transmembrane emp24 domain-containing protein 9 precursor [Mus musculus]

Match to Query 7849: 1341.445448 from(671.730000,2+) intensity(19227.2695) rtinseconds(662.292) index(1826)

Title: 15859\_20130128\_Glp1r\_mouse.2231.2231.

Data file 15859\_20130128\_Glp1r\_mouse.mgf

Click mouse within plot area to zoom in by factor of two about that point

Or,   to  Da

Label all possible matches  Label matches used for scoring

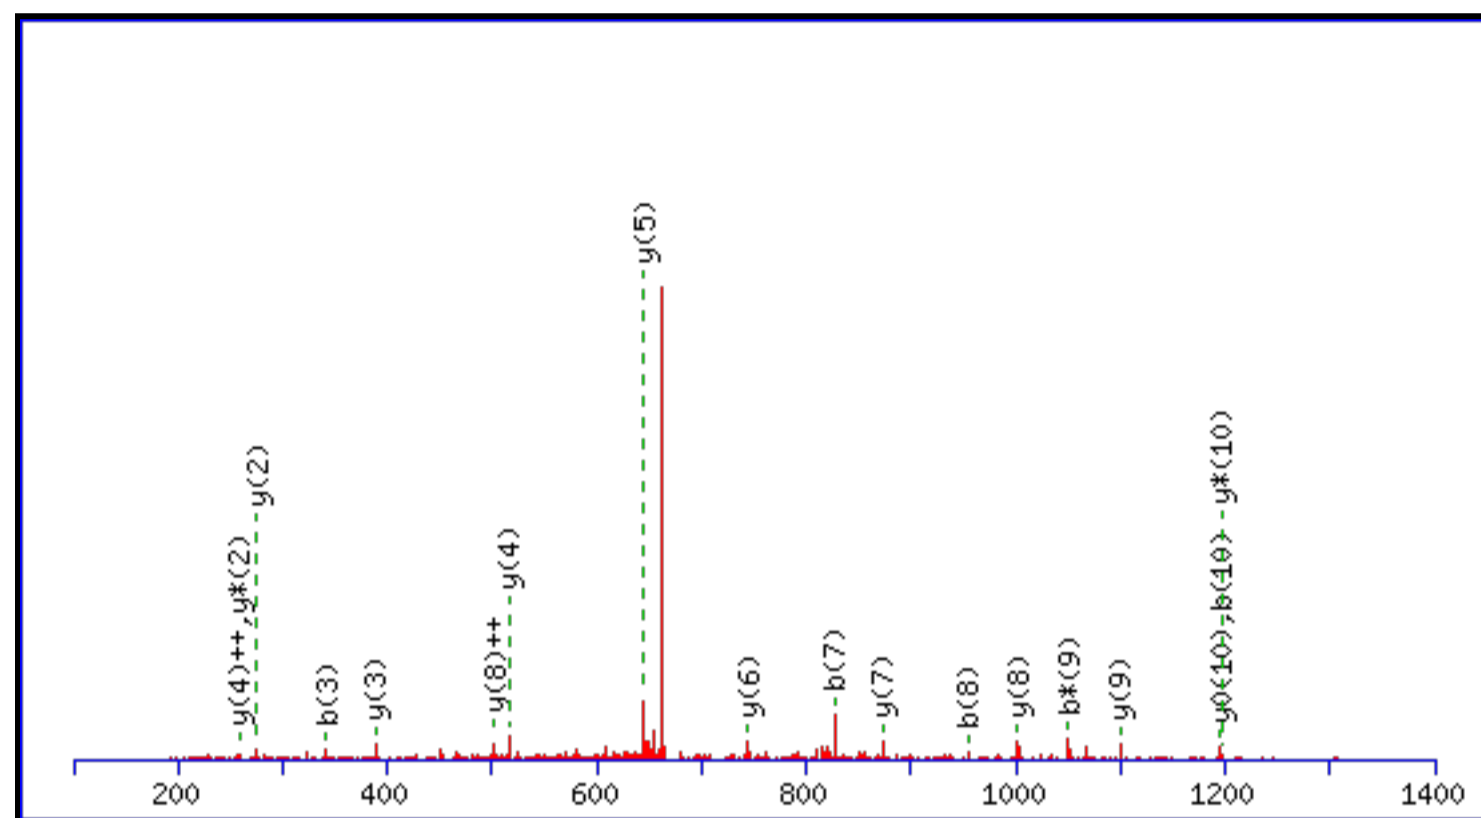

**Monoisotopic mass of neutral peptide Mr(calc):** 1340.7300

**Fixed modifications:** Carbamidomethyl (C) (apply to specified residues or termini only)

**Ions Score:** 65 **Expect:** 0.00027

**Matches :** 18/106 fragment ions using 24 most intense peaks ([help](#))

| #  | b         | b <sup>++</sup> | b <sup>*</sup> | b <sup>*++</sup> | b <sup>0</sup> | b <sup>0++</sup> | Seq. | y         | y <sup>++</sup> | y <sup>*</sup> | y <sup>*++</sup> | y <sup>0</sup> | y <sup>0++</sup> | #  |
|----|-----------|-----------------|----------------|------------------|----------------|------------------|------|-----------|-----------------|----------------|------------------|----------------|------------------|----|
| 1  | 129.0659  | 65.0366         | 112.0393       | 56.5233          |                |                  | Q    |           |                 |                |                  |                |                  | 11 |
| 2  | 242.1499  | 121.5786        | 225.1234       | 113.0653         |                |                  | L    | 1213.6787 | 607.3430        | 1196.6521      | 598.8297         | 1195.6681      | 598.3377         | 10 |
| 3  | 341.2183  | 171.1128        | 324.1918       | 162.5995         |                |                  | V    | 1100.5946 | 550.8009        | 1083.5681      | 542.2877         | 1082.5841      | 541.7957         | 9  |
| 4  | 470.2609  | 235.6341        | 453.2344       | 227.1208         | 452.2504       | 226.6288         | E    | 1001.5262 | 501.2667        | 984.4997       | 492.7535         | 983.5156       | 492.2615         | 8  |
| 5  | 598.3195  | 299.6634        | 581.2930       | 291.1501         | 580.3089       | 290.6581         | Q    | 872.4836  | 436.7454        | 855.4571       | 428.2322         | 854.4730       | 427.7402         | 7  |
| 6  | 697.3879  | 349.1976        | 680.3614       | 340.6843         | 679.3774       | 340.1923         | V    | 744.4250  | 372.7162        | 727.3985       | 364.2029         | 726.4145       | 363.7109         | 6  |
| 7  | 826.4305  | 413.7189        | 809.4040       | 405.2056         | 808.4199       | 404.7136         | E    | 645.3566  | 323.1819        | 628.3301       | 314.6687         | 627.3461       | 314.1767         | 5  |
| 8  | 954.4891  | 477.7482        | 937.4625       | 469.2349         | 936.4785       | 468.7429         | Q    | 516.3140  | 258.6607        | 499.2875       | 250.1474         |                |                  | 4  |
| 9  | 1067.5732 | 534.2902        | 1050.5466      | 525.7769         | 1049.5626      | 525.2849         | I    | 388.2554  | 194.6314        | 371.2289       | 186.1181         |                |                  | 3  |
| 10 | 1195.6317 | 598.3195        | 1178.6052      | 589.8062         | 1177.6212      | 589.3142         | Q    | 275.1714  | 138.0893        | 258.1448       | 129.5761         |                |                  | 2  |
| 11 |           |                 |                |                  |                |                  | K    | 147.1128  | 74.0600         | 130.0863       | 65.5468          |                |                  | 1  |

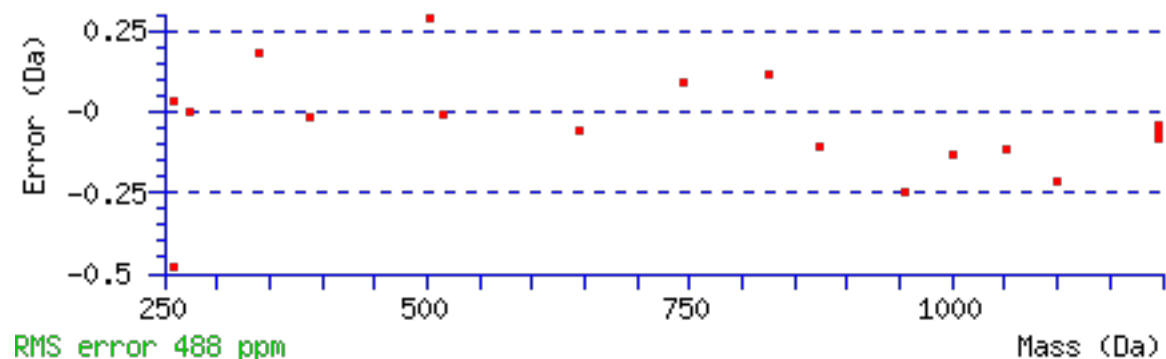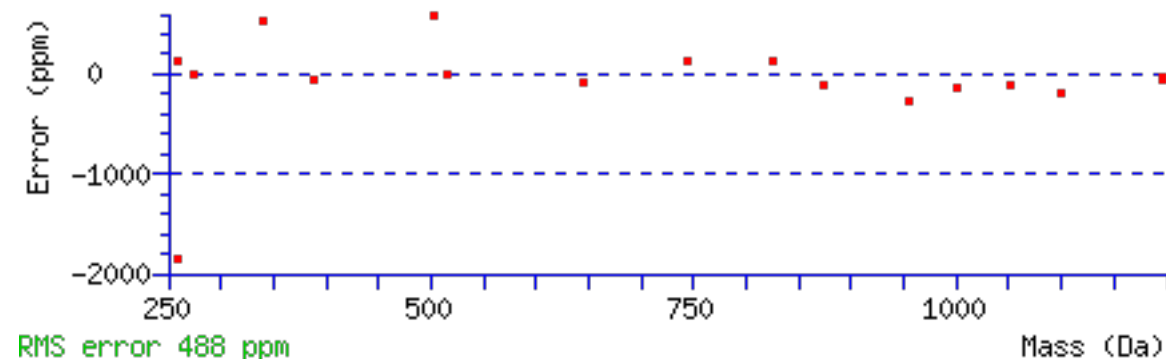

NCBI BLAST search of [QLVEQVEQIQK](#)

(Parameters: blastp, nr protein database, expect=20000, no filter, PAM30)

Other BLAST [web gateways](#)

**All matches to this query**

| Score | Mr(calc): | Delta   | Sequence                      |
|-------|-----------|---------|-------------------------------|
| 64.7  | 1340.7300 | 0.7155  | <a href="#">QLVEQVEQIQK</a>   |
| 46.5  | 1340.7300 | 0.7155  | <a href="#">QLLDQVEQIQK</a>   |
| 19.4  | 1340.7300 | 0.7155  | <a href="#">VQVEAIEGGALQK</a> |
| 14.2  | 1341.7292 | -0.2838 | <a href="#">EAHFLVEELKK</a>   |
| 13.9  | 1340.8101 | 0.6353  | <a href="#">MEASVILPILKK</a>  |
| 12.7  | 1341.6888 | -0.2434 | <a href="#">NVVADQEAQIQK</a>  |
| 11.0  | 1340.7776 | 0.6679  | <a href="#">GLSELRQGLLQK</a>  |
| 10.4  | 1340.6936 | 0.7519  | <a href="#">DIAKNEGPELQK</a>  |
| 10.3  | 1340.6659 | 0.7795  | <a href="#">QIVSAVHYCHK</a>   |
| 10.2  | 1340.7663 | 0.6791  | <a href="#">QEVLQNLKKEK</a>   |

**Mascot:** <http://www.matrixscience.com/>
