# Supplementary material
Source: PubMed Central journal article supplement (PMC4223491)
Supplement: supp_M114.040196_Supplemental_table_legends_and_supplemental_tables.pdf [file supp_M114.040196_Supplemental_table_legends_and_supplemental_tables.pdf]

## **Supplemental table legends**

**Supplemental Table S1.** GLP-1R interactors revealed by AP-MS in CHO cells.

**Supplemental Table S2.** GLP-1R interactors revealed by AP-MS in MIN6 cells.

**Supplemental Table S3.** Primer sequences for qPCR.

**Supplemental Table S4.** Protein abundance estimation of 4 potential GLP-1R interactors in CHO and MIN6 cells in liganded and unliganded states by using emPAI score normalized to bait protein (GLP-1R). All values represent the emPAI score of interactors normalized to GLP-1R identified in the same run.

**Supplemental Table S5.** Proteins and peptides identification by mass spectrometry (Separate EXCEL file).

**Supplemental Table S6.** emPAI score of all potential GLP-1R interactors identified by AP-MS in CHO and MIN6 cells (Separate EXCEL file).

Supplemental Table S1.

| NCBI accession number | Protein name                                                                                            | Gene Name     | Unliganded GLP-1R interactors | Liganded GLP-1R interactors | Subcellular location                  | Functions                               |
|-----------------------|---------------------------------------------------------------------------------------------------------|---------------|-------------------------------|-----------------------------|---------------------------------------|-----------------------------------------|
| 354503280             | PREDICTED: annexin A2-like, partial [Cricetulus griseus]                                                | <b>ANXA2</b>  |                               | ✓                           | Secreted, extracellular               | Calcium binding.                        |
| 354498588             | PREDICTED: dnaJ homolog subfamily A member 2-like [Cricetulus griseus]                                  | <b>DNAJA2</b> | ✓                             | ✓                           | Membrane                              | Cell proliferation and protein folding. |
| 354497358             | PREDICTED: peptidyl-prolyl cis-trans isomerase FKBP11-like [Cricetulus griseus]                         | <b>FKBP11</b> | ✓                             |                             | Membrane                              | Protein folding.                        |
| 354488169             | PREDICTED: ras-related protein Rab-5B-like [Cricetulus griseus]                                         | <b>RAB5B</b>  | ✓                             | ✓                           | Cell membrane, endosome               | Protein transport.                      |
| 354471953             | PREDICTED: vesicular integral-membrane protein VIP36-like [Cricetulus griseus]                          | <b>LMAN2</b>  | ✓                             |                             | Golgi apparatus membrane, ER membrane | Protein transport.                      |
| 354477232             | PREDICTED: caveolin-1-like [Cricetulus griseus]                                                         | <b>CAV1</b>   | ✓                             | ✓                           | Golgi membrane, cell membrane         | Endocytosis and protein localization.   |
| 354485034             | PREDICTED: ras-related protein Rab-5C-like [Cricetulus griseus]                                         | <b>RAB5C</b>  | ✓                             | ✓                           | Cell membrane                         | Protein transport.                      |
| 354467387             | PREDICTED: ADP-ribosylation factor 4-like [Cricetulus griseus]                                          | <b>ARF4</b>   | ✓                             | ✓                           | Golgi apparatus                       | GTP-binding protein.                    |
| 354494420             | PREDICTED: protein RER1-like [Cricetulus griseus]                                                       | <b>RER1</b>   |                               | ✓                           | Golgi apparatus                       | Retrograde vesicle-mediated transport.  |
| 354502651             | PREDICTED: 14-3-3 protein theta-like [Cricetulus griseus]                                               | <b>YWHAQ</b>  | ✓                             | ✓                           | Cytoplasm                             | Adapter protein.                        |
| 354478978             | PREDICTED: protein S100-A6-like [Cricetulus griseus]                                                    | <b>S100A6</b> | ✓                             | ✓                           | Cytoplasm, nucleus, Plasma membrane   | Calcium signaling.                      |
| 354503516             | PREDICTED: transmembrane protein 33-like [Cricetulus griseus]                                           | <b>TMEM33</b> | ✓                             | ✓                           | Plasma membrane                       | Transport.                              |
| 354498400             | PREDICTED: ephrin type-A receptor 2-like [Cricetulus griseus]                                           | <b>EPHA2</b>  | ✓                             | ✓                           | Plasma membrane                       | Receptor tyrosine kinase.               |
| 346227187             | guanine nucleotide-binding protein G(i) subunit alpha-2 [Cricetulus griseus]                            | <b>GNAI2</b>  | ✓                             | ✓                           | Plasma membrane, Cytoplasm            | Guanine nucleotide-binding protein.     |
| 354498129             | PREDICTED: guanine nucleotide-binding protein G(l)/G(S)/G(O) subunit gamma-12-like [Cricetulus griseus] | <b>GNG12</b>  | ✓                             | ✓                           | Plasma membrane, Cytoplasm            | Guanine nucleotide-binding protein.     |
| 350539723             | guanine nucleotide-binding protein G(l)/G(S)/G(T) subunit beta-1 [Cricetulus griseus]                   | <b>GNB1</b>   | ✓                             | ✓                           | Plasma membrane, Cytoplasm            | Guanine nucleotide-binding protein.     |
| 346227195             | guanine nucleotide-binding protein G(k) subunit alpha [Cricetulus griseus]                              | <b>GNAI3</b>  | ✓                             | ✓                           | Plasma membrane, Cytoplasm            | Guanine nucleotide-binding protein.     |
| 350538021             | matrix metalloproteinase-14 [Cricetulus griseus]                                                        | <b>MMP14</b>  | ✓                             | ✓                           | Plasma membrane                       | Activate progelatinase A.               |
| 354475732             | PREDICTED: membrane-associated                                                                          | <b>PGRMC1</b> |                               | ✓                           | Plasma membrane                       | Receptor for                            |

|           |                                                                                                   |               |   |   |                                         |                                |
|-----------|---------------------------------------------------------------------------------------------------|---------------|---|---|-----------------------------------------|--------------------------------|
|           | progesterone receptor component 1-like<br>[Cricetulus griseus]                                    |               |   |   |                                         | progesterone.                  |
| 354507141 | PREDICTED: protein NDRG1<br>[Cricetulus griseus]                                                  | <b>NDRG1</b>  | ✓ | ✓ | Plasma membrane, Cytoplasm              | Stress-responsive protein.     |
| 354473456 | PREDICTED: ras-related protein Rab-18-like [Cricetulus griseus]                                   | <b>RAB18</b>  | ✓ | ✓ | Plasma membrane                         | Protein transport.             |
| 354503613 | PREDICTED: ras-related protein Rab-34-like isoform 1 [Cricetulus griseus]                         | <b>RAB34</b>  | ✓ | ✓ | Cytoplasm                               | GTP binding protein.           |
| 354476904 | PREDICTED: sodium/potassium-transporting ATPase subunit alpha-1 [Cricetulus griseus]              | <b>ATP1A1</b> | ✓ | ✓ | Plasma membrane                         | ATP biosynthetic process.      |
| 354481282 | PREDICTED: transmembrane protein Tmp21-like [Cricetulus griseus]                                  | <b>TMED10</b> | ✓ | ✓ | Plasma membrane, Cytoplasmic vesicle    | Vesicular protein trafficking. |
| 354472663 | PREDICTED: voltage-dependent anion-selective channel protein 1-like, partial [Cricetulus griseus] | <b>VDAC1</b>  | ✓ | ✓ | Plasma membrane, mitochondrial membrane | Cell apoptosis.                |
| 350537945 | peroxiredoxin-1 [Cricetulus griseus]                                                              | <b>PRDX1</b>  | ✓ | ✓ | Cytoplasm                               | Redox regulation.              |
| 354469527 | PREDICTED: cullin-associated NEDD8-dissociated protein 1-like [Cricetulus griseus]                | <b>CAND1</b>  | ✓ | ✓ | Cytoplasm. Nucleus.                     | Cell differentiation.          |
| 354476229 | PREDICTED: coatamer subunit alpha isoform 1 [Cricetulus griseus]                                  | <b>COPA</b>   | ✓ | ✓ | Cytoplasm, vesicle                      | Vesicle-mediated transport.    |
| 354466134 | PREDICTED: coatamer subunit beta~ [Cricetulus griseus]                                            | <b>COPB2</b>  | ✓ | ✓ | Cytoplasm, vesicle                      | Vesicle-mediated transport.    |
| 354488599 | PREDICTED: coatamer subunit beta [Cricetulus griseus]                                             | <b>COPB1</b>  | ✓ | ✓ | Cytoplasm, vesicle                      | Vesicle-mediated transport.    |

Supplemental Table S2.

| NCBI accession number | Protein name                                                             | Gene Name     | Unliganded GLP-1R interactors | Liganded GLP-1R interactors | Subcellular location                            | Functions                                 |
|-----------------------|--------------------------------------------------------------------------|---------------|-------------------------------|-----------------------------|-------------------------------------------------|-------------------------------------------|
| 33468885              | calcyclin binding protein                                                | <b>Cacybp</b> | ✓                             | ✓                           | Cytoplasm                                       | Cellular response to calcium ion.         |
| 6755963               | voltage-dependent anion channel 1                                        | <b>Vdac1</b>  | ✓                             | ✓                           | Mitochondrion membrane. Cell membrane           | Ion transport                             |
| 226823359             | coatamer protein complex subunit alpha                                   | <b>Copa</b>   | ✓                             | ✓                           | Cytoplasma, Golgi membrane, cytoplasmic vesicle | ER-Golgi transport, protein transport     |
| 6754012               | guanine nucleotide binding protein, alpha O                              | <b>Gnao1</b>  | ✓                             | ✓                           | Cytosol, cell membrane                          | Guanine nucleotide-binding protein.       |
| 28916687              | Rab5b protein                                                            | <b>Rab5b</b>  | ✓                             | ✓                           | Cell membrane, Endosome                         | Protein transport.                        |
| 62241017              | ATP-binding cassette, sub-family C (CFTR/MRP), member 8                  | <b>Abcc8</b>  | ✓                             | ✓                           | Cell membrane                                   | Regulation of insulin secretion.          |
| 29789080              | coatamer protein complex, subunit beta 2 (beta prime)                    | <b>Copb2</b>  | ✓                             | ✓                           | Cytoplasma, Golgi membrane, cytoplasmic vesicle | ER-Golgi transport                        |
| 113866024             | Rab5c protein                                                            | <b>Rab5c</b>  | ✓                             | ✓                           | Membrane                                        | Protein transport                         |
| 33563256              | guanine nucleotide binding protein (G protein), alpha inhibiting 3       | <b>Gnai3</b>  | ✓                             | ✓                           | Cytosol, cell membrane                          | Guanine nucleotide-binding protein.       |
| 41054806              | guanine nucleotide binding protein (G protein), alpha inhibiting 2       | <b>Gnai2</b>  | ✓                             | ✓                           | Cytosol, cell membrane                          | Guanine nucleotide-binding protein.       |
| 117959930             | Guanine nucleotide-binding protein G(s) subunit alpha isoforms XLas      | <b>Gnas</b>   | ✓                             | ✓                           | Cytosol, cell membrane                          | Guanine nucleotide-binding protein.       |
| 153792526             | ADP-ribosylation factor 1                                                | <b>Arl1</b>   | ✓                             | ✓                           | Golgi apparatus membrane                        | GTP-binding protein.                      |
| 18390323              | Ras-related protein Rab-14                                               | <b>Rab14</b>  | ✓                             | ✓                           | Endosome                                        | Protein transport.                        |
| 21312062              | transmembrane emp24-like trafficking protein 10                          | <b>Tmed10</b> | ✓                             | ✓                           | Membrane                                        | Vesicular protein trafficking.            |
| 21703854              | dehydrogenase/reductase (SDR family) member 7B                           | <b>Dhrs7b</b> | ✓                             | ✓                           | Peroxisome membrane                             | Putative oxidoreductase                   |
| 22267448              | transmembrane protein 33                                                 | <b>Tmem33</b> | ✓                             | ✓                           | Membrane                                        | Unknown.                                  |
| 21704066              | RAS-related protein-1a                                                   | <b>Rap1a</b>  | ✓                             | ✓                           | Cell membrane                                   | Rap protein signal transduction.          |
| 30841008              | Ras-related protein Rab-18                                               | <b>Rab18</b>  | ✓                             | ✓                           | Cell membrane                                   | Protein transport.                        |
| 224994186             | gamma-glutamyltransferase 7                                              | <b>Ggt7</b>   | ✓                             | ✓                           | Membrane                                        | Cleaves glutathione conjugates.           |
| 226442772             | progesterone receptor membrane component 2                               | <b>Pgrmc2</b> | ✓                             | ✓                           | Membrane                                        | Receptor for steroids                     |
| 6753138               | ATPase, Na <sup>+</sup> /K <sup>+</sup> transporting, beta 1 polypeptide | <b>Atp1b1</b> | ✓                             | ✓                           | Cell membrane                                   | Cell adhesion.                            |
| 31560774              | Ras-related protein Rab-34                                               | <b>Rab34</b>  | ✓                             | ✓                           | Cytoplasm, Golgi                                | Cell adhesion.                            |
| 226693367             | glucosidase, alpha, acid                                                 | <b>Gaa</b>    | ✓                             | ✓                           | Lysosome                                        | Glucose metabolic process.                |
| 13385434              | Multifunctional protein ADE2                                             | <b>Paics</b>  | ✓                             | ✓                           | Cytoplasm                                       | Purine biosynthesis.                      |
| 20070422              | PRA1 family protein 2                                                    | <b>Praf2</b>  | ✓                             | ✓                           | Endosome                                        | ER/Golgi transport and vesicular traffic. |

|           |                                                                                  |                |   |   |                                              |                                     |
|-----------|----------------------------------------------------------------------------------|----------------|---|---|----------------------------------------------|-------------------------------------|
| 13384618  | guanine nucleotide binding protein (G protein), gamma 12                         | <b>Gng12</b>   | ✓ | ✓ | Cytosol, cell membrane                       | Guanine nucleotide-binding protein. |
| 23956096  | USO1 homolog, vesicle docking protein                                            | <b>Uso1</b>    | ✓ | ✓ | Cytoplasm, Golgi                             | ER-Golgi transport.                 |
| 15277331  | FK506 binding protein 11                                                         | <b>Fkbp11</b>  | ✓ | ✓ | Membrane                                     | Protein synthesis.                  |
| 112817607 | thioredoxin-related transmembrane protein 4                                      | <b>Tmx4</b>    | ✓ | ✓ | Membrane                                     | Redox-active center                 |
| 13384696  | keratinocyte associated protein 2                                                | <b>Krtcap2</b> | ✓ | ✓ | membrane                                     | Protein N-linked glycosylation.     |
| 145966911 | transmembrane emp24 protein transport domain containing 9                        | <b>Tmed9</b>   | ✓ | ✓ | Membrane                                     | Vesicular protein trafficking.      |
| 15426055  | coatomer protein complex, subunit beta 1                                         | <b>Copb1</b>   | ✓ | ✓ | Cytoplasm, Golgi membrane, cytoplasm vesicle | ER-Golgi transport                  |
| 148747410 | Coatomer subunit delta                                                           | <b>Arcn1</b>   | ✓ | ✓ | Cytoplasm                                    | ER-Golgi transport                  |
| 115511018 | ubiquitin specific peptidase 9, X chromosome                                     | <b>Usp9x</b>   | ✓ | ✓ | Cytoplasm                                    | Protein deubiquitination.           |
| 13385392  | N-ethylmaleimide sensitive fusion protein attachment protein alpha               | <b>Napa</b>    | ✓ | ✓ | Membrane                                     | Vesicular transport.                |
| 6680045   | guanine nucleotide binding protein (G protein), beta 1                           | <b>Gnb1</b>    | ✓ | ✓ | Cytosol, cell membrane                       | Guanine nucleotide-binding protein. |
| 6755588   | synaptosomal-associated protein 25                                               | <b>Snap25</b>  | ✓ | ✓ | Cytoplasm, cell membrane                     | Neurotransmitter secretion          |
| 127139140 | tripartite motif-containing 21; similar to Tripartite motif protein 21           | <b>Trim21</b>  | ✓ | ✓ | Cytoplasm. Nucleus.                          | Protein ubiquitination.             |
| 226958349 | triosephosphate isomerase 1                                                      | <b>Tpi1</b>    | ✓ | ✓ | Cytoplasm                                    | Gluconeogenesis and glycolysis.     |
| 62234487  | ATPase, Ca <sup>++</sup> transporting, plasma membrane 1                         | <b>Atp2b1</b>  | ✓ | ✓ | Cell membrane                                | Calcium transport.                  |
| 11596855  | transferrin receptor                                                             | <b>Tfrc</b>    | ✓ | ✓ | Cell membrane                                | Cellular uptake of iron.            |
| 189409138 | cullin associated and neddylation disassociated 1                                | <b>Cand1</b>   | ✓ | ✓ | Cytoplasm. Nucleus.                          | Cell differentiation.               |
| 8567338   | coatomer protein complex, subunit gamma                                          | <b>Copg</b>    | ✓ | ✓ | Cytoplasm, Golgi membrane, cytoplasm vesicle | ER-Golgi transport.                 |
| 6680716   | ADP-ribosylation factor 1                                                        | <b>Arf1</b>    | ✓ | ✓ | Cytoplasm, Golgi                             | GTP-binding protein.                |
| 30794386  | translocating chain-associating membrane protein 1                               | <b>Tram1</b>   | ✓ | ✓ | Cytoplasm, Nucleus                           | Transcription regulation.           |
| 6756039   | 14-3-3 protein theta                                                             | <b>YWHAQ</b>   | ✓ | ✓ | Cytoplasm                                    | Adapter protein.                    |
| 19526878  | pyrroline-5-carboxylate reductase family, member 2                               | <b>Pycr2</b>   | ✓ | ✓ | Membrane                                     | Proline biosynthesis.               |
| 21617845  | adipocyte-related X-chromosome expressed sequence 1                              | <b>Arxes1</b>  | ✓ | ✓ | ER membrane                                  | Unknown.                            |
| 31543940  | vesicle-associated membrane protein, associated protein B and C                  | <b>Vapb</b>    | ✓ | ✓ | Cytoplasm                                    | ER unfolded protein response.       |
| 51093867  | carbamoyl-phosphate synthetase 2, aspartate transcarbamylase, and dihydroorotase | <b>Cad</b>     | ✓ | ✓ | Cytoplasm                                    | Pyrimidine biosynthesis.            |
| 34538601  | Cytochrome c oxidase subunit 2                                                   | <b>COX2</b>    | ✓ |   | Cytoplasm, Golgi                             | Fatty acid biosynthesis.            |

|           |                                                                                  |                      |   |   |                                        |                                    |
|-----------|----------------------------------------------------------------------------------|----------------------|---|---|----------------------------------------|------------------------------------|
| 224809376 | nicastrin                                                                        | <b>Ncstn</b>         | ✓ |   | Membrane                               | Membrane protein proteolysis.      |
| 103472025 | cleft lip and palate associated transmembrane protein 1                          | <b>Clptm1</b>        | ✓ |   | Cytoplasm, membrane                    | T-cell development.                |
| 23956140  | glycerophosphodiester phosphodiesterase domain containing 1                      | <b>Gdpd1</b>         | ✓ |   | Golgi membrane, cytoplasmic vesicle    | Glycerol metabolic process.        |
| 30424655  | Ras-related protein Rab-6B                                                       | <b>Rab6b</b>         | ✓ |   | Cytoplasmic vesicle                    | Protein transport.                 |
| 6679229   | proprotein convertase subtilisin/kexin type 2                                    | <b>Pcsk2</b>         | ✓ |   | Cell membrane                          | Protein autoprocessing.            |
| 9506541   | diacylglycerol kinase, epsilon                                                   | <b>Dgke</b>          | ✓ |   | Secreted                               | Intracellular signal transduction. |
| 51317387  | cyclin G associated kinase                                                       | <b>Gak</b>           | ✓ |   | Cytoplasm                              | Cell cycle.                        |
| 8394027   | protein phosphatase 2 (formerly 2A), regulatory subunit A (PR 65), alpha isoform | <b>Ppp2r1a</b>       | ✓ |   | Membrane                               | Chromosome segregation.            |
| 21361250  | ATPase, H <sup>+</sup> transporting, lysosomal accessory protein 2               | <b>Atp6ap2</b>       | ✓ |   | Peroxisome membrane;Cytosol            | Renin receptor.                    |
| 60218877  | ATP-binding cassette, sub-family D (ALD), member 3                               | <b>Abcd3</b>         | ✓ |   | Membrane                               | Transport.                         |
| 70778812  | transmembrane protein 65                                                         | <b>Tmem65</b>        | ✓ |   | Apical cell membrane;                  | Unknown.                           |
| 238637277 | solute carrier family 3 member 2                                                 | <b>Slc3a2</b>        | ✓ |   | Membrane                               | Carbohydrate metabolic process     |
| 45597453  | solute carrier family 27, member 4                                               | <b>Slc27a4</b>       | ✓ |   | Cytoplasm                              | Transmembrane transport.           |
| 85701756  | DNA segment, Chr 10, Brigham & Women's Genetics 1379 expressed                   | <b>D10Bwg1379e</b>   | ✓ |   | Membrane                               | Vesicle mediate transport          |
| 6754954   | sequestosome 1                                                                   | <b>Sqstm1</b>        |   | ✓ | Cytoplasm, endosome                    | Apoptosis                          |
| 29825825  | hypothetical protein LOC100043986                                                | <b>C630004H02Rik</b> |   | ✓ | Predicted                              | Protein transport                  |
| 30520239  | arylacetamide deacetylase-like 1                                                 | <b>Nceh1</b>         |   | ✓ | Membrane                               | Lipid metabolism                   |
| 161016826 | receptor accessory protein 5                                                     | <b>Reep5</b>         |   | ✓ | Membrane                               | Surface expression of receptors    |
| 94721328  | vesicle-associated membrane protein, associated protein A                        | <b>Vapa</b>          |   | ✓ | ER membrane                            | Vesicle trafficking.               |
| 10946644  | glucose-6-phosphatase, catalytic, 2                                              | <b>G6pc2</b>         |   | ✓ | ER membrane                            | Glucose production.                |
| 70794816  | enolase 1, alpha non-neuron                                                      | <b>Eno1</b>          |   | ✓ | unknown                                | Unknown.                           |
| 13128964  | Ras-related protein Rab-27A                                                      | <b>Rab27a</b>        |   | ✓ | Membrane, lysosome                     | Exocytosis.                        |
| 27229185  | transmembrane 9 superfamily member 1                                             | <b>Tm9sf1</b>        |   | ✓ | Lysosome membrane; cytoplasmic vesicle | Autophagy.                         |
| 13385374  | Ras-related protein Rab-5A                                                       | <b>Rab5a</b>         |   | ✓ | Cell membrane, Early endosome membrane | Endocytosis.                       |
| 31980806  | progesterone receptor membrane component 1                                       | <b>PGRMC1</b>        |   | ✓ | Membrane                               | Receptor for progesterone.         |
| 162138894 | phenylalanyl-tRNA synthetase, alpha subunit                                      | <b>Farsa</b>         |   | ✓ | Cytoplasm                              | Protein biosynthesis.              |
| 7305085   | glutamine fructose-6-phosphate transaminase 1                                    | <b>Gfpt1</b>         |   | ✓ | Cytoplasm                              | Carbohydrate biosynthetic process. |
| 34610207  | alanyl-tRNA synthetase                                                           | <b>Aars</b>          |   | ✓ | Cytoplasm                              | Protein biosynthesis.              |

|           |                                                             |                |   |                    |                             |
|-----------|-------------------------------------------------------------|----------------|---|--------------------|-----------------------------|
| 158937258 | Yip1 interacting factor homolog B                           | <b>Yif1b</b>   | ✓ | Membrane           | Vesicular trafficking.      |
| 149248877 | Predicted gene 2890                                         | <b>Gm2890</b>  | ✓ | Unknown            | Unknown.                    |
| 31324569  | Neurocalcin delta                                           | <b>Ncald</b>   | ✓ | Cytoplasm          | Calcium-mediated signaling. |
| 21312406  | ADP-dependent glucokinase                                   | <b>Adpgk</b>   | ✓ | Secreted           | Glycolysis.                 |
| 33859498  | Uridine monophosphate synthetase                            | <b>Umps</b>    | ✓ | Cytoplasm, nucleus | Pyrimidine biosynthesis.    |
| 6753320   | chaperonin containing Tcp1, subunit 3 (gamma)               | <b>Cct3</b>    | ✓ | Cytoplasm          | Molecular chaperone.        |
| 31981588  | ATPase, H <sup>+</sup> transporting, lysosomal V1 subunit H | <b>Atp6v1h</b> | ✓ | Cytosol, membrane  | Transport.                  |

Supplemental Table S3.

| <b>Gene name</b> | <b>Sequence</b>                                                           |
|------------------|---------------------------------------------------------------------------|
| PGRMC1           | Forward 5'- TTGGCCTCTGCATCTTCCTG-3'<br>Reverse 5'-TCGTATCGCCTTAGTTCGGC-3' |
| Beta-Actin       | Forward 5'-CACCCGCGAGTACAACCTTC-3'<br>Reverse 5'-CCCATACCCACCATCACACC-3'  |
| KCNJ11           | Forward 5'- AGTGTGGCTGTGGCAAAGG-3'<br>Reverse 5'-GGACCGCAACTCAGGACAA-3'   |

Supplemental Table S4.

| Interactors               | Min6          |               |               | CHO           |               |               | Min6        |             |             | CHO         |             |             |
|---------------------------|---------------|---------------|---------------|---------------|---------------|---------------|-------------|-------------|-------------|-------------|-------------|-------------|
|                           | Unligand-run1 | Unligand-run2 | Unligand-run3 | Unligand-run1 | Unligand-run2 | Unligand-run3 | Ligand-run1 | Ligand-run2 | Ligand-run3 | Ligand-run1 | Ligand-run2 | Ligand-run3 |
| <b>PGRMC1<sup>A</sup></b> | 0             | 0             | 0             | 0.952380952   |               |               | 2.571428571 | 2.714285714 |             |             | 3.333333333 | 3.333333333 |
| <b>Rab5b</b>              | 2.545454545   | 4             |               | 0.380952381   | 2.833333333   | 1             |             | 4           | 4           | 9.333333333 |             | 4.666666667 |
| <b>Rab5c</b>              | 2.590909091   | 4.071428571   |               | 0.833333333   | 1.333333333   | 1.029411765   | 8.142857143 | 5.857142857 | 5.857142857 | 5.833333333 | 2.916666667 | 2.916666667 |
| <b>Tmed10</b>             | 1.5           | 3.785714286   | 7.571428571   | 0.357         |               | 0.441176471   | 4.714285714 | 2.357142857 | 2.357142857 | 2           |             | 1.25        |

A. Because no PGRMC1 protein was identified in Min6 unliganded runs, the missing values are set as 0.
